# Supplementary material
Source: PubMed Central journal article supplement (PMC3401362)
Supplement: NIHMS376111-supplement-2.pdf [file NIHMS376111-supplement-2.pdf]

## Supplementary Information

### Proto-genes and *de novo* gene birth

Anne-Ruxandra Carvunis<sup>1,2</sup>, Thomas Rolland<sup>1</sup>, Ilan Wapinski<sup>3</sup>, Michael A. Calderwood<sup>1</sup>, Muhammed A. Yildirim<sup>4</sup>, Nicolas Simonis<sup>1†</sup>, Benoit Charlotiaux<sup>1,5</sup>, César A. Hidalgo<sup>6</sup>, Justin Barbette<sup>1</sup>, Balaji Santhanam<sup>1</sup>, Gloria A. Brar<sup>7</sup>, Jonathan S. Weissman<sup>7</sup>, Aviv Regev<sup>8,9</sup>, Nicolas Thierry-Mieg<sup>2</sup>, Michael E. Cusick<sup>1</sup> & Marc Vidal<sup>1¶</sup>

<sup>1</sup>Center for Cancer Systems Biology (CCSB) and Department of Cancer Biology, Dana-Farber Cancer Institute, and Department of Genetics, Harvard Medical School, Boston, MA 02215, USA. <sup>2</sup>UJF-Grenoble 1 / CNRS / TIMC-IMAG UMR 5525, Computational and Mathematical Biology Group, Grenoble, F-38041, France. <sup>3</sup>Department of Systems Biology, Harvard Medical School, Boston, MA 02115, USA. <sup>4</sup>Center for International Development and Harvard University, Cambridge, MA 02138, USA. <sup>5</sup>Unit of Animal Genomics, GIGA-R and Faculty of Veterinary Medicine, University of Liege, 4000 Liege, Wallonia-Brussels Federation, Belgium. <sup>6</sup>The MIT Media Lab, Massachusetts Institute of Technology, Cambridge, MA 02142, USA. <sup>7</sup>Howard Hughes Medical Institute, Department of Cellular and Molecular Pharmacology, University of California, San Francisco, and California Institute for Quantitative Biosciences, San Francisco, CA 94158, USA. <sup>8</sup>Broad Institute of MIT and Harvard, Cambridge, MA 02142, USA. <sup>9</sup>Howard Hughes Medical Institute, Department of Biology, Massachusetts Institute of Technology, Cambridge, MA 02139, USA.

<sup>†</sup>Present address: Laboratoire de Bioinformatique des Génomes et des Réseaux (BiGRé), Campus Plaine, Free University of Brussels, 1050 Brussels, Wallonia-Brussels Federation, Belgium.

<sup>¶</sup>To whom correspondence should be addressed: marc\_vidal@dfci.harvard.edu.

## Contents

Supplementary Figures and Legends

Supplementary Methods

Supplementary Tables

Supplementary References

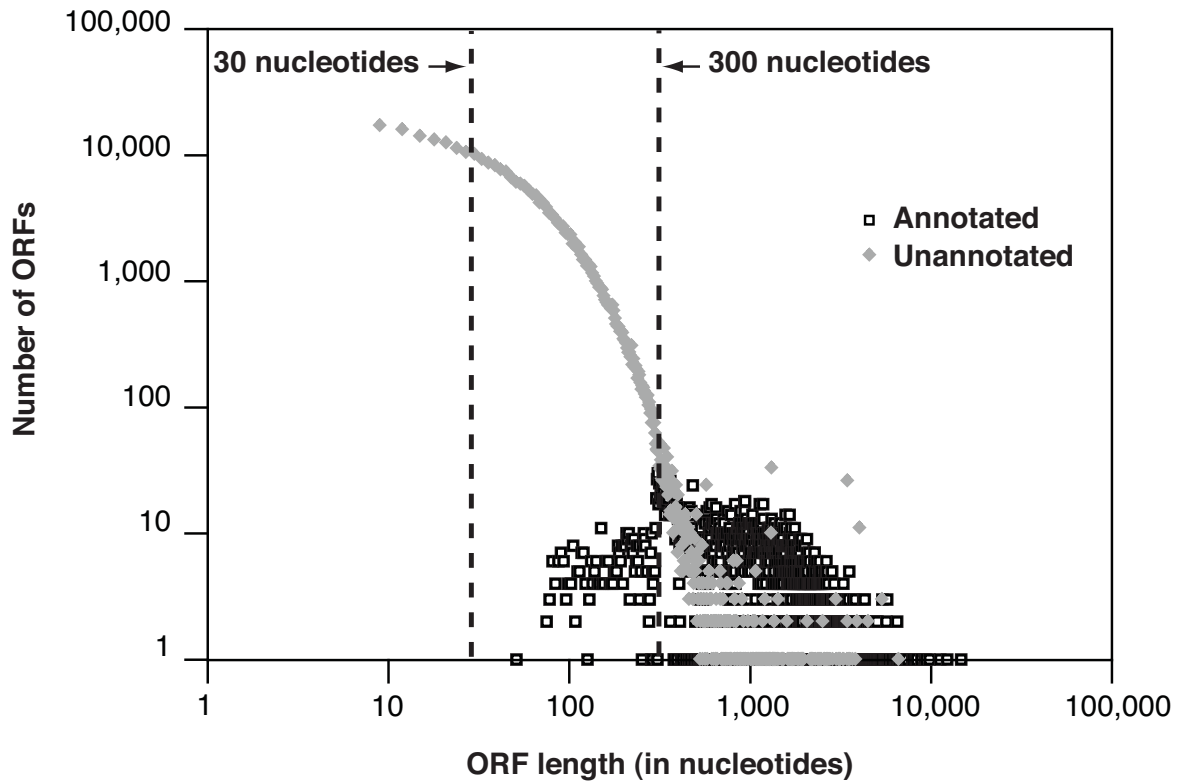

**Supplementary Fig. 1. Length distribution of annotated and unannotated ORFs in *S. cerevisiae* genome.** Unannotated ORFs are considered mostly non-genic, whereas annotated ORFs are considered mostly to be genes. We propose that both categories contain some proto-genes. The threshold of 300 nucleotides commonly used to annotate genes is indicated, as is the threshold of 30 nucleotides we selected to consider unannotated ORFs to be ORFs<sub>0</sub> together with other criteria. Of ~261,000 unannotated ORFs (containing at least three codons, *i.e.* one codon in addition to the start and stop codons), 1,805 have a length of 300 nucleotides or more. Of these, 652 (~36%) partially or fully overlap annotated ORFs on the same strand but in another reading frame, and 1,132 (~63%) on the complementary strand.

a

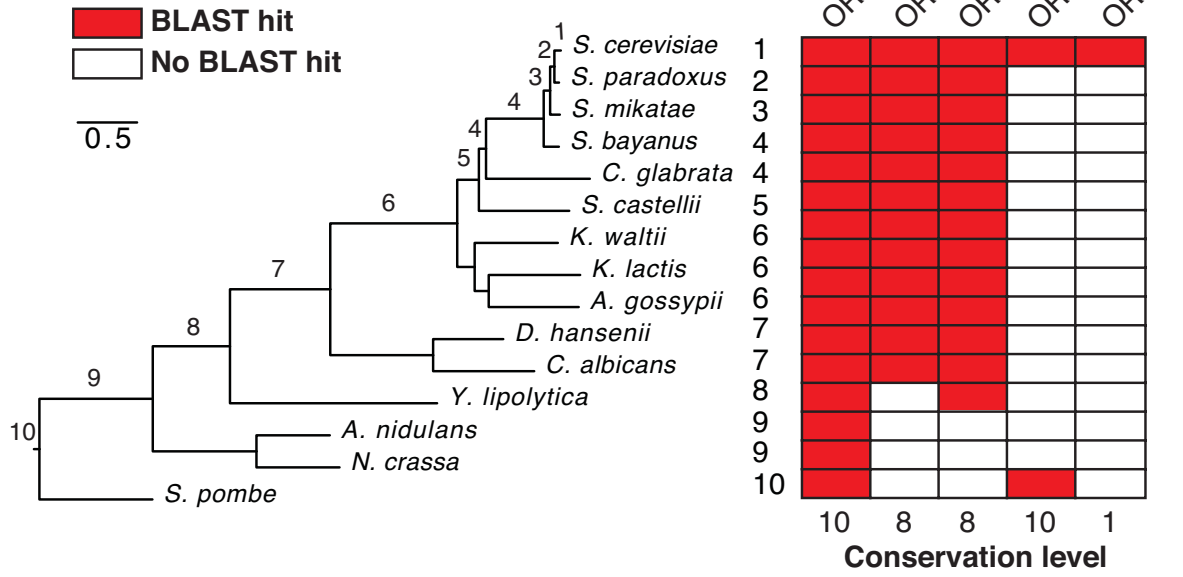

b

```

SCER ATG A A A T A C A T G G G G T C C T T C C T G A G G A A A G C G G C T A C A A C A A A T T A T T C A A T A - G C A T A A A A A A A A G G A A G G T A C A A A A C A G A G C C A T G T C A T A G
SPAR ATAGAGAATATGGGATCTTTCTGAGGTG-GCGGCTATTACAGTTTTTCGCCATAAGCATGAAAAAT-GGAACATACAAAACAGAAGTGAACATAC
SMIK AAAAAAAAAATGGGGTCTCTGTGAGGAA-GCGGCTAGCACACTTTTTGCGCATGAGT-TGA GAA ---- GAAGGTACATAACAGAGGCATATTATAC
SBAY AAGGAATATATAGGATAT-TAC TGA GAA --GCGGCTATAGCAGTTTTCTGTCTCGAG--TGAAAAATACGACATACAATTCCGAGGCATGAAATAC
  
```

c

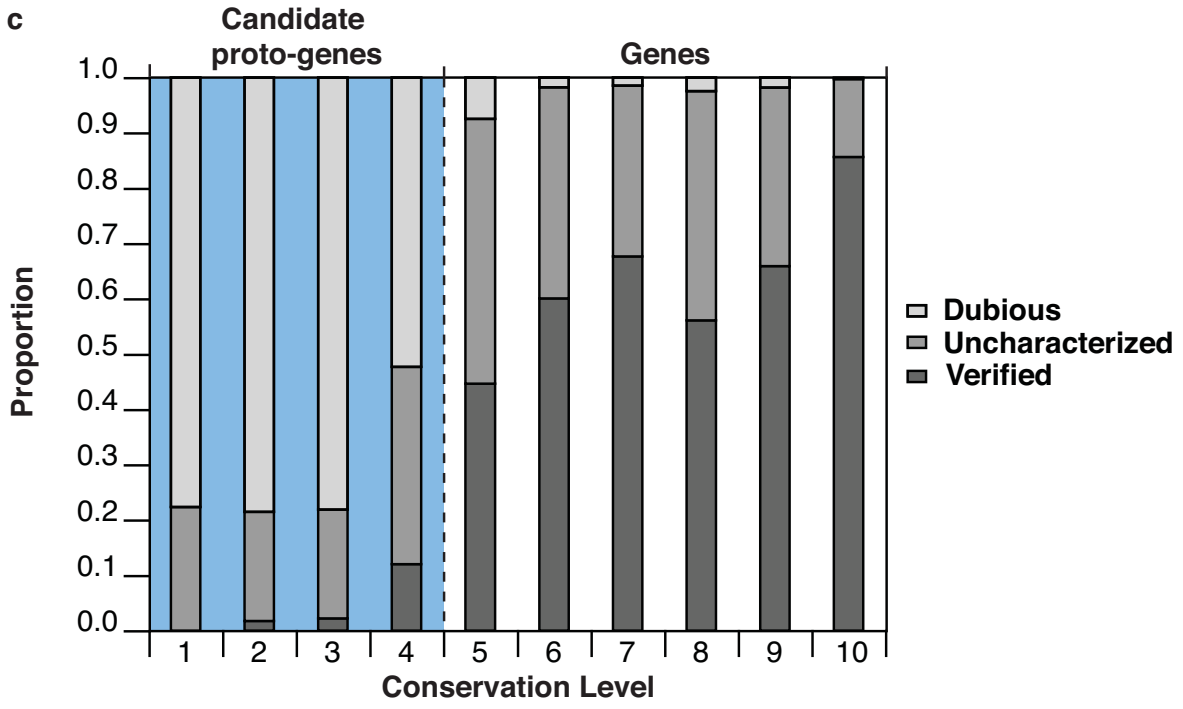

**Supplementary Fig. 2. Estimating the conservation level of annotated ORFs.** **a**, The sequence of every annotated ORF in *S. cerevisiae* (represented by the ORFs A, B, B', C and D, where ORFs B and B' are paralogues) is compared to every protein and nucleotide sequence of the 14 other yeast species in the phylogenetic tree (Supplementary Information). Positive sequence similarity hits are represented by red rectangles, and absence of positive hits by white rectangles. The 11 nodes along the *S. cerevisiae* lineage in this tree form 10 conservation levels. ORF A shares sequence similarity with every species in the tree, and is thus assigned the maximum level of conservation. ORF B shares sequence similarity with species up to *C. albicans* but since its paralogue ORF B' shares similarity with species up to *Y. lipolytica*, which corresponds to level 8 of conservation, ORF B is also assigned level 8 of conservation. ORF C only shares similarity with *S. pombe* and is assigned the level 10 of conservation, under the assumption that it is ancient and that it may have been lost from all the intermediary yeast species in the tree except *S. cerevisiae*, or that it is fast-evolving and thus difficult to detect in these intermediate genomes. ORF D does not share sequence similarity with any species in the tree; it is specific to *S. cerevisiae* and is assigned level 1 of conservation. **b**, Example of an ORF<sub>1</sub> (YOL038C-A). The 96 nucleotide ORF, presenting both start (orange box) and stop (black boxes) codons, is aligned with syntenic regions in three other *Saccharomyces sensu stricto* species (SCER: *S. cerevisiae*; SPAR: *S. paradoxus*; SMIK: *S. mikatae*; SBAY: *S. bayanus*). One A-to-G mutation in SPAR would suffice to generate a start codon, which would then lead to the emergence of an ORF. Translation from the position of the presumptive start codon in SMIK or SBAY species would engender prematurely terminated polypeptides. **c**, Annotation quality reflects conservation, with most ORFs<sub>5-10</sub> being verified genes. SGD classifies ORFs<sub>1-10</sub> into three categories partly based on conservation (text adapted from <http://www.yeastgenome.org/help/glossary.html>):

- Verified: ORFs<sub>1-10</sub> for which experimental evidence exists that a gene product is produced in *S. cerevisiae*. Most ORFs in this class have been given gene symbols (e.g., PAU8).
- Uncharacterized: ORFs<sub>1-10</sub> likely to encode an expressed protein, as suggested for instance by the existence of orthologues in one or more other species, but for which there are no specific experimental data demonstrating that a gene product is actually produced in *S. cerevisiae*. While most Uncharacterized ORFs<sub>1-10</sub> have systematic names only (e.g., YKL100C), a few have been given gene symbols. Evidence from large-scale analyses indicating that an ORF<sub>1-10</sub> may be biologically relevant is sometimes but not always enough to upgrade an ORF<sub>1-10</sub> from Uncharacterized to Verified.
- Dubious: ORFs<sub>1-10</sub> unlikely to encode an expressed protein. Dubious ORFs<sub>1-10</sub> may match some or all of the following criteria: 1) the ORF<sub>1-10</sub> is not conserved in other *sensu stricto* species; 2) there is no well-controlled, small-scale, published experimental evidence that a protein is produced; 3) a phenotype caused by disruption of the ORF<sub>1-10</sub> can be ascribed to mutation of an overlapping gene; 4) the ORF<sub>1-10</sub> does not contain an intron. Many ORFs<sub>1-10</sub> classified as Dubious are small and overlap a larger ORF<sub>1-10</sub> that is classified as Verified or Uncharacterized; however, overlap with another ORF<sub>1-10</sub> does not mandate that an ORF be classified as Dubious. Most ORFs<sub>1-4</sub> (66%) are classified as Dubious.

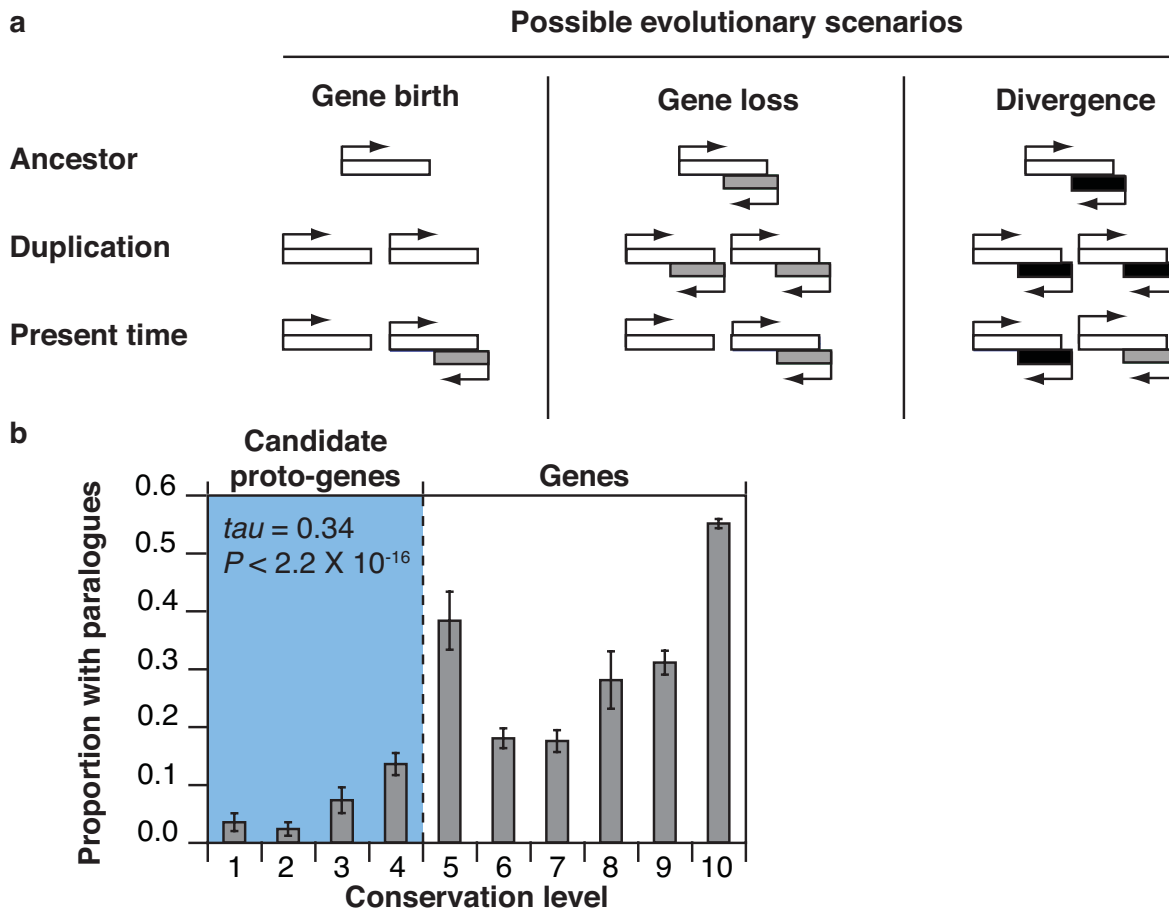

**Supplementary Fig. 3. Duplication events as controls for estimations of ORFs conservation level.** **a**, Distinguishing recent gene emergence from rapid sequence divergence. Three evolutionary scenarios lead to the same observation, namely that a gene that appears species-specific (grey boxes) overlaps a gene of higher conservation level (white boxes) which has a paralogue. Antisense overlap was chosen for representation purposes only. Left: the species-specific gene truly appeared recently, likely *de novo*. Right: the ancestor gene overlapped another gene (black) before duplicating and recent sequence divergence led to the illusion of species-specificity. Middle: the ancestor overlapped a gene before duplicating, but all the paralogues of this gene were independently lost; if all its orthologues and paralogues were also lost independently in the other yeast species, its sequence would appear species-specific although in reality it is of ancient origin. Only 4 out of 145 paralogues of ORFs<sub>10</sub> that overlap an ORF<sub>1</sub> also overlap another ORF<sub>1-10</sub>. Although the ORFs<sub>1</sub> could have recently and independently lost their paralogues, as well as all of their homologues in 14 other yeast species, the most parsimonious scenario is that they appeared recently, likely *de novo*, after and independently from the duplication events. **b**, Proportion of ORFs<sub>1-10</sub> with at least one paralogue. A positive correlation between conservation level and number of duplicates, with a peak reflecting the whole-genome duplication event<sup>31</sup>, confirms the accuracy of our conservation level estimations. Error bars: standard error of the proportion. *P* and *tau*: Kendall's correlation statistics.

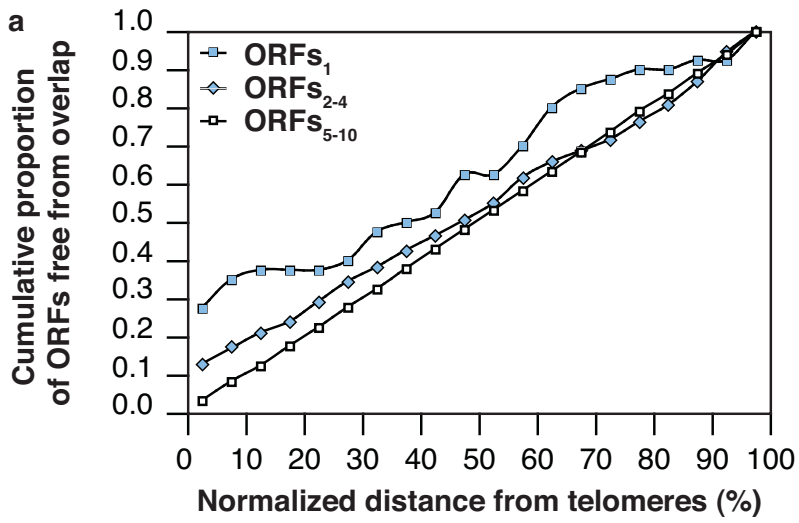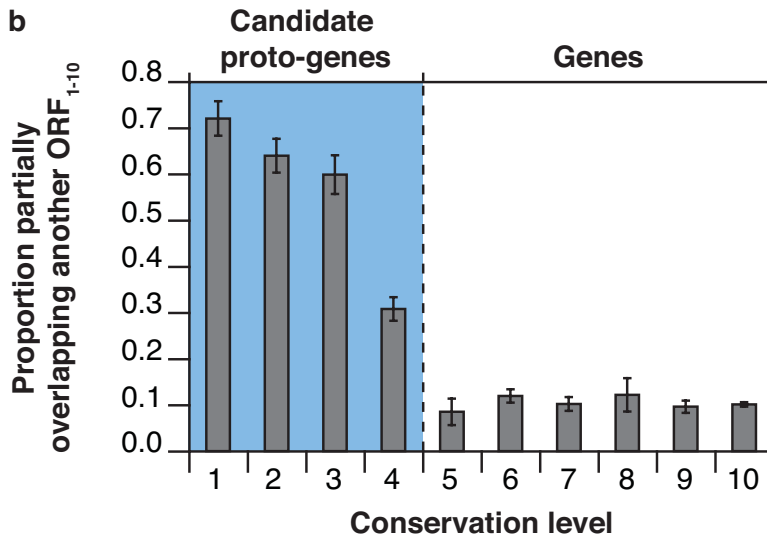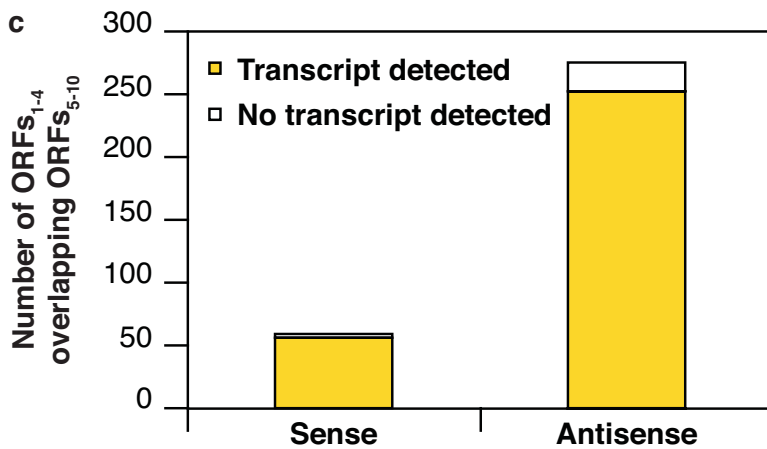

**Supplementary Fig. 4. Chromosomal locations of ORFs<sub>1-4</sub> are consistent with recent *de novo* origination.** **a**, Preferential subtelomeric location of non-overlapping ORFs<sub>1-4</sub>. Abscissa: distance between ORFs<sub>1-10</sub> and telomeres normalized by the distance between centromeres and telomeres, for all *S. cerevisiae* chromosomes, where 100% represents the total distance between the corresponding centromere and telomere. Ordinate: cumulative proportion of non-overlapping ORFs<sub>1</sub>, ORFs<sub>2-4</sub> and ORFs<sub>5-10</sub>. The high sequence variability of subtelomeric regions may facilitate *de novo* emergence. **b**, ORFs<sub>1-4</sub> tend to partially overlap ORFs<sub>1-10</sub>. Proportion of partially overlapping ORFs<sub>1-10</sub> as a function of conservation level. Fully overlapping ORFs<sub>1-10</sub> were excluded from the dataset. Error bars: standard error of the proportion. That ORFs<sub>1-4</sub> often partially overlap ORFs<sub>1-10</sub> argues against origination by cross-species transfer. Furthermore, since non-coding strands of genes are markedly depleted in stop codons<sup>32</sup> and may also offer more ready access to the transcription machinery, such chromosomal location could favour *de novo* origination. Examples of this “overprinting” mechanism have been described in vertebrates<sup>33</sup>. Finally, there are twice as many nucleotides in non-genic sequences that overlap an ORF<sub>1-10</sub> than in non-genic sequences that do not in the compact *S. cerevisiae* genome. **c**, Most overlapping ORFs<sub>1-4</sub> overlap an ORF<sub>5-10</sub> on the antisense strand. Transcript detection: unambiguous assignment of strand-specific RNAseq reads from rich or starvation conditions<sup>25</sup> to the ORFs<sub>1-4</sub> (Supplementary Fig. 6). The 48 ORFs<sub>1-4</sub> that overlap another ORF<sub>1-4</sub> are not taken into account in this analysis.

a

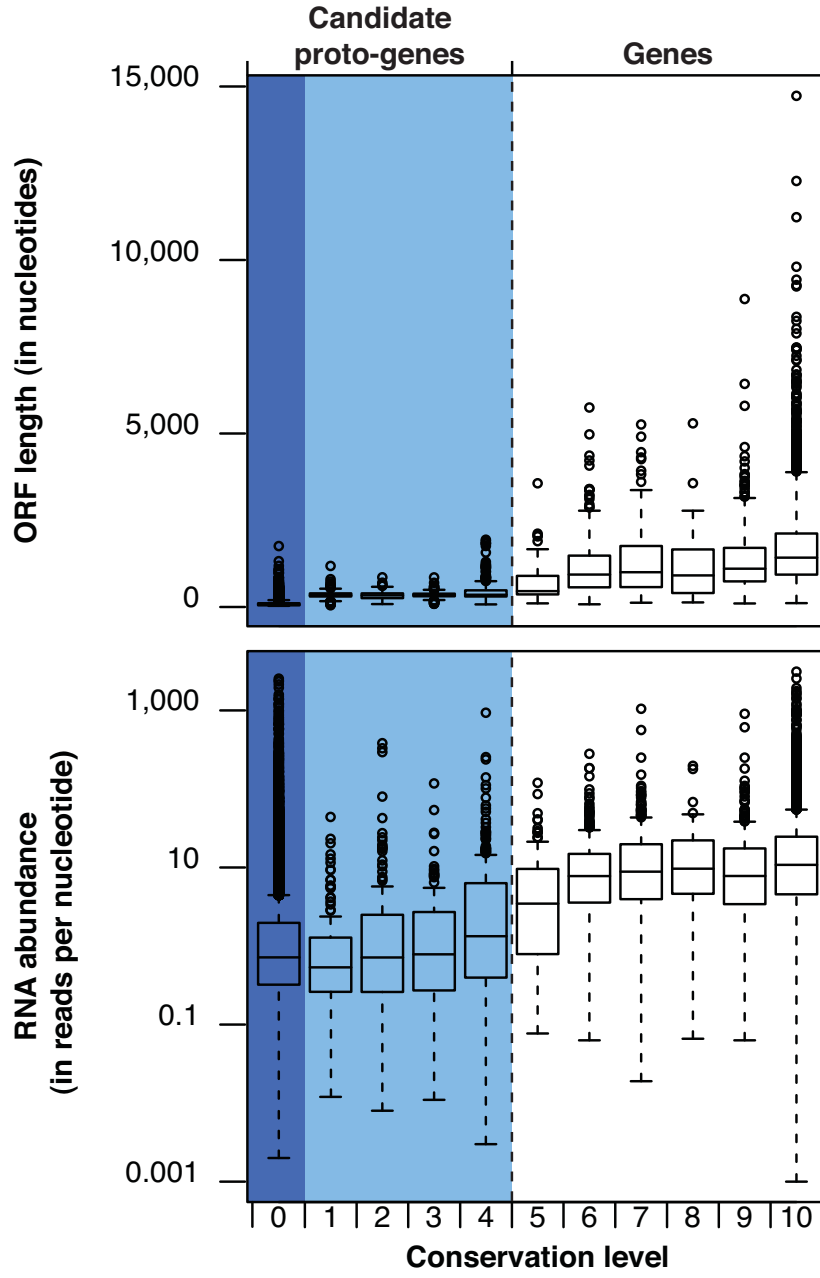



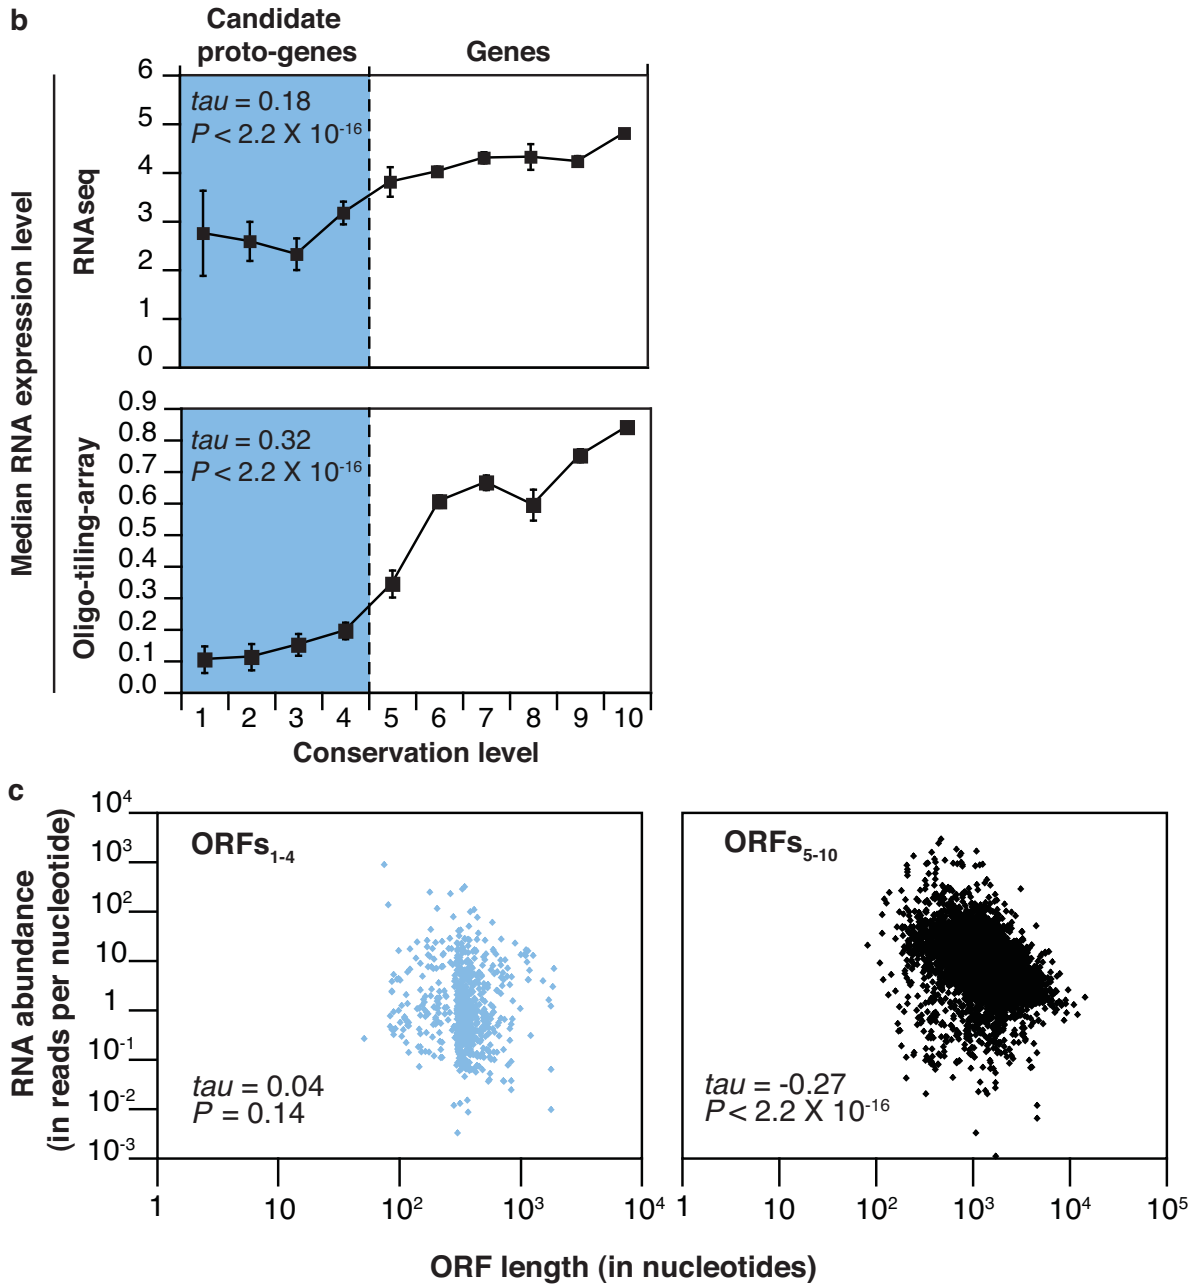

**Supplementary Fig. 5. Relationship between ORF expression level, conservation level and length.** **a**, Length (top) and expression level (bottom) of ORFs correlate positively with conservation level. Box plot representations of data presented in Fig. 2a. **b**, Median expression levels of ORFs<sub>1-10</sub> within each conservation level. Estimation of RNA abundance from RNAseq (upper panel)<sup>18</sup> and oligo-tiling array (lower panel)<sup>53</sup> (see Supplementary Information for description of the corresponding expression level units). Error bars represent s.e.m. **c**, A negative correlation between expression level and ORF length is observed for ORFs<sub>5-10</sub> but not for ORFs<sub>1-4</sub>. Estimation of RNA abundance from RNAseq<sup>25</sup> in rich conditions.  $P$  and  $\tau$ : Kendall's correlation statistics.

a

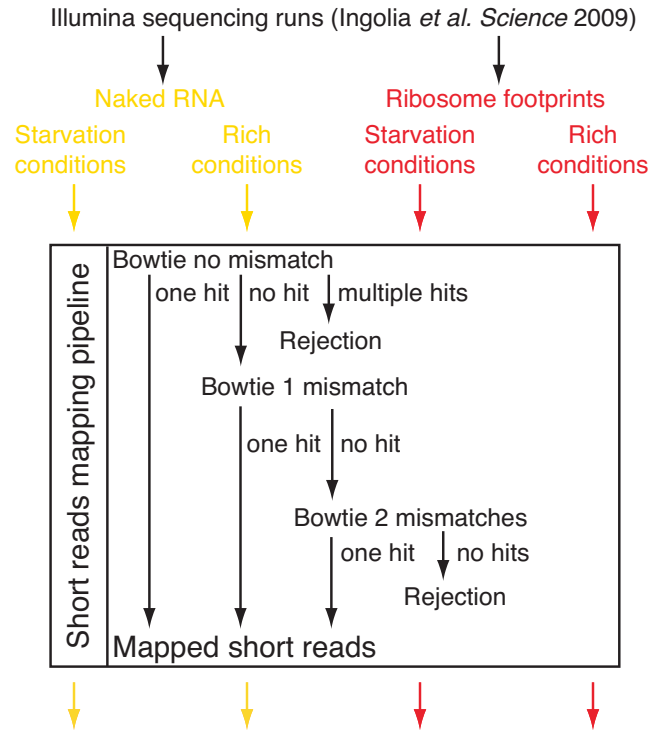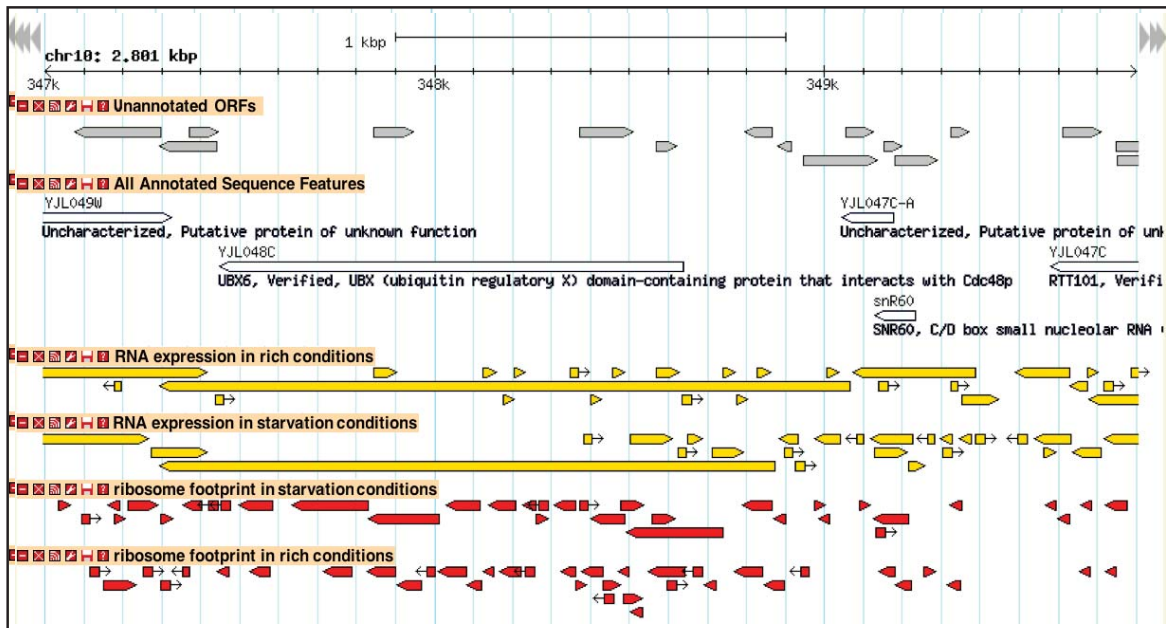

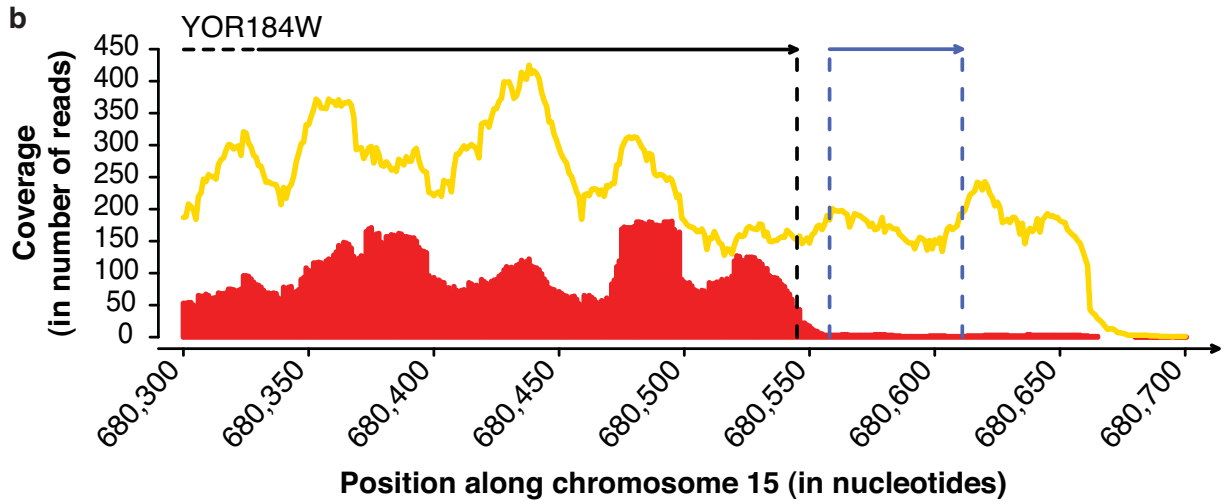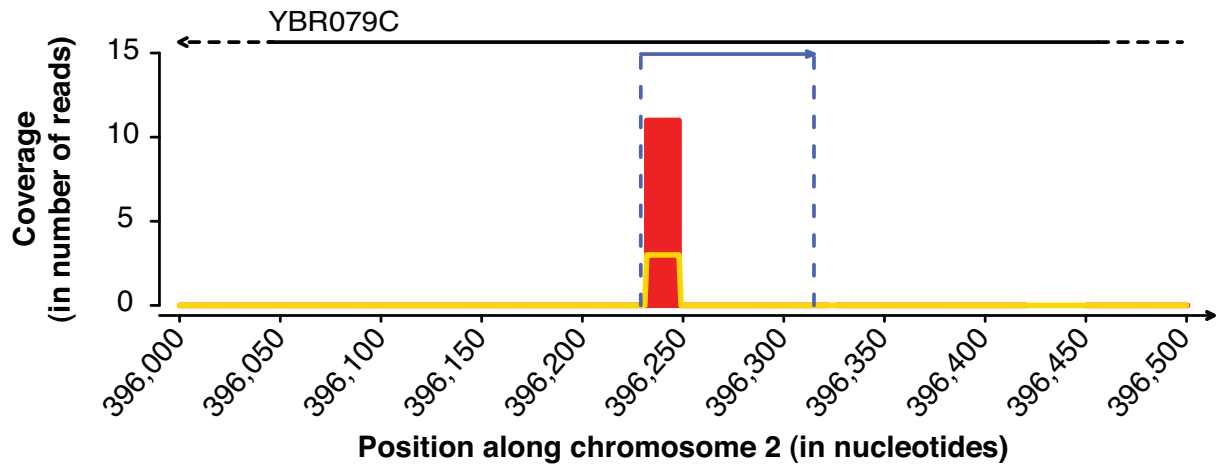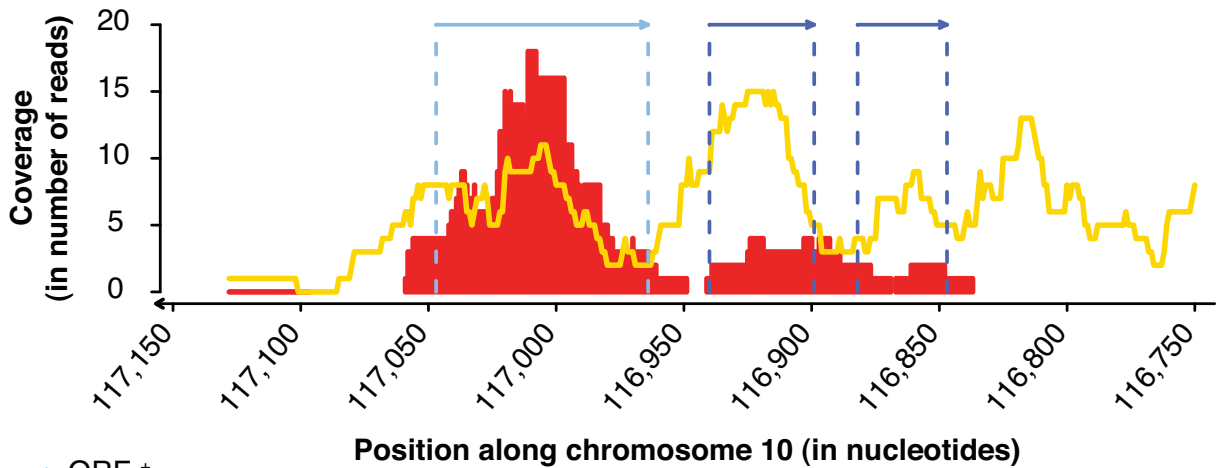

- ORF<sub>0</sub><sup>+</sup>
- ORF<sub>0</sub>
- ORF<sub>10</sub>
- RNAseq reads
- Footprint reads

c

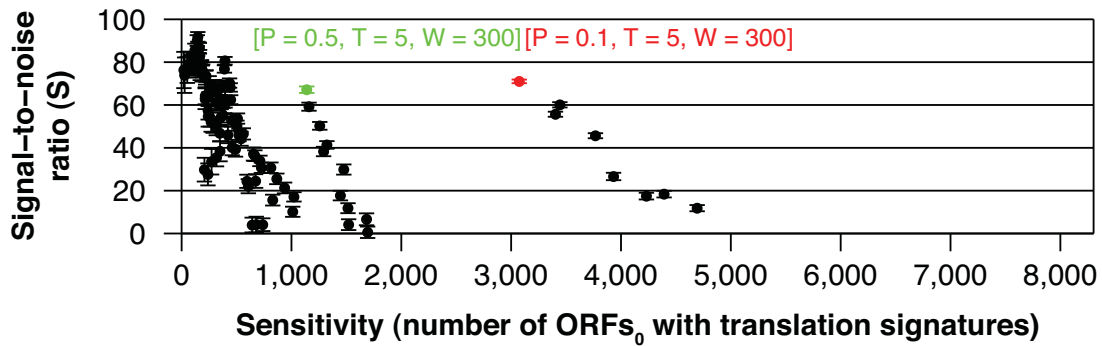

d

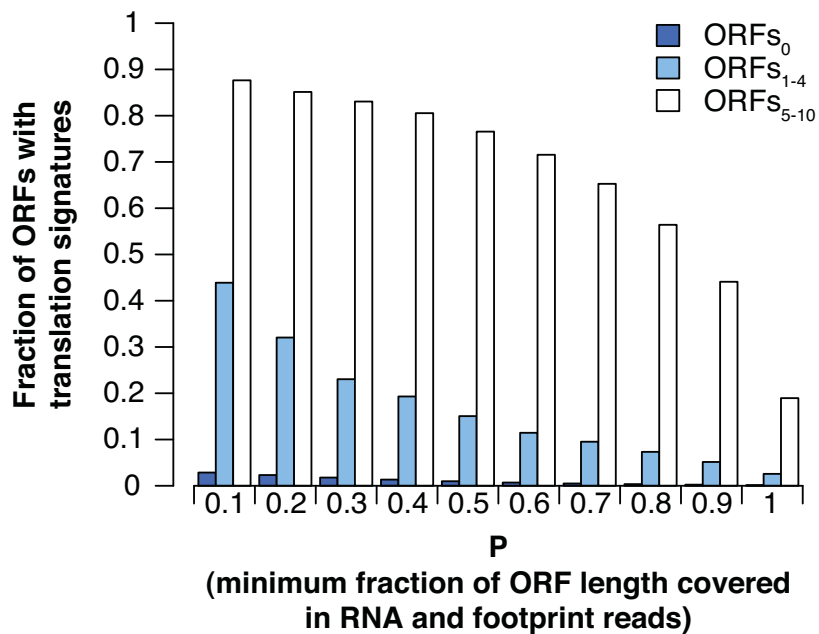

e

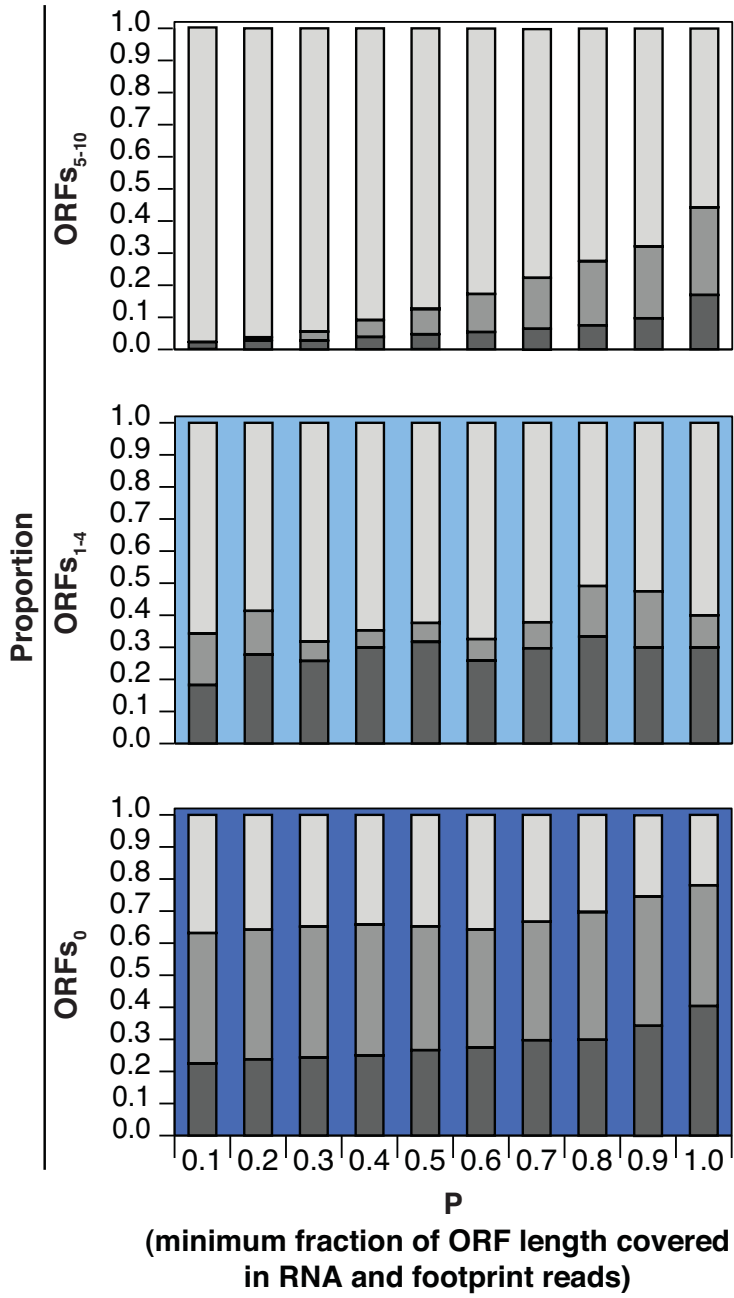

f

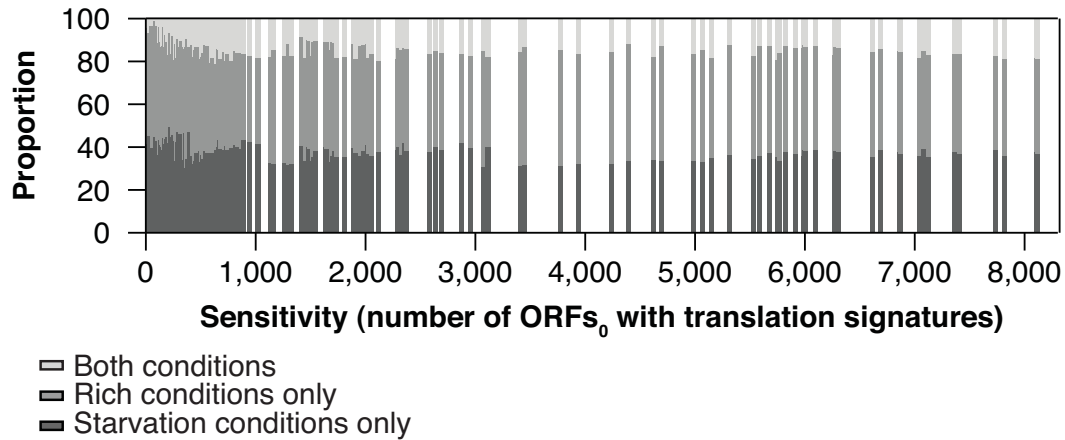

**Supplementary Fig. 6. Defining translation signatures of *S. cerevisiae* ORFs.** **a**, Bioinformatics pipeline for the mapping of short RNA and footprint sequence reads on the genome sequence of *S. cerevisiae*. Mapping visualization prepared with the SGD Genome Browser. **b**, Examples of true and false negatives. Top: True negative. The ORF<sub>0</sub> is located immediately downstream of an ORF<sub>10</sub>, suggesting that the corresponding transcription and translation signals could result from stop codon read-through. Middle: True negative. Only a small fraction of the ORF<sub>0</sub> is covered by RNA and footprint reads, which could reflect a ribosomal activity other than full-length ORF translation. Bottom: False negatives. Of the three represented ORFs<sub>0</sub>, only one (labelled ORF<sub>0</sub><sup>+</sup>) is considered translated, as a result of the stringent criteria used. **c**, The signal-to-noise ratios of 91 parameter sets that reject null model 1 and 2 are shown. Error bars represent s.e.m. **d**, Translation of candidate proto-genes. The number of ORFs showing translation signatures is shown when various P parameters are applied. For ORFs<sub>0</sub>, T = 5 and W = 300 across all values of P. With P ≥ 0.5, 1,139 ORFs<sub>0</sub>, 117 ORFs<sub>1-4</sub> and 4,545 ORFs<sub>5-10</sub> show evidence of translation. **e**, Condition-specific translation of candidate proto-genes, but not of ORFs<sub>5-10</sub>, is robust to variations of P. For ORFs<sub>0</sub>, T = 5 and W = 300 across all values of P. **f**, Condition-specific translation of ORFs<sub>0</sub> is observed with 168 combination of P, T and W. Each tricolour column corresponds to one parameter set.

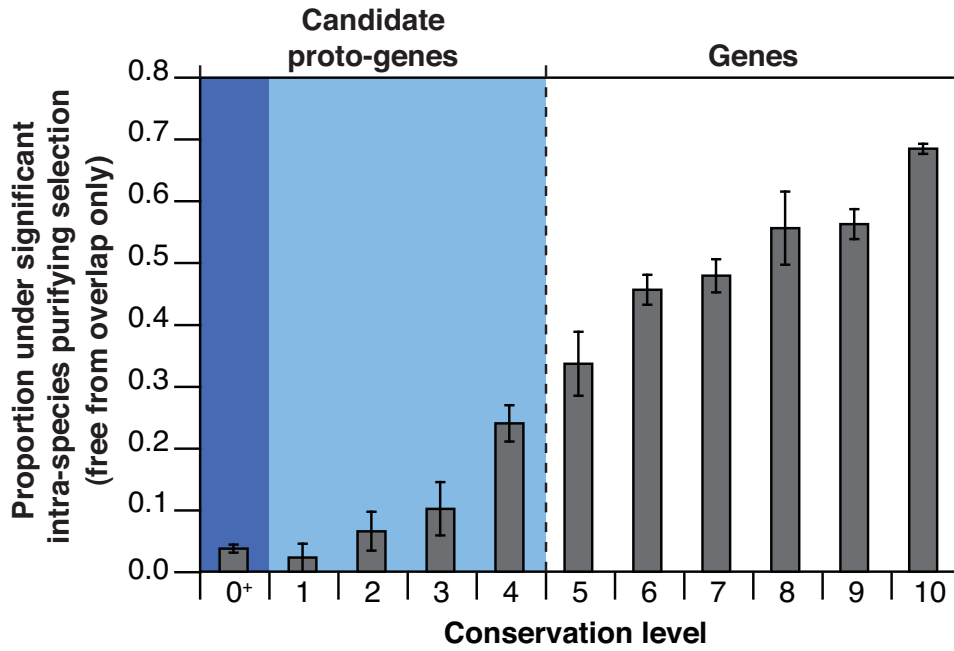

**Supplementary Fig. 7. Signatures of intra-species purifying selection among ORFs free from overlap with annotated ORFs.** Error bars represent standard error of the proportion.

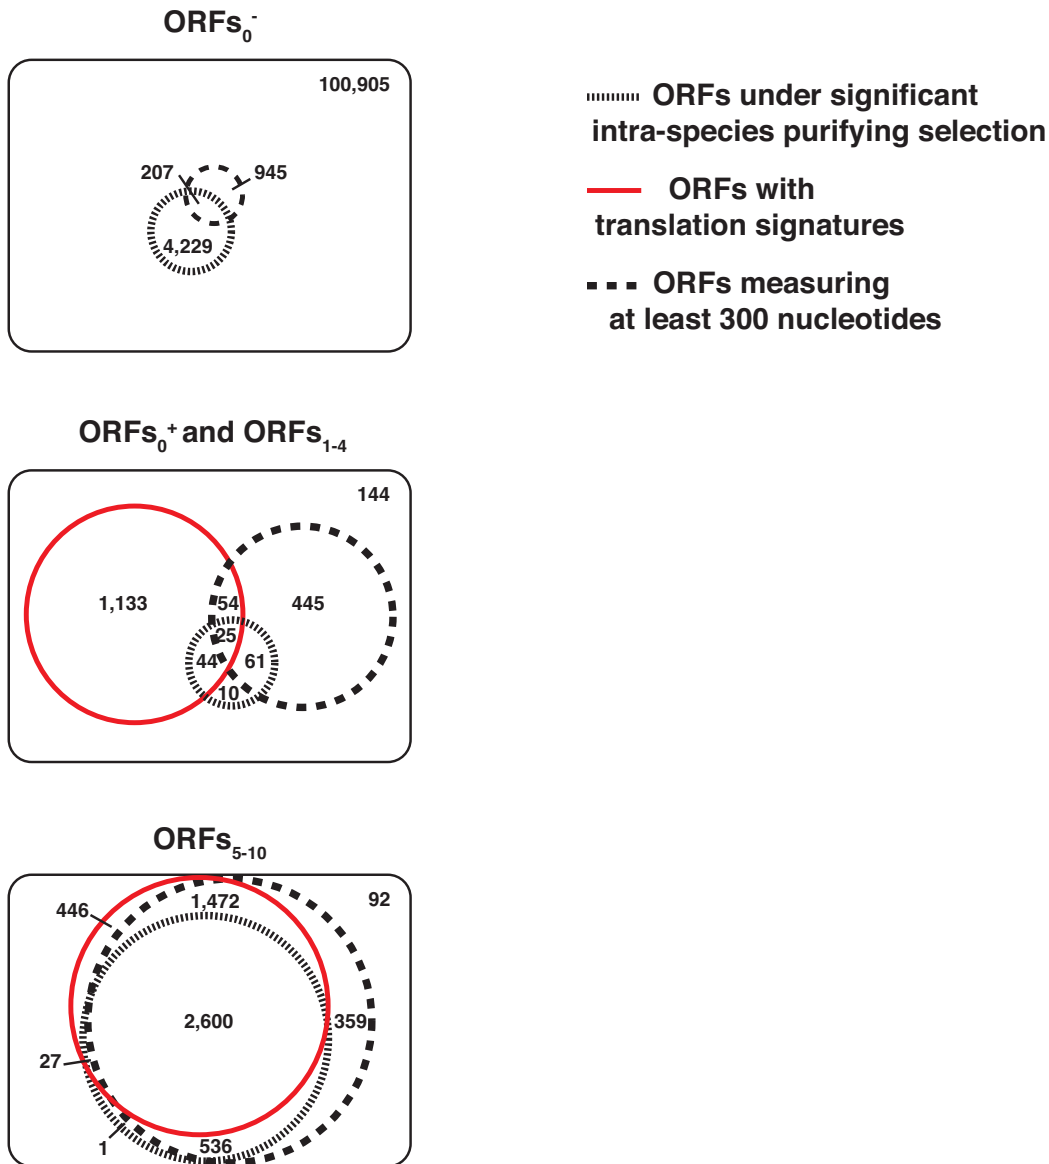

**Supplementary Fig. 8. Characterization of 113,735 *S. cerevisiae* ORFs by their conservation, length, translation and retention by natural selection.** Top: 106,286 unannotated ORFs that do not show signatures of translation (ORFs<sub>0</sub><sup>-</sup>). Middle: 1,916 candidate proto-genes consisting of 1,139 unannotated ORFs that show signatures of translation (ORFs<sub>0</sub><sup>+</sup>) and 777 weakly conserved annotated ORFs (ORFs<sub>1-4</sub>). Bottom: 5,533 conserved annotated ORFs (ORFs<sub>5-10</sub>). ORFs presenting in-frame stop codons in any *S. cerevisiae* strain were considered as not undergoing significant purifying selection. Venn diagrams are not drawn to scale.



## Supplementary Methods

### Supplementary Methods 1: Sequence analyses and evolutionary interpretations

We compared the sequence of the S288C reference strain of *S. cerevisiae* with i) sequences of 14 other yeast species and ii) sequences of seven other strains of *S. cerevisiae*. We used the reference genome sequences and accompanying annotations downloaded in October 2007 by the *Saccharomyces* Genome Resequencing Project group (SGRP)<sup>34</sup> from the *Saccharomyces* Genome Database (SGD)<sup>16</sup>. Paralogy relationships among annotated open reading frames (ORFs) of *S. cerevisiae* were downloaded from the Ensembl Compara website<sup>35</sup>.

#### Comparative analysis between yeast species

To evaluate the evolutionary time-frame at which the ancestor sequence of each annotated ORF most likely appeared, we compared the nucleotide and amino acid sequences of each annotated ORF with sequences from 14 other yeast species (*Saccharomyces paradoxus*, *Saccharomyces mikatae*, *Saccharomyces bayanus*, *Candida glabrata*, *Saccharomyces castellii*, *Kluyveromyces lactis*, *Ashbya (Eremothecium) gossypii*, *Kluyveromyces (Lachancea) waltii*, *Debaryomyces hansenii*, *Yarrowia lipolytica*, *Candida albicans*, *Aspergillus nidulans*, *Neurospora crassa*, and *Schizosaccharomyces pombe*) that we

mapped on an evolutionary tree (Fig. 1c and Supplementary Fig. 2). Sequences, annotations and orthology relationships for these species were downloaded in September 2007 from websites listed at <http://www.broad.mit.edu/regev/orthogroups/><sup>36</sup>.

### **Generation of the evolutionary tree**

To infer the phylogeny of the 15 yeast species, we first used the MUSCLE alignment software<sup>37</sup> to align all one-to-one orthologues across these species, and concatenated these alignments. We then created 1,218 hypothetical peptide alignments by sampling each time 10,000 positions from this concatenated alignment. The phylogeny was reconstructed using the maximum likelihood method as implemented in the proml program of the PHYLIP software package<sup>38</sup>. This sampling process was repeated 10 times, generating the same phylogeny each time, with the exception of the nodes separating *S. castellii*, *C. glabrata*, and the *Saccharomyces sensu stricto* species. Reconstructions sometimes indicated that *S. castellii* was monophyletic with the *Saccharomyces sensu stricto* group, and sometimes that *S. castellii* was more closely related to *C. glabrata*. We decided to consider the *Saccharomyces sensu stricto* group more closely related to *C. glabrata* than to *S. castellii*, based on prior genome reconstructions<sup>39</sup>.

### **Conservation level calculations**

We classified *S. cerevisiae* ORFs within 11 levels of conservation, numbered

from 0 to 10 according to the phylostratigraphy principle<sup>1</sup>.

Level 0 contains 107,425 unannotated ORFs (ORFs<sub>0</sub>), defined as any sequence between canonical start and stop codons that is i) longer than 30 nucleotides, ii) a multiple of three, iii) not overlapping an annotated ORF, an rRNA, a tRNA, a ncRNA, a snoRNA or an upstream ORF<sup>25</sup> on the same strand. We did not include ORFs of length shorter than 30 nucleotides in the set of ORFs<sub>0</sub> because they would have prevented all of the analyses performed in this manuscript that involve sequence analyses tools such as BLAST, which are challenged when applied to very short sequences. Unannotated ORFs overlapping an annotated sequence feature on the same strand were also excluded from the set of ORFs<sub>0</sub> because their conservation level would be indistinguishable from that of the features they overlap, and because other analyses performed throughout the manuscript could not have been applied readily (*i.e.* estimations of strength of purifying selection or estimations of expression level).

The conservation level of each annotated ORF was defined as the depth of the node separating *S. cerevisiae* from the most distant species in which any sequence similarity with this ORF, or any of its paralogues, could be detected. Finding such similarities for each annotated ORF required the following steps: i) extracting the ORF-specific sequence that did not overlap another annotated ORF; ii) matching this sequence against genomic and protein sequences from each of the other yeast species one by one, using three distinct BLAST programs (BLASTP, TBLASTX, TBLASTN)<sup>40</sup> with a relaxed *E* value threshold of less than

0.01; iii) measuring the depth of the node separating *S. cerevisiae* and the species showing a positive hit for the ORF sequence. The greatest depth value was marked as the conservation level of the ORF, except when the ORF had a more conserved paralogue.

We encountered a class of annotated ORFs that, while conserved only up to a certain level in the phylogeny of yeasts, had paralogues that were more conserved. Members of this class may have first evolved *de novo*, then duplicated and fused to pre-existing genes, in a mechanism similar to that which apparently gave birth to the *Drosophila* gene *Jingwei*<sup>41</sup>. An alternative would be that a portion of conserved ORFs diverged first, and subsequent duplication events engendered seemingly younger ORFs. We opted for the latter scenario, and assigned to each annotated ORF the conservation level of its most conserved paralogue, in an effort to avoid underestimating conservation.

Only five *S. cerevisiae* annotated ORFs had homologues in *C. glabrata* but not in *S. castellii*, which can be explained by the small size of the *C. glabrata* genome, or by the short evolutionary distance between *C. glabrata* and *S. castellii* as measured by sequence similarity. To avoid counting five ORFs as an entire category, we grouped them with the immediate lower conservation level (Supplementary Fig. 2). For simplification, *C. glabrata* is not represented in Fig. 1c. Annotated ORFs are classified within 10 levels of conservation, numbered from 1 to 10 (ORFs<sub>1-10</sub>).

A caveat is the potential incompleteness of some genome sequences used for the comparisons. Furthermore, whole genome sequences from other

species that belong to the Ascomycota phylogeny are not available. For this reason, we found that ~5% of ORFs<sub>1-4</sub> were potentially more conserved when we used BLASTP against the non-redundant protein database of NCBI with relaxed parameters (using an *E* value threshold of 10<sup>-6</sup> and imposing that at least 30% of the query sequence length was aligned). As expected, ORFs<sub>0</sub> were mostly species-specific, with only <1% having homologues outside of *S. cerevisiae* according to the same procedure. Results were robust to slight modifications of the method (different BLAST programs, different *E* value cutoffs).

### ***Evaluating the evolutionary origin of ORFs<sub>0</sub><sup>+</sup>***

We have found 1,139 ORFs<sub>0</sub> that show signatures of translation (ORFs<sub>0</sub><sup>+</sup>, see “Ribosome footprinting” subsection). To be considered as proto-genes, ORFs<sub>0</sub><sup>+</sup> must have recently emerged in non-genic sequences. To verify that ORFs<sub>0</sub><sup>+</sup> did not originate from gene duplication, we compared their amino acid sequences to that of all annotated ORFs in *S. cerevisiae* using relaxed parameters (BLASTP with *E* value cutoff of 0.01). None of the ORFs<sub>0</sub><sup>+</sup> resembled an annotated ORF, and only one was similar to transposable element genes. We further compared the amino acid sequences of ORFs<sub>0</sub><sup>+</sup> to that of all annotated ORFs in 14 Ascomycota species using relaxed parameters (BLASTP with *E* value cutoff of 0.01). We found only one ORF<sub>0</sub><sup>+</sup> that resembled any annotated ORFs in the *Saccharomyces sensu stricto* group and none that resembled annotated ORFs outside of this group. The absence of annotated paralogues or orthologues for ORFs<sub>0</sub><sup>+</sup> throughout the *S. cerevisiae* lineage suggests that ORFs<sub>0</sub><sup>+</sup> did not

originate from gene duplication. Yet, ORFs<sub>0</sub><sup>+</sup> could be genes that have not been annotated in any of the 14 studied species because of their short length. To test whether this could be true, we compared the amino acid sequences of ORFs<sub>0</sub><sup>+</sup> to the six-frame translation products of the genomes of the 14 species using more stringent parameters (TBLASTN either with *E* value cutoff of 0.01, which is stringent given the size of the sequence database, or 90% identical sequences over 100% of the length of the ORF). We found 136 ORFs<sub>0</sub><sup>+</sup> that have similarity with sequences in the *Saccharomyces sensu stricto* group, and 20 that seem more conserved. However, these 20 ORFs<sub>0</sub><sup>+</sup> did not present evolutionarily conserved start and stop codons and hence are unlikely to be genes that had remained unannotated because of their short length. In conclusion, ORFs<sub>0</sub><sup>+</sup> seem to have recently emerged in non-genic sequences, and can confidently be considered as proto-genes (see “Potential associations with cross-species transfer events” subsection).

### **Comparative analysis of *S. cerevisiae* strains**

To examine intra-species evolution of *S. cerevisiae* ORFs, we compared ORF sequences in the reference strain (S288C) to their sequences in seven other strains (SK1, Y55, DBVPG6765, DBVPG1373, DBVPG6044, YPS606 and W303). Single Nucleotide Polymorphisms (SNPs) from these strains were downloaded from the website of the Sanger Institute *Saccharomyces* Genome Resequencing Project (<http://www.sanger.ac.uk/Teams/Team71/durbin/>)<sup>34</sup> in March 2010. Sequenced SNPs were analyzed only when their quality score was

higher than 55, as described<sup>34</sup>.

A total of 105,023 ORFs<sub>0</sub> and 5,723 ORFs<sub>1-10</sub> (including 137 ORFs<sub>1</sub>) were present in the eight strains (no disruptive mutations). The strength of selective constraints acting on each of these ORFs was evaluated in two steps: i) homologous nucleotide sequences in each strain were aligned using the MUSCLE program<sup>37</sup>; ii) for each ORF we ran the codeml program of PAML<sup>42</sup> using the JTT substitution matrix to calculate the synonymous (dS) and non-synonymous (dN) substitution rates and to estimate the likelihood of the dN/dS ratio of the ORF given the polymorphism of its sequence across the eight *S. cerevisiae* strains. We recorded this likelihood under two parameter settings. In the first null model setting, the program estimated the likelihood of the data while assuming that the ORF was under neutral selection and that the rates of synonymous and non-synonymous substitutions would be equal ( $\omega = 1$ ). In the second setting, the program returned the likelihood of the data without making this assumption. To obtain a *P* value, we assumed that the log ratio between these likelihoods is chi-square distributed with one degree of freedom. This likelihood ratio test estimated whether the observed substitution rates for the given ORF deviated significantly from neutral expectation. All ORFs with  $dN/dS < 1$  and  $P < 0.05$  were considered to be under significant purifying selection.

### **Potential associations with cross-species transfer events**

In *S. cerevisiae*, cross-species transfers (or horizontal gene transfers, HGT) mediated by viruses, or coming from bacteria, are notably rare and the

mechanisms involved are poorly understood. To estimate the maximum proportion of ORFs<sub>1-4</sub> that could have originated from HGT, we first reviewed the literature and found four ORFs<sub>1-4</sub> that likely originated from HGT<sup>43,44</sup>.

We next searched the non-redundant database of protein sequences using stringent parameters (using BLASTP with an *E* value threshold of  $10^{-6}$  and imposing that at least 30% of the query length was aligned). This process revealed four additional ORFs<sub>1-4</sub> that may be associated with cross-species transfer because homologues were found outside of the fungi kingdom. Two of them overlapped another ORF, complicating the interpretation of these results.

Transposable elements have been used as a signature of local genomic instability where foreign DNA could be integrated. To find additional candidates for HGT, we surveyed the chromosomal environments of ORFs<sub>1-10</sub>, focusing on non-overlapping ORFs<sub>1-10</sub> (overlapping ORFs<sub>1-10</sub> are unlikely to have originated from HGT). The number of ORFs<sub>1-4</sub> located in the neighbourhood of a transposable element (within a 2,000 nucleotide window from the start or the stop codon) was not significantly different than for ORFs<sub>5-10</sub>. The 13 corresponding ORFs<sub>1-4</sub> were nevertheless added to the cases described above to constitute a group of 21 ORFs<sub>1-4</sub> for which a potential link with HGT could not be ruled out. Note that seven other potential cases of HGT in *S. cerevisiae* described in the literature<sup>45</sup> involve ORFs<sub>5-10</sub> that are not located in the vicinity of a transposable element.

While 34 ORFs<sub>0</sub><sup>+</sup> were located within 2,000 nucleotides of a transposable element, the overall location of ORFs<sub>0</sub><sup>+</sup> relative to transposable elements showed



no significant deviation from that of ORFs<sub>1-10</sub>. Furthermore, ORFs<sub>0</sub><sup>+</sup> encoded polypeptides specific to *S. cerevisiae* according to available genomic databases containing bacterial and viral sequences (BLASTP against the NR database with a relaxed *E* value cutoff of 0.01), also supporting their *de novo* origination rather than origination from HGT.

### **Comparing ORFs<sub>0</sub><sup>+</sup> and other ORFs<sub>0</sub>**

We investigated whether ORFs<sub>0</sub><sup>+</sup> were in any way different from other ORFs<sub>0</sub>. When comparing their sequences among the eight *S. cerevisiae* strains, we did not observe any significant difference in average number of SNPs, measures of strength of purifying selection, or propensity for disruptive mutations. ORFs<sub>0</sub><sup>+</sup> exhibited significantly shorter length distribution than ORFs<sub>0</sub> according to a Kolmogorov-Smirnov test ( $P < 2.2 \times 10^{-16}$ ) as well as a slightly but significantly higher codon adaptation index. The amino acid composition of ORFs<sub>0</sub><sup>+</sup> did not appear to fall between that of other ORFs<sub>0</sub> and of ORFs<sub>1-4</sub>, although the amino acid composition of ORFs<sub>1-4</sub> did tend to fall between that of ORFs<sub>0</sub><sup>+</sup> and of ORFs<sub>5-10</sub>. ORFs<sub>0</sub><sup>+</sup> were strikingly lysine-rich relative to other ORFs<sub>0</sub> and to ORFs<sub>1-10</sub>. Hence, ORFs<sub>0</sub><sup>+</sup> are not a random sample of ORFs<sub>0</sub>, and likely have a cellular role in addition to their evolutionary potential.

### **Sequence properties related to translation**

The TMHMM<sup>46</sup> program was used to predict putative transmembrane regions. The DISOPRED2<sup>47</sup> program was used to predict disordered regions after

removing predicted transmembrane regions and coiled coil regions predicted with COILS<sup>48</sup>, as previously described<sup>49</sup>. The general average hydrophobicity (or GRAVY score) was calculated as the arithmetic mean of the sum of the hydrophobic indices of each amino acid<sup>50</sup>, as provided by SGD<sup>16</sup>. Codon adaptation index was evaluated using the original methodology<sup>51</sup>. To assess the AUG context optimality, we considered the presence or absence of an adenine in position -3 relative to the AUG start codon<sup>52</sup>.

## **Supplementary Methods 2: Integration with external datasets**

### **RNA abundance**

Transcription levels of *S. cerevisiae* ORFs were estimated from three published genome-wide datasets, which used two distinct strand-specific experimental techniques: oligo-tiling array<sup>53</sup>, and RNAseq<sup>17,25</sup>. In the oligo-tiling array dataset, the normalized intensity of expression per probe was averaged, and the percentage of probes within an ORF<sub>1-10</sub> with intensity higher than this average was defined as the expression level of this ORF<sub>1-10</sub>. Estimations of expression level by RNAseq<sup>17</sup> (Supplementary Fig. 5) were not reprocessed. For RNAseq<sup>25</sup> (Fig. 2a), estimations of expression level correspond to the number of sequencing reads from the transcriptome experiment in rich conditions which map to each ORF (next subsection), normalized by the length of the ORF in nucleotides.

### **Ribosome footprinting**

Our evolutionary model predicts that a subset of ORFs<sub>0</sub> should be translated. Given i) the size, ii) the biased amino acid composition, iii) the differential translation and iv) the unannotated status of ORFs<sub>0</sub>, proteomics identification of the corresponding peptides is not feasible without considerably adapting state-of-the-art technologies to our particular goal, both in terms of experimental set-up and of computational analysis (N. Kulak and M. Mann, personal communication). We thus searched instead for signatures of translation in a ribosome footprinting dataset<sup>25</sup>.

### ***Sequencing reads alignment***

Raw reads from ribosome footprinting experiments<sup>25</sup> were downloaded from the Short Read Archive maintained by NCBI<sup>54</sup>, stored with accession number SRA008252. The initial analysis<sup>25</sup> discarded the reads mapping to dubious ORFs and other overlapping features, but these reads were necessary for our purposes. Therefore, all the sequencing reads were re-mapped to the reference genome with the Bowtie short read mapping program<sup>55</sup> using the first 25 nucleotides as the 'seed' region. Reads with multiple matches to the reference genome were discarded. To maximize the matched reads, reads that had failed to map with no mismatches in the seed region were fed again into Bowtie, allowing one mismatch in the seed region, and those that still failed to align were mapped with two mismatches in the seed region. In total 85-95% of the reads could be aligned to the reference genome. Short read runs were subsequently

grouped into four categories: ribosome footprinting in rich conditions (eight runs), ribosome footprinting in amino acid starvation conditions (six runs), and corresponding RNAseq runs (rich, four runs and starvation, three runs). All the runs in each group were merged to create a single mapping file (Supplementary Fig. 6).

### ***Detection of translation signatures***

The mapping of footprint reads to ORFs<sub>0</sub> does not necessarily indicate full-length, ORF-specific translation<sup>6,25</sup>. For example, stop codon read-through may produce footprint reads that fully cover an ORF<sub>0</sub> despite being associated with a nearby ORF<sub>10</sub> (Supplementary Fig. 6).

To detect unequivocal translation signatures in ORFs<sub>0</sub>, we developed a bioinformatics pipeline optimizing three parameters with regards to two null models for the observation of footprint reads that map to ORFs<sub>0</sub>. The three parameters we took into account are:

- P, a minimum proportion of ORF length covered in RNA and footprint reads
- T, a minimum factor by which the number of footprint reads per nucleotide in the ORF is strictly higher than the number of footprint reads per nucleotide in the surrounding up- and downstream windows
- W, the size of the windows in nucleotides

Any two ORFs<sub>0</sub> that partially overlap on the same strand and show translation signatures in the same experimental conditions were both eliminated from the set of ORFs<sub>0</sub> considered to show translation signatures.

We considered the following two null models:

- Null model 1: the detected presence of ribosomes on non-genic sequences is not related to the presence of ORFs<sub>0</sub> (the ribosome binds the corresponding transcript for a biological purpose which is not to translate ORFs<sub>0</sub>)
- Null model 2: the ribosome footprinting assay suffers from technical artifacts, and footprint reads observed outside of annotated ORFs are non-specific.

We compared the observed number of ORFs<sub>0</sub> showing translation signatures to the number of ORFs<sub>0</sub> expected to show translation signatures under each of the two null models when translation signatures are defined by any of 168 combinations of the three parameters:

- P : (0.1, 0.5, 0.8, 1)
- T : (1, 1.5, 2, 3, 4, 5)
- W : (10, 20, 30, 50, 100, 200, 300)

To evaluate the number of ORFs<sub>0</sub> expected to show translation signatures under null model 1, we randomized the positions of ORFs<sub>0</sub> throughout non-genic sequences while maintaining the length distribution of ORFs<sub>0</sub> and the observed

positions of RNA and footprint reads. To evaluate the number of ORFs<sub>0</sub> expected to show translation signatures under null model 2, we randomized the positions of footprint reads throughout non-genic sequences while maintaining the length distribution of footprint reads, the positions of RNA reads and the positions of ORFs<sub>0</sub>. We performed 20 simulations per null model per parameter set, and 80 additional simulations per null model for the parameter set shown in Fig. 3b, *i.e.* 6,880 genome-wide simulations. The corresponding algorithms are available upon request.

For 165 of the 168 tested parameter sets, the observed number of ORFs<sub>0</sub> showing signatures of translation was significantly higher than expected under null model 1, hence rejecting null model 1 ( $P < 0.05$ ). The three parameter sets that did not pass this test were  $[P = 1, T = 4, W = 10]$ ,  $[P = 1, T = 5, W = 10]$  and  $[P = 1, T = 1, W = 300]$ . With every other parameter set, the presence of ribosomes on non-genic sequences appeared undoubtedly related to the presence of ORFs<sub>0</sub>. Null model 2 was rejected for 94 of the 168 tested parameter sets ( $P < 0.05$ ). In total, null model 1 and null model 2 were both rejected by 91 parameter sets.

For each of these 91 parameter sets, we estimated signal-to-noise ratio  $S = (O-E)/O$ , where  $O$  represents the number of ORFs<sub>0</sub> with translation signatures observed in the data and  $E$  represents the number of ORFs<sub>0</sub> with translation signatures expected under null model 2. The parameter set  $[P = 0.1, T = 5, W = 300]$  showed the best sensitivity ( $O = 3,069$ ) for a high signal-to-noise ratio ( $S = 71\% \pm 1\%$ , average and standard deviation; Supplementary Fig. 6).

However, the footprint reads were concentrated on a small fraction of the length of many of the ORFs<sub>0</sub> showing signatures of translation according to this set of parameters, for example on the start codon (Supplementary Fig. 6). While this signal appears highly specific based on signal-to-noise ratio, it could reflect a ribosomal activity other than full ORF translation. We therefore chose to impose a larger P parameter, reducing sensitivity but enriching for full ORF translation events. The set of parameters used in the analyses presented in the manuscript is [P = 0.5, T = 5, W = 300], detecting 1,139 ORFs<sub>0</sub> with signatures of translation (ORFs<sub>0</sub><sup>+</sup>) at a signal-to-noise ratio of 67% ± 2% (average and standard deviation) (Fig. 3b, Supplementary Fig. 6 and Supplementary Table 3). Most ORFs<sub>0</sub><sup>+</sup> correspond to independent translation events (Fig. 3a and b), although 11 appear located on the leader transcripts of ORFs<sub>1-10</sub> and 6 are organized in adjacent groups that might indicate polycistronic transcripts.

Empirical observations indicated that the parameters T and W are not relevant for annotated ORFs, where instances of stop codon read-through would result in many false negatives (Supplementary Fig. 6). With [P = 0.5] the only parameter to detect signatures of translation for ORFs<sub>1-10</sub>, we find 117 ORFs<sub>1-4</sub> and 4,545 ORFs<sub>5-10</sub> with signatures of translation (Supplementary Fig. 6).

The finding that ORFs<sub>0</sub> and ORFs<sub>1-4</sub> are translated in a condition-specific manner relative to ORFs<sub>5-10</sub> (Fig. 3d) was robust to parameter choice (Supplementary Fig. 6).

### ***Overlap with meiosis translation units***

A recent ribosome profiling study<sup>19</sup> identified transcripts containing start codons associated with ribosomes during meiosis (“meiosis translation units”) in the distant *S. cerevisiae* strain SK1. Of the 83,383 ORFs<sub>0</sub> for which we found a one-to-one orthologue in SK1, 1,353 were identified as meiosis translation units<sup>19</sup> and 795 as ORFs<sub>0</sub><sup>+</sup> (this study), with an overlap of 150 (Fisher’s exact test:  $P < 2.2 \times 10^{-16}$ , Odds Ratio = 15.7). This observation confirms the rejection of null model 2, both for this study and for the meiosis study<sup>19</sup>, unless the ribosome profiling assay produces systematic false positives that have not yet been identified.

### **Gene Ontology**

The Gene Ontology (GO) Directed Acyclic Graph (DAG), and also the associations between individual annotated ORFs and GO terms, were obtained directly from the GO Annotation database<sup>56</sup> at <http://www.geneontology.org/> in June 2011. These attributes were “up-propagated”, *i.e.* if an ORF was annotated as having a given attribute A, the ORF was also associated with all attributes implied by attribute A (namely its parents in the GO DAG). GO annotations were excluded from the analysis if they were inferred from non-traceable author statements, or if they were of unknown origin (‘NAS’ and ‘ND’ evidence codes respectively). Only 56 of the 777 ORFs<sub>1-4</sub> had available GO annotations in the biological process branch. Yet 13 of these were assigned the term “response to stress”, which represents a two-fold enrichment in relation to GO-annotated ORFs<sub>5-10</sub> ( $P < 0.05$ , one-sided Fisher’s exact test) (Supplementary Table 2).



### **Transcription factor binding sites**

Regulatory annotations<sup>57</sup> were downloaded from SGD in January 2012. We extracted the transcription factor binding sites and mapped the associated transcription factor gene names to our version of the SGD ORF<sub>1-10</sub> names.

### **Supplementary Methods 3: Statistical analyses**

All statistical tests were performed with R software<sup>58</sup>. Kendall's statistics were applied to quantify correlations presented in this manuscript. For correlations between conservation level and any variable reported in the main figures of the manuscript, we verified that the correlation is always significant i) when only ORFs<sub>5-10</sub> are taken into account and ii) when only 50 ORFs of each conservation level are sampled (100 bootstrap simulations per correlation statistics) (Supplementary Table 4).

To verify that the correlation between conservation level and strength of purifying selection was not entirely driven by RNA expression levels, we measured the corresponding partial correlations and showed that these were non-zero using a previously developed methodology<sup>59</sup> (expression level measured with RNAseq<sup>25</sup> in rich conditions, in terms of number of reads per nucleotide: Kendall's  $\tau = 0.3$ ,  $P = 1.8 \times 10^{-241}$ ; expression level measured with RNAseq<sup>17</sup>: Kendall's  $\tau = 0.3$ ,  $P = 6.86 \times 10^{-157}$ ; expression level measured by oligo-tiling array<sup>53</sup>: Kendall's  $\tau = 0.3$ ,  $P = 8.45 \times 10^{-230}$ ). The same methodology

was applied to verify that the correlation between conservation level and strength of purifying selection was not an artifact of limitations of the dN/dS method when applied to short sequences (Kendall's  $\tau = 0.2$ ,  $P = 2.04 \times 10^{-103}$ ). Finally, we verified that the correlation between conservation level and ORFs<sub>1-10</sub> length was not an artefact of applying the BLAST programs to shorter sequences, by reproducing a significant correlation when limiting our observations to ORFs<sub>1-10</sub> with BLAST hits covering at least 80% of their length (Kendall's  $\tau = 0.2$ ,  $P < 2.2 \times 10^{-16}$ ).

## Supplementary Tables

| TF symbol | TF name     | Number of candidate proto-genes among targets | Total number of targets | SGD description of the TF                                                                                                                                                                                                                                                                                  |
|-----------|-------------|-----------------------------------------------|-------------------------|------------------------------------------------------------------------------------------------------------------------------------------------------------------------------------------------------------------------------------------------------------------------------------------------------------|
| YHR206W   | <i>SKN7</i> | 8                                             | 16                      | Nuclear response regulator and transcription factor; physically interacts with the Tup1-Cyc8 complex and recruits Tup1p to its targets; part of a branched two-component signaling system; required for optimal induction of heat-shock genes in response to oxidative stress; involved in osmoregulation. |
| YER111C   | <i>SWI4</i> | 9                                             | 16                      | DNA binding component of the SBF complex (Swi4p-Swi6p), a transcriptional activator that in concert with MBF (Mbp1-Swi6p) regulates late G1-specific transcription of targets including cyclins and genes required for DNA synthesis and repair. SWItching deficient.                                      |
| YLR403W   | <i>SFP1</i> | 4                                             | 6                       | Transcription factor that controls expression of ribosome biogenesis genes in response to nutrients and stress, regulates G2/M transitions during mitotic cell cycle and DNA-damage response, modulates cell size; regulated by TORC1 and Mrs6p; can form the [ISP+] prion.                                |
| YMR016C   | <i>SOK2</i> | 10                                            | 15                      | Nuclear protein that plays a regulatory role in the cyclic AMP (cAMP)-dependent protein kinase (PKA) signal transduction pathway; negatively regulates pseudohyphal differentiation; homologous to several transcription factors.                                                                          |

**Supplementary Table 1. Transcription factors (TFs) predicted to preferentially regulate the expression of candidate proto-genes.** The predicted targets of TFs that are listed in this table are statistically enriched in candidate proto-genes (ORFs<sub>0</sub><sup>+</sup> and ORFs<sub>1-4</sub>) according to hypergeometric tests ( $P < 0.05$ ).

| ORF name  | Gene name    | Quality  | Age | Description                                                                                                                                                                                                                                | NULL mutant phenotypes (SGD curation)                                                                                                                                                                                                                                                                                                                                                                                                                                                                                                                                                                                                                                                                                                                                                                                                                                                                                                                                |
|-----------|--------------|----------|-----|--------------------------------------------------------------------------------------------------------------------------------------------------------------------------------------------------------------------------------------------|----------------------------------------------------------------------------------------------------------------------------------------------------------------------------------------------------------------------------------------------------------------------------------------------------------------------------------------------------------------------------------------------------------------------------------------------------------------------------------------------------------------------------------------------------------------------------------------------------------------------------------------------------------------------------------------------------------------------------------------------------------------------------------------------------------------------------------------------------------------------------------------------------------------------------------------------------------------------|
| YBR278W   | <i>DPB3</i>  | Verified | 4   | Third-largest subunit of DNA polymerase II (DNA polymerase epsilon), required to maintain fidelity of chromosomal replication and also for inheritance of telomeric silencing; mRNA abundance peaks at the G1/S boundary of the cell cycle | Chromosome/plasmid maintenance: abnormal; resistance to 4-aminofolic acid and sulfanilamide: decreased; silencing: decreased; cell size: increased; competitive fitness: decreased; dessication resistance: decreased; resistance to rapamycin: decreased; resistance to arsenite(3-): decreased; resistance to wortmannin: decreased; viable                                                                                                                                                                                                                                                                                                                                                                                                                                                                                                                                                                                                                        |
| YDR014W-A | <i>HED-1</i> | Verified | 4   | Meiosis-specific protein that down-regulates Rad51p-mediated mitotic recombination when the meiotic recombination machinery is impaired; early meiotic gene, transcribed specifically during meiotic prophase                              | N/A                                                                                                                                                                                                                                                                                                                                                                                                                                                                                                                                                                                                                                                                                                                                                                                                                                                                                                                                                                  |
| YER014C-A | <i>BUD25</i> | Verified | 4   | Protein involved in bud-site selection; diploid mutants display a random budding pattern instead of the wild-type bipolar pattern                                                                                                          | Acid pH resistance: decreased; alkaline pH resistance: decreased; budding pattern: abnormal; cell size: decreased; glycogen accumulation: decreased; competitive fitness: decreased; heat sensitivity: increased; lipid particle morphology: abnormal; metal resistance: decreased; resistance to cycloheximide: decreased; resistance to methyl methanesulfonate: decreased; resistance to CTBT: decreased; resistance to arsenite(3-): decreased; resistance to camptothecin: decreased; resistance to doxorubicin: decreased; resistance to L-1,4-dithiothreitol: decreased; resistance to acetic acid: decreased; resistance to wortmannin: decreased; resistance to sulfometuron methyl: decreased; resistance to rapamycin: decreased; resistance to caffeine: decreased; resistance to hydroxyurea: decreased; respiratory growth: absent; toxin resistance: decreased; transposable element transposition: decreased; utilization of nitrogen source: absent |
| YFR026C   | <i>ULI1</i>  | Verified | 3   | Involved in and induced by the endoplasmic reticulum unfolded protein response                                                                                                                                                             | Competitive fitness: decreased; sporulation: normal; viable                                                                                                                                                                                                                                                                                                                                                                                                                                                                                                                                                                                                                                                                                                                                                                                                                                                                                                          |
| YJL144W   | N/A          | Verified | 4   | Cytoplasmic hydrophilin with a role in dessication resistance; expression induced by osmotic stress, starvation and during stationary phase; GFP-fusion protein is induced by the DNA-damaging agent MMS                                   | Dessication resistance: decreased; competitive fitness: increased; dessication resistance: decreased; resistance to cycloheximide: decreased; resistance to amitrole: decreased; viable                                                                                                                                                                                                                                                                                                                                                                                                                                                                                                                                                                                                                                                                                                                                                                              |
| YLR265C   | <i>NEJ1</i>  | Verified | 4   | Protein involved in regulation of nonhomologous end joining; interacts with DNA ligase IV components Dnl4p and Lif1p; repressed by MAT heterozygosity; regulates cellular distribution of Lif1p                                            | Resistance to phleomycin: increased; competitive fitness: increased; resistance to acrolein: decreased; sporulation: normal; viable                                                                                                                                                                                                                                                                                                                                                                                                                                                                                                                                                                                                                                                                                                                                                                                                                                  |
| YML058W-A | <i>HUG1</i>  | Verified | 4   | Protein involved in the Mec1p-mediated checkpoint pathway that responds to DNA damage or replication arrest, transcription is induced by DNA damage                                                                                        | Heat sensitivity: decreased; pseudohyphal growth: decreased; resistance to hydroxyurea: decreased                                                                                                                                                                                                                                                                                                                                                                                                                                                                                                                                                                                                                                                                                                                                                                                                                                                                    |

|           |              |          |   |                                                                                                                                                                                                                                                           |                                                                                                                                                                                                                                                    |
|-----------|--------------|----------|---|-----------------------------------------------------------------------------------------------------------------------------------------------------------------------------------------------------------------------------------------------------------|----------------------------------------------------------------------------------------------------------------------------------------------------------------------------------------------------------------------------------------------------|
| YMR159C   | <i>ATG16</i> | Verified | 4 | Conserved protein that interacts with Atg12p-Atg5p conjugates to form Atg12p-Atg5p-Atg16p multimers, which localize to the pre-autophagosomal structure and are required for autophagy                                                                    | Autophagy: absent; metal resistance: increased; mitophagy: decreased; GFP-Osh1p accumulation: increased; Atg8p distribution: abnormal; Atg5p distribution: abnormal; Lap4p (API) modification: absent; sporulation: absent; viability: decreased   |
| YMR175W   | <i>SIP18</i> | Verified | 4 | Phospholipid-binding hydrophilin with a role in desiccation resistance; expression is induced by osmotic stress                                                                                                                                           | Desiccation resistance: decreased; toxin resistance: decreased; competitive fitness: increased; toxin resistance: decreased; viable                                                                                                                |
| YMR251W-A | <i>HOR7</i>  | Verified | 4 | Protein of unknown function; overexpression suppresses Ca <sup>2+</sup> sensitivity of mutants lacking inositol phosphorylceramide mannosyltransferases Csg1p and Csh1p; transcription is induced under hyperosmotic stress and repressed by alpha factor | Competitive fitness: decreased; viable                                                                                                                                                                                                             |
| YNR074C   | <i>AIF1</i>  | Verified | 4 | Mitochondrial cell death effector that translocates to the nucleus in response to apoptotic stimuli, homolog of mammalian Apoptosis-Inducing Factor, putative reductase                                                                                   | Apoptosis: absent; apoptosis: decreased; reactive oxygen species accumulation: decreased; metal resistance: decreased; oxidative stress resistance: increased; resistance to dihydromotuporamine C: decreased; toxin resistance: increased; viable |
| YOL052C-A | <i>DDR2</i>  | Verified | 4 | Multistress response protein, expression is activated by a variety of xenobiotic agents and environmental or physiological stresses                                                                                                                       | Survival rate in stationary phase: decreased;; polyphosphate accumulation: abnormal; competitive fitness: increased; mitotic recombination: increased; Rad52-YFP distribution: increased                                                           |
| YPL223C   | <i>GRE1</i>  | Verified | 4 | Hydrophilin of unknown function; stress induced (osmotic, ionic, oxidative, heat shock and heavy metals); regulated by the HOG pathway                                                                                                                    | Competitive fitness: increased                                                                                                                                                                                                                     |

**Supplementary Table 2. Description of 13 ORFs<sub>1-4</sub> annotated with the Gene Ontology term “response to stress”. Source: SGD<sup>17</sup>.**

| ORF name  | Conservation level | Retained by natural selection | Length greater or equal to 300 nucleotides | With translation signatures | Chromosome | Coor1  | Coor2  | Strand |
|-----------|--------------------|-------------------------------|--------------------------------------------|-----------------------------|------------|--------|--------|--------|
| YAL068W-A | 4                  | 0                             | 0                                          | 0                           | 1          | 538    | 792    | +      |
| smorf38   | 0                  | 0                             | 0                                          | 1                           | 1          | 9547   | 9618   | +      |
| YAL064W   | 2                  | 0                             | 1                                          | 0                           | 1          | 21526  | 21852  | +      |
| YAL031W-A | 1                  | 0                             | 1                                          | 0                           | 1          | 84670  | 84978  | +      |
| smorf708  | 0                  | 0                             | 0                                          | 1                           | 1          | 198892 | 198963 | +      |
| YAR064W   | 3                  | 0                             | 1                                          | 0                           | 1          | 220189 | 220488 | +      |
| YAL069W   | 1                  | 0                             | 1                                          | 0                           | 1          | 335    | 649    | +      |
| YAL067W-A | 4                  | 1                             | 0                                          | 0                           | 1          | 2480   | 2707   | +      |
| smorf1076 | 0                  | 0                             | 0                                          | 1                           | 1          | 73913  | 73954  | +      |
| YAL019W-A | 4                  | 0                             | 1                                          | 0                           | 1          | 114251 | 114820 | +      |
| smorf1290 | 0                  | 0                             | 0                                          | 1                           | 1          | 138614 | 138652 | +      |
| YAR053W   | 1                  | 0                             | 0                                          | 0                           | 1          | 208358 | 208654 | +      |
| YAL066W   | 1                  | 0                             | 1                                          | 0                           | 1          | 10092  | 10400  | +      |
| smorf1697 | 0                  | 0                             | 0                                          | 1                           | 1          | 11403  | 11441  | +      |
| YAL047W-A | 3                  | 1                             | 1                                          | 0                           | 1          | 54585  | 54914  | +      |
| YAR019W-A | 3                  | 0                             | 1                                          | 0                           | 1          | 174996 | 175340 | +      |
| smorf2407 | 0                  | 0                             | 0                                          | 1                           | 1          | 196554 | 196589 | +      |
| smorf2421 | 0                  | 0                             | 0                                          | 1                           | 1          | 200664 | 200696 | +      |
| YAR066W   | 4                  | 0                             | 1                                          | 0                           | 1          | 221040 | 221651 | +      |
| smorf2495 | 0                  | 0                             | 0                                          | 1                           | 1          | 225063 | 225110 | +      |
| YAR070C   | 4                  | 0                             | 1                                          | 0                           | 1          | 224554 | 224853 | -      |
| YAR069C   | 4                  | 0                             | 0                                          | 0                           | 1          | 224002 | 224295 | -      |
| YAR047C   | 2                  | 0                             | 1                                          | 0                           | 1          | 201460 | 201780 | -      |
| YAR035C-A | 1                  | 0                             | 0                                          | 0                           | 1          | 192331 | 192411 | -      |
| smorf2748 | 0                  | 0                             | 0                                          | 1                           | 1          | 176551 | 176592 | -      |
| YAL016C-A | 4                  | 0                             | 1                                          | 0                           | 1          | 124756 | 125070 | -      |
| smorf3203 | 0                  | 0                             | 0                                          | 1                           | 1          | 42817  | 42882  | -      |
| smorf3239 | 0                  | 0                             | 0                                          | 1                           | 1          | 34159  | 34194  | -      |
| smorf3472 | 0                  | 0                             | 0                                          | 1                           | 1          | 199878 | 199934 | -      |
| YAL016C-B | 2                  | 0                             | 0                                          | 0                           | 1          | 124308 | 124493 | -      |
| smorf3869 | 0                  | 0                             | 0                                          | 1                           | 1          | 82431  | 82502  | -      |
| YAL056C-A | 1                  | 0                             | 1                                          | 0                           | 1          | 38697  | 39047  | -      |
| YAR060C   | 3                  | 0                             | 1                                          | 0                           | 1          | 217148 | 217483 | -      |
| YAR030C   | 1                  | 0                             | 1                                          | 0                           | 1          | 186506 | 186847 | -      |
| YAL026C-A | 4                  | 0                             | 1                                          | 0                           | 1          | 95387  | 95824  | -      |
| YAL034C-B | 4                  | 0                             | 1                                          | 0                           | 1          | 79490  | 79843  | -      |
| YAL037C-A | 1                  | 0                             | 0                                          | 0                           | 1          | 73427  | 73519  | -      |
| YAL042C-A | 2                  | 0                             | 1                                          | 0                           | 1          | 61232  | 61609  | -      |
| smorf4839 | 0                  | 0                             | 0                                          | 1                           | 1          | 33458  | 33499  | -      |
| smorf4840 | 0                  | 0                             | 0                                          | 1                           | 1          | 33380  | 33433  | -      |
| smorf4885 | 0                  | 0                             | 0                                          | 1                           | 1          | 23213  | 23260  | -      |
| YAL063C-A | 2                  | 0                             | 0                                          | 0                           | 1          | 22397  | 22687  | -      |
| smorf5363 | 0                  | 0                             | 0                                          | 1                           | 2          | 115822 | 115863 | +      |
| YBL053W   | 1                  | 0                             | 1                                          | 0                           | 2          | 119338 | 119712 | +      |
| smorf5778 | 0                  | 0                             | 0                                          | 1                           | 2          | 238570 | 238623 | +      |
| smorf5835 | 0                  | 0                             | 0                                          | 1                           | 2          | 252217 | 252258 | +      |
| YBR032W   | 3                  | 1                             | 1                                          | 0                           | 2          | 301519 | 301821 | +      |
| smorf6145 | 0                  | 0                             | 0                                          | 1                           | 2          | 336517 | 336558 | +      |
| YBR056W-A | 4                  | 1                             | 0                                          | 1                           | 2          | 351253 | 351453 | +      |
| smorf6264 | 0                  | 0                             | 0                                          | 1                           | 2          | 366817 | 366918 | +      |
| smorf6276 | 0                  | 0                             | 0                                          | 1                           | 2          | 370627 | 370686 | +      |
| smorf6277 | 0                  | 0                             | 0                                          | 1                           | 2          | 370690 | 370782 | +      |
| smorf6281 | 0                  | 0                             | 0                                          | 1                           | 2          | 372058 | 372105 | +      |
| smorf6442 | 0                  | 0                             | 0                                          | 1                           | 2          | 418516 | 418551 | +      |
| YBR178W   | 4                  | 0                             | 1                                          | 0                           | 2          | 586066 | 586440 | +      |
| YBR184W   | 4                  | 0                             | 1                                          | 0                           | 2          | 597358 | 598929 | +      |
| YBR191W-A | 4                  | 0                             | 0                                          | 1                           | 2          | 607144 | 607218 | +      |
| YBR200W-A | 1                  | 0                             | 0                                          | 0                           | 2          | 622978 | 623142 | +      |
| YBR224W   | 4                  | 0                             | 1                                          | 0                           | 2          | 670120 | 670635 | +      |
| smorf7747 | 0                  | 0                             | 0                                          | 1                           | 2          | 786676 | 786708 | +      |
| YBL108W   | 4                  | 0                             | 1                                          | 0                           | 2          | 8177   | 8482   | +      |
| YBL100W-C | 3                  | 0                             | 0                                          | 1                           | 2          | 28427  | 28546  | +      |
| smorf8088 | 0                  | 0                             | 0                                          | 1                           | 2          | 60644  | 60679  | +      |
| YBL073W   | 3                  | 0                             | 1                                          | 0                           | 2          | 87644  | 87955  | +      |
| YBL065W   | 4                  | 0                             | 1                                          | 0                           | 2          | 99965  | 100309 | +      |
| YBL044W   | 4                  | 0                             | 1                                          | 0                           | 2          | 136001 | 136369 | +      |
| smorf8481 | 0                  | 0                             | 0                                          | 1                           | 2          | 164531 | 164677 | +      |
| smorf8862 | 0                  | 0                             | 0                                          | 1                           | 2          | 276839 | 276931 | +      |
| smorf8907 | 0                  | 0                             | 0                                          | 1                           | 2          | 291131 | 291169 | +      |
| smorf9121 | 0                  | 0                             | 0                                          | 1                           | 2          | 350186 | 350275 | +      |

|            |   |   |   |   |   |        |        |   |
|------------|---|---|---|---|---|--------|--------|---|
| smorf9142  | 0 | 0 | 0 | 1 | 2 | 353519 | 353587 | + |
| smorf9187  | 0 | 0 | 0 | 1 | 2 | 364409 | 364468 | + |
| smorf9210  | 0 | 0 | 0 | 1 | 2 | 370010 | 370045 | + |
| YBR113W    | 4 | 0 | 1 | 0 | 2 | 465560 | 466042 | + |
| smorf9630  | 0 | 0 | 0 | 1 | 2 | 474254 | 474355 | + |
| YBR126W-A  | 3 | 0 | 0 | 1 | 2 | 490844 | 491050 | + |
| smorf9824  | 0 | 0 | 0 | 1 | 2 | 527666 | 527719 | + |
| smorf9833  | 0 | 0 | 0 | 1 | 2 | 532499 | 532531 | + |
| YBR209W    | 4 | 0 | 1 | 0 | 2 | 642578 | 642895 | + |
| YBR221W-A  | 4 | 0 | 0 | 0 | 2 | 666533 | 666637 | + |
| smorf10453 | 0 | 0 | 0 | 1 | 2 | 716846 | 716890 | + |
| smorf10670 | 0 | 0 | 0 | 1 | 2 | 773675 | 773731 | + |
| YBR285W    | 4 | 0 | 1 | 1 | 2 | 773918 | 774352 | + |
| YBL077W    | 3 | 0 | 1 | 0 | 2 | 80895  | 81326  | + |
| YBL048W    | 4 | 0 | 1 | 0 | 2 | 127302 | 127613 | + |
| smorf11354 | 0 | 0 | 0 | 1 | 2 | 151725 | 151769 | + |
| YBL008W-A  | 4 | 0 | 0 | 0 | 2 | 209412 | 209651 | + |
| smorf11717 | 0 | 0 | 0 | 1 | 2 | 251808 | 251879 | + |
| smorf11880 | 0 | 0 | 0 | 1 | 2 | 292071 | 292172 | + |
| YBR051W    | 2 | 0 | 1 | 0 | 2 | 337986 | 338336 | + |
| smorf12139 | 0 | 0 | 0 | 1 | 2 | 362898 | 362939 | + |
| smorf12183 | 0 | 0 | 0 | 1 | 2 | 373212 | 373244 | + |
| YBR124W    | 2 | 0 | 1 | 0 | 2 | 486501 | 486860 | + |
| YBR134W    | 3 | 0 | 1 | 0 | 2 | 504237 | 504638 | + |
| YBR148W    | 4 | 1 | 1 | 0 | 2 | 537870 | 539699 | + |
| smorf12902 | 0 | 0 | 0 | 1 | 2 | 582015 | 582071 | + |
| YBR190W    | 4 | 0 | 1 | 0 | 2 | 605961 | 606272 | + |
| YBR206W    | 2 | 0 | 1 | 1 | 2 | 634596 | 634919 | + |
| smorf13232 | 0 | 0 | 0 | 1 | 2 | 675006 | 675065 | + |
| smorf13648 | 0 | 0 | 0 | 1 | 2 | 785439 | 785498 | + |
| smorf13665 | 0 | 0 | 0 | 1 | 2 | 788439 | 788540 | + |
| smorf13805 | 0 | 0 | 0 | 1 | 2 | 804794 | 804907 | - |
| YBR296C-A  | 1 | 0 | 0 | 0 | 2 | 800117 | 800236 | - |
| YBR277C    | 2 | 1 | 1 | 0 | 2 | 760211 | 760612 | - |
| smorf14074 | 0 | 0 | 0 | 1 | 2 | 722423 | 722497 | - |
| smorf14319 | 0 | 0 | 0 | 1 | 2 | 644897 | 644944 | - |
| smorf14445 | 0 | 0 | 0 | 1 | 2 | 607202 | 607246 | - |
| smorf14488 | 0 | 0 | 0 | 1 | 2 | 597044 | 597085 | - |
| smorf15107 | 0 | 1 | 0 | 1 | 2 | 431240 | 431278 | - |
| smorf15282 | 0 | 0 | 0 | 1 | 2 | 386027 | 386071 | - |
| YBR063C    | 4 | 0 | 1 | 0 | 2 | 366968 | 368182 | - |
| smorf15429 | 0 | 0 | 0 | 1 | 2 | 349694 | 349729 | - |
| YBR050C    | 4 | 0 | 1 | 0 | 2 | 337181 | 338197 | - |
| smorf15591 | 0 | 0 | 0 | 1 | 2 | 303728 | 303772 | - |
| YBR013C    | 4 | 0 | 1 | 1 | 2 | 265490 | 265879 | - |
| smorf15763 | 0 | 0 | 0 | 1 | 2 | 251564 | 251623 | - |
| smorf16023 | 0 | 0 | 0 | 1 | 2 | 169637 | 169873 | - |
| YBL071C    | 2 | 0 | 1 | 0 | 2 | 90221  | 90529  | - |
| YBL071C-B  | 3 | 0 | 0 | 0 | 2 | 89456  | 89554  | - |
| YBL100C    | 1 | 0 | 1 | 0 | 2 | 36986  | 37300  | - |
| YBR300C    | 3 | 0 | 1 | 0 | 2 | 808594 | 809091 | - |
| YBR232C    | 1 | 1 | 1 | 0 | 2 | 683368 | 683727 | - |
| YBR226C    | 2 | 0 | 1 | 0 | 2 | 673150 | 673560 | - |
| smorf17112 | 0 | 0 | 0 | 1 | 2 | 650119 | 650172 | - |
| YBR196C-B  | 1 | 0 | 0 | 0 | 2 | 614521 | 614625 | - |
| smorf17456 | 0 | 0 | 0 | 1 | 2 | 558337 | 558438 | - |
| smorf17494 | 0 | 1 | 0 | 1 | 2 | 546031 | 546213 | - |
| smorf17506 | 0 | 0 | 0 | 1 | 2 | 540529 | 540588 | - |
| smorf17535 | 0 | 0 | 0 | 1 | 2 | 532924 | 532968 | - |
| smorf17702 | 0 | 0 | 0 | 1 | 2 | 479665 | 479715 | - |
| YBR116C    | 1 | 0 | 1 | 0 | 2 | 474193 | 474720 | - |
| YBR107C    | 4 | 0 | 1 | 0 | 2 | 453787 | 454524 | - |
| smorf17832 | 0 | 0 | 0 | 1 | 2 | 452404 | 452448 | - |
| YBR103C-A  | 4 | 1 | 0 | 0 | 2 | 449314 | 449457 | - |
| smorf17931 | 0 | 0 | 0 | 1 | 2 | 417955 | 417999 | - |
| YBR076C-A  | 1 | 0 | 0 | 1 | 2 | 391345 | 391611 | - |
| YBR072C-A  | 1 | 0 | 0 | 0 | 2 | 382855 | 383016 | - |
| smorf18388 | 0 | 0 | 0 | 1 | 2 | 283429 | 283491 | - |
| smorf18409 | 0 | 0 | 0 | 1 | 2 | 275542 | 275589 | - |
| smorf18840 | 0 | 0 | 0 | 1 | 2 | 171097 | 171144 | - |
| smorf18874 | 0 | 0 | 0 | 1 | 2 | 161428 | 161469 | - |
| smorf19172 | 0 | 0 | 0 | 1 | 2 | 92077  | 92145  | - |
| smorf19187 | 0 | 0 | 0 | 1 | 2 | 88348  | 88515  | - |

|            |   |   |   |   |   |        |        |   |
|------------|---|---|---|---|---|--------|--------|---|
| smorf19266 | 0 | 0 | 0 | 1 | 2 | 75088  | 75132  | - |
| YBL096C    | 2 | 0 | 1 | 0 | 2 | 43171  | 43479  | - |
| YBR298C-A  | 2 | 0 | 0 | 0 | 2 | 805029 | 805250 | - |
| smorf19629 | 0 | 0 | 0 | 1 | 2 | 786627 | 786713 | - |
| YBR292C    | 2 | 0 | 1 | 0 | 2 | 784698 | 785069 | - |
| smorf19997 | 0 | 0 | 0 | 1 | 2 | 700161 | 700202 | - |
| smorf20256 | 0 | 1 | 0 | 1 | 2 | 629613 | 629699 | - |
| YBR201C-A  | 4 | 0 | 0 | 1 | 2 | 624489 | 624692 | - |
| YBR196C-A  | 3 | 0 | 0 | 0 | 2 | 614019 | 614168 | - |
| YBR182C-A  | 1 | 0 | 0 | 0 | 2 | 595356 | 595550 | - |
| YBR174C    | 1 | 0 | 1 | 0 | 2 | 582333 | 582647 | - |
| smorf20500 | 0 | 0 | 0 | 1 | 2 | 556470 | 556511 | - |
| YBR144C    | 3 | 0 | 1 | 0 | 2 | 533229 | 533543 | - |
| smorf20911 | 0 | 0 | 0 | 1 | 2 | 417123 | 417161 | - |
| smorf21307 | 0 | 0 | 0 | 1 | 2 | 307626 | 307688 | - |
| YBR027C    | 4 | 0 | 1 | 0 | 2 | 294024 | 294356 | - |
| YBL012C    | 2 | 0 | 1 | 0 | 2 | 203409 | 203810 | - |
| smorf21894 | 0 | 0 | 0 | 1 | 2 | 166851 | 166904 | - |
| smorf21949 | 0 | 0 | 0 | 1 | 2 | 146271 | 146306 | - |
| YBL070C    | 4 | 0 | 1 | 0 | 2 | 90603  | 90923  | - |
| smorf22501 | 0 | 0 | 0 | 1 | 3 | 8554   | 8604   | + |
| smorf22585 | 0 | 0 | 0 | 1 | 3 | 30910  | 30996  | + |
| smorf22633 | 0 | 0 | 0 | 1 | 3 | 40969  | 41055  | + |
| YCL042W    | 3 | 0 | 1 | 1 | 3 | 50584  | 50943  | + |
| smorf22736 | 0 | 0 | 0 | 1 | 3 | 69034  | 69078  | + |
| YCL021W-A  | 4 | 0 | 1 | 0 | 3 | 83620  | 83997  | + |
| smorf22795 | 0 | 0 | 0 | 1 | 3 | 92710  | 92769  | + |
| smorf22866 | 0 | 0 | 0 | 1 | 3 | 114388 | 114441 | + |
| smorf22873 | 0 | 0 | 0 | 1 | 3 | 116383 | 116427 | + |
| smorf22887 | 0 | 0 | 0 | 1 | 3 | 120841 | 120873 | + |
| smorf22980 | 0 | 0 | 0 | 1 | 3 | 152035 | 152121 | + |
| smorf23005 | 0 | 0 | 0 | 1 | 3 | 156436 | 156492 | + |
| smorf23027 | 0 | 0 | 0 | 1 | 3 | 160732 | 160773 | + |
| smorf23173 | 0 | 0 | 0 | 1 | 3 | 205903 | 205944 | + |
| smorf23188 | 0 | 0 | 0 | 1 | 3 | 209707 | 209832 | + |
| smorf23284 | 0 | 0 | 0 | 1 | 3 | 242629 | 242685 | + |
| smorf23372 | 0 | 0 | 0 | 1 | 3 | 273913 | 273963 | + |
| YCR095W-A  | 1 | 0 | 0 | 0 | 3 | 289636 | 289794 | + |
| YCR097W-A  | 4 | 0 | 0 | 0 | 3 | 294436 | 294702 | + |
| smorf23466 | 0 | 0 | 0 | 1 | 3 | 303259 | 303339 | + |
| YCL065W    | 4 | 0 | 1 | 0 | 3 | 13751  | 14119  | + |
| smorf23637 | 0 | 0 | 0 | 1 | 3 | 39662  | 39805  | + |
| YCL046W    | 1 | 1 | 1 | 0 | 3 | 46640  | 46963  | + |
| smorf23901 | 0 | 0 | 0 | 1 | 3 | 114878 | 114916 | + |
| smorf23995 | 0 | 0 | 0 | 1 | 3 | 142619 | 142687 | + |
| YCR085W    | 3 | 0 | 1 | 0 | 3 | 262913 | 263266 | + |
| smorf24539 | 0 | 0 | 0 | 1 | 3 | 289496 | 289588 | + |
| YCL076W    | 4 | 0 | 1 | 0 | 3 | 1392   | 2135   | + |
| smorf24784 | 0 | 0 | 0 | 1 | 3 | 44526  | 44585  | + |
| smorf25041 | 0 | 0 | 0 | 1 | 3 | 111546 | 111587 | + |
| YCR001W    | 2 | 0 | 1 | 0 | 3 | 115683 | 115997 | + |
| smorf25077 | 0 | 0 | 0 | 1 | 3 | 120519 | 120560 | + |
| smorf25256 | 0 | 0 | 0 | 1 | 3 | 169158 | 169193 | + |
| smorf25259 | 0 | 0 | 0 | 1 | 3 | 169500 | 169553 | + |
| YCR041W    | 4 | 0 | 1 | 0 | 3 | 200907 | 201239 | + |
| smorf25550 | 0 | 0 | 0 | 1 | 3 | 243246 | 243287 | + |
| smorf25734 | 0 | 0 | 0 | 1 | 3 | 300054 | 300113 | + |
| YCR108C    | 1 | 0 | 0 | 0 | 3 | 315994 | 316185 | - |
| YCR064C    | 3 | 0 | 1 | 0 | 3 | 228091 | 228501 | - |
| YCR049C    | 2 | 0 | 1 | 0 | 3 | 211867 | 212313 | - |
| smorf26395 | 0 | 0 | 0 | 1 | 3 | 170305 | 170367 | - |
| YCR024C-B  | 4 | 0 | 0 | 1 | 3 | 162595 | 162861 | - |
| YCR022C    | 4 | 0 | 1 | 0 | 3 | 157417 | 157761 | - |
| smorf26463 | 0 | 0 | 0 | 1 | 3 | 152509 | 152571 | - |
| YCR013C    | 2 | 0 | 1 | 0 | 3 | 138400 | 139047 | - |
| smorf26594 | 0 | 0 | 0 | 1 | 3 | 116605 | 116649 | - |
| YCL023C    | 3 | 0 | 1 | 0 | 3 | 78949  | 79296  | - |
| smorf26892 | 0 | 0 | 0 | 1 | 3 | 28330  | 28392  | - |
| smorf26954 | 0 | 0 | 0 | 1 | 3 | 8347   | 8382   | - |
| smorf27026 | 0 | 0 | 0 | 1 | 3 | 309747 | 309884 | - |
| smorf27536 | 0 | 0 | 0 | 1 | 3 | 185904 | 185990 | - |
| smorf27568 | 0 | 0 | 0 | 1 | 3 | 176808 | 176852 | - |
| smorf27667 | 0 | 0 | 0 | 1 | 3 | 152001 | 152048 | - |



|            |   |   |   |   |   |         |         |   |
|------------|---|---|---|---|---|---------|---------|---|
| smorf27744 | 0 | 0 | 0 | 1 | 3 | 124428  | 124466  | - |
| YCL007C    | 2 | 0 | 1 | 0 | 3 | 106974  | 107366  | - |
| smorf27904 | 0 | 0 | 0 | 1 | 3 | 82554   | 82592   | - |
| YCL041C    | 3 | 0 | 1 | 1 | 3 | 50133   | 50627   | - |
| smorf28057 | 0 | 0 | 0 | 1 | 3 | 39414   | 39455   | - |
| YCL056C    | 4 | 0 | 1 | 1 | 3 | 26925   | 27359   | - |
| YCL058C    | 2 | 0 | 1 | 0 | 3 | 23523   | 23981   | - |
| smorf28492 | 0 | 0 | 0 | 1 | 3 | 225968  | 226003  | - |
| YCR025C    | 4 | 0 | 1 | 0 | 3 | 163442  | 163852  | - |
| smorf28850 | 0 | 0 | 0 | 1 | 3 | 124859  | 124933  | - |
| YCR006C    | 4 | 0 | 1 | 0 | 3 | 122528  | 123001  | - |
| smorf29045 | 0 | 0 | 0 | 1 | 3 | 75437   | 75478   | - |
| YDL241W    | 4 | 0 | 1 | 1 | 4 | 20635   | 21006   | + |
| smorf29417 | 0 | 0 | 0 | 1 | 4 | 21424   | 21462   | + |
| smorf29472 | 0 | 0 | 0 | 1 | 4 | 35566   | 35622   | + |
| YDL186W    | 4 | 0 | 1 | 0 | 4 | 125617  | 126450  | + |
| YDL159W-A  | 4 | 0 | 0 | 0 | 4 | 172183  | 172314  | + |
| smorf30148 | 0 | 0 | 0 | 1 | 4 | 221101  | 221145  | + |
| YDL114W-A  | 4 | 0 | 0 | 0 | 4 | 254935  | 255048  | + |
| smorf30472 | 0 | 0 | 0 | 1 | 4 | 320443  | 320475  | + |
| smorf30675 | 0 | 0 | 0 | 1 | 4 | 378757  | 378804  | + |
| smorf30681 | 0 | 0 | 0 | 1 | 4 | 381796  | 381849  | + |
| YDL034W    | 1 | 0 | 1 | 0 | 4 | 391780  | 392124  | + |
| YDL026W    | 2 | 0 | 1 | 0 | 4 | 404746  | 405057  | + |
| smorf30749 | 0 | 0 | 0 | 1 | 4 | 405241  | 405288  | + |
| YDR024W    | 3 | 0 | 1 | 0 | 4 | 491014  | 491499  | + |
| YDR029W    | 4 | 0 | 1 | 0 | 4 | 501097  | 501411  | + |
| YDR034W-B  | 4 | 0 | 0 | 1 | 4 | 521311  | 521466  | + |
| smorf31254 | 0 | 0 | 0 | 1 | 4 | 551023  | 551109  | + |
| smorf31285 | 0 | 0 | 0 | 1 | 4 | 561031  | 561066  | + |
| smorf31385 | 0 | 0 | 0 | 1 | 4 | 588046  | 588099  | + |
| smorf31518 | 0 | 0 | 0 | 1 | 4 | 626305  | 626388  | + |
| smorf32317 | 0 | 0 | 0 | 1 | 4 | 832612  | 832647  | + |
| YDR194W-A  | 2 | 0 | 0 | 0 | 4 | 848068  | 848220  | + |
| smorf32567 | 0 | 0 | 0 | 1 | 4 | 899257  | 899310  | + |
| YDR246W-A  | 3 | 0 | 0 | 0 | 4 | 955129  | 955329  | + |
| smorf32877 | 0 | 0 | 0 | 1 | 4 | 979834  | 979866  | + |
| YDR290W    | 4 | 0 | 1 | 0 | 4 | 1039366 | 1039695 | + |
| smorf33192 | 0 | 0 | 0 | 1 | 4 | 1052503 | 1052541 | + |
| smorf33239 | 0 | 0 | 0 | 1 | 4 | 1072279 | 1072320 | + |
| smorf33849 | 0 | 0 | 0 | 1 | 4 | 1242739 | 1242771 | + |
| YDR406W-A  | 2 | 0 | 0 | 0 | 4 | 1283791 | 1284036 | + |
| smorf34291 | 0 | 0 | 0 | 1 | 4 | 1366099 | 1366140 | + |
| smorf34604 | 0 | 0 | 0 | 1 | 4 | 1454983 | 1455027 | + |
| YDR525W    | 4 | 0 | 1 | 0 | 4 | 1489897 | 1490226 | + |
| smorf34763 | 0 | 0 | 0 | 1 | 4 | 1501045 | 1501080 | + |
| smorf34796 | 0 | 0 | 0 | 1 | 4 | 1510018 | 1510050 | + |
| YDL242W    | 4 | 0 | 1 | 0 | 4 | 18959   | 19312   | + |
| smorf34989 | 0 | 0 | 0 | 1 | 4 | 26360   | 26422   | + |
| smorf35065 | 0 | 0 | 0 | 1 | 4 | 50582   | 50617   | + |
| YDL221W    | 4 | 0 | 1 | 0 | 4 | 62012   | 62563   | + |
| smorf36039 | 0 | 1 | 0 | 1 | 4 | 316643  | 316699  | + |
| smorf36061 | 0 | 0 | 0 | 1 | 4 | 323936  | 324040  | + |
| YDL062W    | 1 | 0 | 1 | 0 | 4 | 339857  | 340282  | + |
| smorf36384 | 0 | 0 | 0 | 1 | 4 | 417272  | 417304  | + |
| YDR014W-A  | 4 | 0 | 1 | 0 | 4 | 477794  | 478282  | + |
| smorf36872 | 0 | 0 | 0 | 1 | 4 | 542549  | 542803  | + |
| smorf37192 | 0 | 0 | 0 | 1 | 4 | 617966  | 618121  | + |
| smorf37216 | 0 | 0 | 0 | 1 | 4 | 628637  | 628696  | + |
| YDR112W    | 2 | 1 | 1 | 0 | 4 | 679541  | 679849  | + |
| smorf37503 | 0 | 0 | 0 | 1 | 4 | 699920  | 700096  | + |
| smorf37593 | 0 | 0 | 0 | 1 | 4 | 720620  | 720661  | + |
| smorf37601 | 0 | 0 | 0 | 1 | 4 | 722384  | 722455  | + |
| smorf37678 | 0 | 0 | 0 | 1 | 4 | 743513  | 743590  | + |
| YDR157W    | 4 | 0 | 1 | 0 | 4 | 769928  | 770329  | + |
| YDR230W    | 1 | 0 | 1 | 0 | 4 | 926219  | 926566  | + |
| smorf38356 | 0 | 0 | 0 | 1 | 4 | 968162  | 968200  | + |
| smorf38518 | 0 | 0 | 0 | 1 | 4 | 1015976 | 1016020 | + |
| smorf38566 | 0 | 0 | 0 | 1 | 4 | 1030514 | 1030597 | + |
| smorf38569 | 0 | 0 | 0 | 1 | 4 | 1031219 | 1031251 | + |
| smorf38808 | 0 | 0 | 0 | 1 | 4 | 1090094 | 1090150 | + |
| YDR320W-B  | 4 | 0 | 0 | 0 | 4 | 1108481 | 1108618 | + |
| smorf39073 | 0 | 0 | 0 | 1 | 4 | 1154054 | 1154182 | + |

|            |   |   |   |   |   |         |         |   |
|------------|---|---|---|---|---|---------|---------|---|
| smorf39232 | 0 | 0 | 0 | 1 | 4 | 1195913 | 1195957 | + |
| YDR396W    | 3 | 0 | 1 | 0 | 4 | 1266287 | 1266787 | + |
| smorf39498 | 0 | 0 | 0 | 1 | 4 | 1288124 | 1288183 | + |
| smorf39847 | 0 | 0 | 0 | 1 | 4 | 1406126 | 1406221 | + |
| YDR521W    | 1 | 0 | 1 | 0 | 4 | 1483133 | 1483468 | + |
| smorf40276 | 0 | 0 | 0 | 1 | 4 | 1516604 | 1516672 | + |
| smorf40298 | 0 | 0 | 0 | 1 | 4 | 1521236 | 1521295 | + |
| YDL247W-A  | 4 | 0 | 0 | 0 | 4 | 3762    | 3836    | + |
| smorf40392 | 0 | 0 | 0 | 1 | 4 | 19428   | 19475   | + |
| smorf40397 | 0 | 0 | 0 | 1 | 4 | 21450   | 21545   | + |
| smorf40511 | 0 | 0 | 0 | 1 | 4 | 49998   | 50054   | + |
| smorf40513 | 0 | 0 | 0 | 1 | 4 | 50346   | 50498   | + |
| smorf40531 | 0 | 0 | 0 | 1 | 4 | 59463   | 59522   | + |
| smorf40605 | 0 | 0 | 0 | 1 | 4 | 81486   | 81524   | + |
| smorf40642 | 0 | 0 | 0 | 1 | 4 | 94134   | 94286   | + |
| YDL152W    | 3 | 0 | 1 | 0 | 4 | 182823  | 183188  | + |
| smorf41057 | 0 | 0 | 0 | 1 | 4 | 219600  | 219641  | + |
| YDL118W    | 2 | 0 | 1 | 0 | 4 | 247302  | 247682  | + |
| smorf41595 | 0 | 0 | 0 | 1 | 4 | 359784  | 359828  | + |
| smorf41608 | 0 | 0 | 0 | 1 | 4 | 361959  | 361994  | + |
| YDL032W    | 2 | 0 | 1 | 0 | 4 | 393687  | 393998  | + |
| smorf41832 | 0 | 0 | 0 | 1 | 4 | 408153  | 408197  | + |
| YDR003W-A  | 2 | 0 | 0 | 1 | 4 | 454779  | 454901  | + |
| smorf42031 | 0 | 0 | 0 | 1 | 4 | 471072  | 471173  | + |
| smorf42189 | 0 | 0 | 0 | 1 | 4 | 512568  | 512600  | + |
| smorf42335 | 0 | 0 | 0 | 1 | 4 | 545511  | 545549  | + |
| smorf42433 | 0 | 0 | 0 | 1 | 4 | 569451  | 569549  | + |
| smorf42437 | 0 | 0 | 0 | 1 | 4 | 570096  | 570146  | + |
| smorf42704 | 0 | 0 | 0 | 1 | 4 | 645078  | 645116  | + |
| smorf42836 | 0 | 0 | 0 | 1 | 4 | 683745  | 683810  | + |
| YDR118W-A  | 1 | 0 | 0 | 0 | 4 | 687765  | 687881  | + |
| smorf42952 | 0 | 0 | 0 | 1 | 4 | 723048  | 723119  | + |
| smorf43305 | 0 | 0 | 0 | 1 | 4 | 831891  | 831941  | + |
| YDR193W    | 1 | 0 | 1 | 0 | 4 | 844551  | 844949  | + |
| YDR199W    | 2 | 0 | 1 | 0 | 4 | 854172  | 854537  | + |
| YDR203W    | 1 | 0 | 1 | 0 | 4 | 857679  | 857996  | + |
| smorf43397 | 0 | 0 | 0 | 1 | 4 | 861804  | 861848  | + |
| YDR241W    | 3 | 0 | 0 | 0 | 4 | 945147  | 945434  | + |
| YDR275W    | 4 | 0 | 1 | 1 | 4 | 1012248 | 1012955 | + |
| smorf43997 | 0 | 0 | 0 | 1 | 4 | 1022082 | 1022126 | + |
| smorf44227 | 0 | 0 | 0 | 1 | 4 | 1080807 | 1080848 | + |
| YDR327W    | 1 | 0 | 1 | 0 | 4 | 1125297 | 1125623 | + |
| YDR360W    | 1 | 0 | 1 | 0 | 4 | 1194591 | 1194977 | + |
| smorf45094 | 0 | 0 | 0 | 1 | 4 | 1301022 | 1301078 | + |
| YDR431W    | 2 | 0 | 1 | 0 | 4 | 1328382 | 1328693 | + |
| smorf45316 | 0 | 0 | 0 | 1 | 4 | 1366614 | 1366670 | + |
| smorf45649 | 0 | 0 | 0 | 1 | 4 | 1466223 | 1466282 | + |
| YDR509W    | 2 | 0 | 1 | 0 | 4 | 1468218 | 1468565 | + |
| YDR524W-C  | 4 | 0 | 0 | 0 | 4 | 1489395 | 1489484 | + |
| smorf45967 | 0 | 0 | 0 | 1 | 4 | 1514879 | 1514941 | - |
| smorf46055 | 0 | 0 | 0 | 1 | 4 | 1493810 | 1493902 | - |
| YDR510C-A  | 2 | 0 | 0 | 0 | 4 | 1469687 | 1469803 | - |
| smorf46506 | 0 | 0 | 0 | 1 | 4 | 1388801 | 1388848 | - |
| smorf46712 | 0 | 0 | 0 | 1 | 4 | 1336931 | 1336981 | - |
| smorf47006 | 0 | 0 | 0 | 1 | 4 | 1261289 | 1261345 | - |
| smorf47342 | 0 | 0 | 0 | 1 | 4 | 1159202 | 1159249 | - |
| YDR281C    | 4 | 0 | 1 | 1 | 4 | 1022003 | 1022317 | - |
| smorf47869 | 0 | 0 | 0 | 1 | 4 | 980738  | 980773  | - |
| smorf48110 | 0 | 0 | 0 | 1 | 4 | 911234  | 911290  | - |
| YDR187C    | 1 | 0 | 1 | 0 | 4 | 836225  | 836743  | - |
| YDR133C    | 2 | 0 | 1 | 1 | 4 | 720959  | 721294  | - |
| smorf49024 | 0 | 0 | 0 | 1 | 4 | 658052  | 658084  | - |
| smorf49050 | 0 | 0 | 0 | 1 | 4 | 652652  | 652684  | - |
| smorf49153 | 0 | 0 | 0 | 1 | 4 | 621467  | 621499  | - |
| smorf49220 | 0 | 0 | 0 | 1 | 4 | 599945  | 599977  | - |
| YDR048C    | 2 | 0 | 1 | 0 | 4 | 553082  | 553396  | - |
| smorf49728 | 0 | 0 | 0 | 1 | 4 | 454946  | 454984  | - |
| smorf49813 | 0 | 0 | 0 | 1 | 4 | 431948  | 432013  | - |
| YDL016C    | 1 | 0 | 1 | 0 | 4 | 425567  | 425869  | - |
| YDL023C    | 1 | 0 | 1 | 0 | 4 | 411758  | 412078  | - |
| YDL022C-A  | 2 | 0 | 0 | 0 | 4 | 409805  | 410053  | - |
| YDL039C    | 4 | 0 | 1 | 0 | 4 | 381983  | 382330  | - |
| smorf50137 | 0 | 0 | 0 | 1 | 4 | 336203  | 336235  | - |

|            |   |   |   |   |   |         |         |   |
|------------|---|---|---|---|---|---------|---------|---|
| smorf50540 | 0 | 0 | 0 | 1 | 4 | 233984  | 234019  | - |
| smorf50633 | 0 | 0 | 0 | 1 | 4 | 212423  | 212476  | - |
| YDL158C    | 2 | 0 | 1 | 0 | 4 | 173867  | 174175  | - |
| YDL162C    | 3 | 0 | 1 | 0 | 4 | 167360  | 167716  | - |
| YDL187C    | 3 | 0 | 1 | 0 | 4 | 125510  | 125839  | - |
| smorf50948 | 0 | 0 | 0 | 1 | 4 | 106886  | 106924  | - |
| smorf50973 | 0 | 0 | 0 | 1 | 4 | 95789   | 95860   | - |
| YDR543C    | 4 | 0 | 1 | 0 | 4 | 1524619 | 1524918 | - |
| YDR537C    | 1 | 1 | 1 | 0 | 4 | 1510846 | 1511451 | - |
| YDR504C    | 3 | 0 | 1 | 0 | 4 | 1456303 | 1456686 | - |
| smorf51627 | 0 | 0 | 0 | 1 | 4 | 1436611 | 1436718 | - |
| YDR467C    | 1 | 0 | 1 | 0 | 4 | 1397575 | 1397901 | - |
| YDR455C    | 2 | 0 | 1 | 0 | 4 | 1367365 | 1367673 | - |
| YDR426C    | 2 | 0 | 1 | 0 | 4 | 1321621 | 1321998 | - |
| smorf52220 | 0 | 0 | 0 | 1 | 4 | 1258339 | 1258491 | - |
| smorf52555 | 0 | 0 | 0 | 1 | 4 | 1178314 | 1178373 | - |
| smorf52575 | 0 | 0 | 0 | 1 | 4 | 1174654 | 1174851 | - |
| YDR344C    | 3 | 0 | 1 | 0 | 4 | 1162000 | 1162443 | - |
| YDR271C    | 3 | 0 | 1 | 0 | 4 | 1008391 | 1008762 | - |
| smorf53287 | 0 | 0 | 0 | 1 | 4 | 1005046 | 1005117 | - |
| YDR250C    | 4 | 0 | 0 | 0 | 4 | 960082  | 960357  | - |
| smorf53563 | 0 | 0 | 0 | 1 | 4 | 945892  | 945936  | - |
| smorf53652 | 0 | 0 | 0 | 1 | 4 | 917170  | 917232  | - |
| smorf53654 | 0 | 0 | 0 | 1 | 4 | 916021  | 916134  | - |
| smorf53663 | 0 | 0 | 0 | 1 | 4 | 913627  | 913743  | - |
| YDR215C    | 3 | 0 | 1 | 0 | 4 | 894115  | 894498  | - |
| smorf53766 | 0 | 0 | 0 | 1 | 4 | 878047  | 878079  | - |
| YDR209C    | 3 | 0 | 1 | 0 | 4 | 871033  | 871446  | - |
| YDR154C    | 2 | 0 | 1 | 1 | 4 | 768400  | 768750  | - |
| YDR136C    | 3 | 0 | 1 | 0 | 4 | 727708  | 728280  | - |
| smorf54585 | 0 | 0 | 0 | 1 | 4 | 654688  | 654765  | - |
| smorf54726 | 0 | 0 | 0 | 1 | 4 | 620980  | 621012  | - |
| smorf54868 | 0 | 0 | 0 | 1 | 4 | 593206  | 593301  | - |
| smorf54933 | 0 | 0 | 0 | 1 | 4 | 575737  | 575853  | - |
| YDR042C    | 4 | 0 | 1 | 0 | 4 | 540598  | 541200  | - |
| smorf55218 | 0 | 0 | 0 | 1 | 4 | 489124  | 489162  | - |
| smorf55290 | 0 | 0 | 0 | 1 | 4 | 471439  | 471495  | - |
| smorf55351 | 0 | 0 | 0 | 1 | 4 | 456238  | 456270  | - |
| YDL007C-A  | 4 | 0 | 0 | 0 | 4 | 436564  | 436821  | - |
| smorf55425 | 0 | 0 | 0 | 1 | 4 | 436168  | 436251  | - |
| YDL009C    | 1 | 0 | 1 | 0 | 4 | 432922  | 43245   | - |
| smorf55658 | 0 | 0 | 0 | 1 | 4 | 371014  | 371046  | - |
| smorf55670 | 0 | 0 | 0 | 1 | 4 | 366526  | 366576  | - |
| YDL071C    | 4 | 0 | 1 | 0 | 4 | 330667  | 331041  | - |
| smorf55909 | 0 | 0 | 0 | 1 | 4 | 292423  | 292590  | - |
| smorf56030 | 0 | 0 | 0 | 1 | 4 | 251278  | 251316  | - |
| smorf56077 | 0 | 0 | 0 | 1 | 4 | 241069  | 241131  | - |
| smorf56119 | 0 | 0 | 0 | 1 | 4 | 228826  | 228873  | - |
| smorf56326 | 0 | 0 | 0 | 1 | 4 | 169915  | 169965  | - |
| smorf56867 | 0 | 0 | 0 | 1 | 4 | 32011   | 32058   | - |
| YDL240C-A  | 3 | 1 | 0 | 0 | 4 | 22471   | 22608   | - |
| smorf56916 | 0 | 0 | 0 | 1 | 4 | 18775   | 18831   | - |
| YDR491C    | 4 | 0 | 1 | 0 | 4 | 1434492 | 1434983 | - |
| smorf57468 | 0 | 0 | 0 | 1 | 4 | 1412298 | 1412366 | - |
| smorf57654 | 0 | 0 | 0 | 1 | 4 | 1362792 | 1362836 | - |
| YDR417C    | 3 | 0 | 1 | 0 | 4 | 1301547 | 1301918 | - |
| smorf58608 | 0 | 0 | 0 | 1 | 4 | 1103211 | 1103294 | - |
| YDR274C    | 3 | 0 | 1 | 0 | 4 | 1011585 | 1011956 | - |
| smorf59063 | 0 | 0 | 0 | 1 | 4 | 966114  | 966170  | - |
| smorf59229 | 0 | 0 | 0 | 1 | 4 | 936189  | 936284  | - |
| YDR220C    | 2 | 0 | 0 | 0 | 4 | 906996  | 907289  | - |
| smorf59350 | 0 | 0 | 0 | 1 | 4 | 892692  | 892763  | - |
| smorf59455 | 0 | 0 | 0 | 1 | 4 | 870687  | 870725  | - |
| YDR183C-A  | 4 | 0 | 0 | 0 | 4 | 830394  | 830651  | - |
| YDR169C-A  | 2 | 0 | 0 | 0 | 4 | 794571  | 794720  | - |
| smorf59800 | 0 | 0 | 0 | 1 | 4 | 772092  | 772151  | - |
| smorf59810 | 0 | 0 | 0 | 1 | 4 | 770103  | 770177  | - |
| smorf60032 | 0 | 0 | 0 | 1 | 4 | 703803  | 703904  | - |
| YDR114C    | 2 | 0 | 1 | 0 | 4 | 681921  | 682223  | - |
| YDR102C    | 2 | 0 | 1 | 0 | 4 | 657645  | 657977  | - |
| smorf60191 | 0 | 0 | 0 | 1 | 4 | 653022  | 653054  | - |
| YDR095C    | 4 | 0 | 1 | 0 | 4 | 636114  | 636524  | - |
| smorf60266 | 0 | 0 | 0 | 1 | 4 | 630819  | 630872  | - |

|            |   |   |   |   |   |        |        |   |
|------------|---|---|---|---|---|--------|--------|---|
| YDR010C    | 1 | 0 | 1 | 0 | 4 | 465048 | 465380 | - |
| YDR008C    | 1 | 0 | 1 | 0 | 4 | 462249 | 462599 | - |
| smorf60956 | 0 | 0 | 0 | 1 | 4 | 444048 | 444137 | - |
| smorf60991 | 0 | 0 | 0 | 1 | 4 | 434001 | 434060 | - |
| smorf61097 | 0 | 0 | 0 | 1 | 4 | 398877 | 398924 | - |
| smorf61406 | 0 | 0 | 0 | 1 | 4 | 304755 | 304802 | - |
| YDL094C    | 3 | 0 | 1 | 0 | 4 | 289572 | 290081 | - |
| YDL096C    | 1 | 0 | 1 | 0 | 4 | 286998 | 287324 | - |
| smorf61569 | 0 | 0 | 0 | 1 | 4 | 267444 | 267530 | - |
| YDL185C-A  | 4 | 0 | 0 | 0 | 4 | 126609 | 126836 | - |
| smorf62109 | 0 | 0 | 0 | 1 | 4 | 117198 | 117236 | - |
| smorf62112 | 0 | 0 | 0 | 1 | 4 | 115836 | 115898 | - |
| smorf62310 | 0 | 0 | 0 | 1 | 4 | 50589  | 50633  | - |
| smorf62511 | 0 | 0 | 0 | 1 | 5 | 7951   | 8040   | + |
| YEL059W    | 3 | 1 | 1 | 0 | 5 | 42652  | 42960  | + |
| YEL033W    | 4 | 0 | 1 | 0 | 5 | 86179  | 86598  | + |
| YEL028W    | 4 | 0 | 1 | 0 | 5 | 98668  | 99129  | + |
| smorf62932 | 0 | 0 | 0 | 1 | 5 | 118420 | 118458 | + |
| YEL010W    | 1 | 0 | 1 | 0 | 5 | 136279 | 136629 | + |
| YEL008W    | 4 | 0 | 1 | 0 | 5 | 140512 | 140892 | + |
| smorf63050 | 0 | 0 | 0 | 1 | 5 | 151621 | 151719 | + |
| smorf63130 | 0 | 0 | 0 | 1 | 5 | 167041 | 167082 | + |
| smorf63147 | 0 | 0 | 0 | 1 | 5 | 173593 | 173772 | + |
| smorf63519 | 0 | 0 | 0 | 1 | 5 | 270754 | 270825 | + |
| smorf63564 | 0 | 0 | 0 | 1 | 5 | 279910 | 279960 | + |
| YER084W    | 4 | 0 | 1 | 0 | 5 | 327061 | 327447 | + |
| smorf64045 | 0 | 0 | 0 | 1 | 5 | 430519 | 430578 | + |
| YER137W-A  | 1 | 0 | 1 | 0 | 5 | 441571 | 441876 | + |
| YER146W    | 2 | 1 | 0 | 1 | 5 | 462580 | 462861 | + |
| YER158W-A  | 1 | 0 | 0 | 0 | 5 | 491482 | 491697 | + |
| smorf64462 | 0 | 0 | 0 | 1 | 5 | 555322 | 555360 | + |
| YER189W    | 3 | 0 | 1 | 0 | 5 | 571150 | 571518 | + |
| YEL050W-A  | 2 | 0 | 0 | 0 | 5 | 59549  | 59740  | + |
| smorf64775 | 0 | 0 | 0 | 1 | 5 | 65264  | 65317  | + |
| smorf65710 | 0 | 0 | 0 | 1 | 5 | 314201 | 314233 | + |
| YER097W    | 3 | 0 | 1 | 0 | 5 | 355136 | 355465 | + |
| YER107W-A  | 3 | 0 | 1 | 0 | 5 | 374390 | 374710 | + |
| smorf66025 | 0 | 0 | 0 | 1 | 5 | 399110 | 399145 | + |
| YER121W    | 2 | 0 | 1 | 1 | 5 | 402371 | 402715 | + |
| smorf66203 | 0 | 0 | 0 | 1 | 5 | 437984 | 438034 | + |
| YER152W-A  | 1 | 0 | 1 | 0 | 5 | 473480 | 474046 | + |
| smorf66586 | 0 | 0 | 0 | 1 | 5 | 535811 | 535897 | + |
| smorf66604 | 0 | 0 | 0 | 1 | 5 | 541139 | 541216 | + |
| YEL074W    | 1 | 0 | 1 | 0 | 5 | 6126   | 6464   | + |
| smorf66747 | 0 | 0 | 0 | 1 | 5 | 9996   | 10034  | + |
| smorf66755 | 0 | 1 | 0 | 1 | 5 | 11295  | 11366  | + |
| smorf66822 | 0 | 0 | 0 | 1 | 5 | 26121  | 26192  | + |
| smorf66888 | 0 | 0 | 0 | 1 | 5 | 45600  | 45656  | + |
| smorf66919 | 0 | 0 | 0 | 1 | 5 | 53862  | 53975  | + |
| smorf67383 | 0 | 0 | 0 | 1 | 5 | 192408 | 192488 | + |
| smorf67420 | 0 | 0 | 0 | 1 | 5 | 207645 | 207695 | + |
| smorf67539 | 0 | 0 | 0 | 1 | 5 | 240741 | 240779 | + |
| YER046W-A  | 1 | 0 | 1 | 0 | 5 | 243699 | 244028 | + |
| YER076W-A  | 3 | 0 | 1 | 0 | 5 | 313386 | 313733 | + |
| YER078W-A  | 2 | 0 | 0 | 0 | 5 | 318642 | 318806 | + |
| smorf67915 | 0 | 0 | 0 | 1 | 5 | 336690 | 336863 | + |
| smorf67961 | 0 | 0 | 0 | 1 | 5 | 347898 | 347951 | + |
| smorf68026 | 0 | 0 | 0 | 1 | 5 | 363729 | 363782 | + |
| smorf68051 | 0 | 0 | 0 | 1 | 5 | 373230 | 373307 | + |
| smorf68094 | 0 | 1 | 0 | 1 | 5 | 382479 | 382559 | + |
| smorf68273 | 0 | 0 | 0 | 1 | 5 | 430731 | 430793 | + |
| YER133W-A  | 1 | 0 | 1 | 0 | 5 | 437187 | 437528 | + |
| smorf68350 | 0 | 0 | 0 | 1 | 5 | 449586 | 449654 | + |
| YER175W-A  | 2 | 0 | 0 | 1 | 5 | 540645 | 540809 | + |
| YER188W    | 4 | 0 | 1 | 0 | 5 | 568035 | 568754 | + |
| smorf68853 | 0 | 0 | 0 | 1 | 5 | 561120 | 561182 | - |
| YER165C-A  | 2 | 0 | 1 | 0 | 5 | 512622 | 512978 | - |
| YER147C-A  | 2 | 1 | 1 | 0 | 5 | 465198 | 465608 | - |
| YER145C-A  | 2 | 1 | 1 | 0 | 5 | 462381 | 462818 | - |
| smorf69388 | 0 | 0 | 0 | 1 | 5 | 412839 | 412898 | - |
| smorf69431 | 0 | 0 | 0 | 1 | 5 | 402234 | 402275 | - |
| YER119C-A  | 4 | 1 | 1 | 0 | 5 | 400863 | 401234 | - |
| YER068C-A  | 2 | 0 | 1 | 0 | 5 | 295299 | 295730 | - |

|            |   |   |   |   |   |        |        |   |
|------------|---|---|---|---|---|--------|--------|---|
| smorf70338 | 0 | 0 | 0 | 1 | 5 | 177402 | 177560 | - |
| YER006C-A  | 3 | 0 | 1 | 0 | 5 | 164343 | 164660 | - |
| smorf70420 | 0 | 0 | 0 | 1 | 5 | 156384 | 156431 | - |
| smorf70503 | 0 | 0 | 0 | 1 | 5 | 136851 | 136916 | - |
| YEL009C-A  | 1 | 0 | 1 | 0 | 5 | 136371 | 136778 | - |
| smorf70505 | 0 | 0 | 0 | 1 | 5 | 136110 | 136319 | - |
| smorf70585 | 0 | 0 | 0 | 1 | 5 | 110916 | 111017 | - |
| smorf70909 | 0 | 0 | 0 | 1 | 5 | 16041  | 16097  | - |
| smorf70939 | 0 | 0 | 0 | 1 | 5 | 8742   | 8774   | - |
| YER188C-A  | 4 | 0 | 1 | 0 | 5 | 569603 | 569902 | - |
| smorf71004 | 0 | 0 | 0 | 1 | 5 | 562709 | 562747 | - |
| YER135C    | 1 | 0 | 1 | 0 | 5 | 437948 | 438340 | - |
| smorf71467 | 0 | 0 | 0 | 1 | 5 | 435491 | 435532 | - |
| smorf71579 | 0 | 0 | 0 | 1 | 5 | 410150 | 410194 | - |
| smorf71700 | 0 | 0 | 0 | 1 | 5 | 364208 | 364246 | - |
| YER091C-A  | 4 | 1 | 0 | 0 | 5 | 342386 | 342607 | - |
| YER079C-A  | 1 | 0 | 1 | 0 | 5 | 319898 | 320236 | - |
| smorf71940 | 0 | 0 | 0 | 1 | 5 | 295199 | 295255 | - |
| YER066C-A  | 4 | 0 | 1 | 0 | 5 | 291701 | 292201 | - |
| smorf72061 | 0 | 0 | 0 | 1 | 5 | 261278 | 261373 | - |
| smorf72112 | 0 | 0 | 0 | 1 | 5 | 249749 | 249793 | - |
| smorf72120 | 0 | 0 | 0 | 1 | 5 | 248804 | 248851 | - |
| smorf72312 | 0 | 0 | 0 | 1 | 5 | 187994 | 188047 | - |
| smorf72319 | 0 | 0 | 0 | 1 | 5 | 187109 | 187141 | - |
| smorf72431 | 0 | 0 | 0 | 1 | 5 | 151757 | 151795 | - |
| YEL014C    | 4 | 0 | 1 | 0 | 5 | 128303 | 128608 | - |
| smorf72632 | 0 | 0 | 0 | 1 | 5 | 106787 | 106822 | - |
| smorf72649 | 0 | 0 | 0 | 1 | 5 | 99461  | 99493  | - |
| YEL030C-A  | 1 | 0 | 1 | 0 | 5 | 94583  | 94897  | - |
| YEL034C-A  | 3 | 0 | 1 | 0 | 5 | 85613  | 86215  | - |
| YEL045C    | 4 | 1 | 1 | 0 | 5 | 68840  | 69265  | - |
| smorf72795 | 0 | 0 | 0 | 1 | 5 | 61577  | 61729  | - |
| YEL057C    | 4 | 1 | 1 | 0 | 5 | 45020  | 45721  | - |
| YEL067C    | 3 | 0 | 1 | 0 | 5 | 26189  | 26776  | - |
| YEL068C    | 4 | 0 | 1 | 1 | 5 | 25646  | 25978  | - |
| smorf72984 | 0 | 0 | 0 | 1 | 5 | 11255  | 11296  | - |
| smorf72993 | 0 | 0 | 0 | 1 | 5 | 9080   | 9133   | - |
| YEL075C    | 3 | 0 | 1 | 0 | 5 | 5345   | 5713   | - |
| YER186C    | 4 | 0 | 1 | 0 | 5 | 561700 | 562620 | - |
| smorf73146 | 0 | 0 | 0 | 1 | 5 | 546496 | 546540 | - |
| smorf73164 | 0 | 0 | 0 | 1 | 5 | 541351 | 541413 | - |
| YER088C-A  | 4 | 0 | 1 | 0 | 5 | 335692 | 336015 | - |
| YER087C-A  | 1 | 1 | 1 | 0 | 5 | 331813 | 332364 | - |
| smorf73888 | 0 | 0 | 0 | 1 | 5 | 307234 | 307470 | - |
| smorf73957 | 0 | 0 | 0 | 1 | 5 | 288238 | 288276 | - |
| smorf74267 | 0 | 0 | 0 | 1 | 5 | 193123 | 193170 | - |
| smorf74305 | 0 | 0 | 0 | 1 | 5 | 178447 | 178578 | - |
| smorf74443 | 0 | 0 | 0 | 1 | 5 | 143881 | 143985 | - |
| smorf74625 | 0 | 0 | 0 | 1 | 5 | 98596  | 98640  | - |
| YEL035C    | 4 | 0 | 1 | 0 | 5 | 85045  | 85545  | - |
| smorf74705 | 0 | 0 | 0 | 1 | 5 | 76984  | 77025  | - |
| smorf74938 | 0 | 0 | 0 | 1 | 5 | 13210  | 13266  | - |
| smorf75320 | 0 | 0 | 0 | 1 | 6 | 89674  | 89748  | + |
| smorf75360 | 0 | 0 | 0 | 1 | 6 | 99124  | 99189  | + |
| YFL012W-A  | 4 | 0 | 1 | 0 | 6 | 109804 | 110178 | + |
| YFL012W    | 4 | 0 | 1 | 0 | 6 | 110641 | 111087 | + |
| YFR012W-A  | 4 | 0 | 0 | 0 | 6 | 169216 | 169302 | + |
| smorf75733 | 0 | 0 | 0 | 1 | 6 | 191881 | 191916 | + |
| smorf75742 | 0 | 0 | 0 | 1 | 6 | 193462 | 193518 | + |
| smorf75904 | 0 | 0 | 0 | 1 | 6 | 245497 | 245532 | + |
| YFL068W    | 3 | 0 | 1 | 0 | 6 | 53     | 535    | + |
| YFL063W    | 4 | 0 | 1 | 0 | 6 | 5066   | 5521   | + |
| YFL032W    | 4 | 0 | 1 | 0 | 6 | 74870  | 75190  | + |
| smorf76229 | 0 | 0 | 0 | 1 | 6 | 89600  | 89644  | + |
| YFL015W-A  | 1 | 0 | 1 | 0 | 6 | 106409 | 106726 | + |
| smorf76365 | 0 | 0 | 0 | 1 | 6 | 134954 | 135001 | + |
| smorf76511 | 0 | 0 | 0 | 1 | 6 | 192305 | 192346 | + |
| YFR034W-A  | 3 | 0 | 0 | 0 | 6 | 226010 | 226297 | + |
| smorf76764 | 0 | 0 | 0 | 1 | 6 | 262199 | 262249 | + |
| smorf77007 | 0 | 0 | 0 | 1 | 6 | 47919  | 47951  | + |
| smorf77054 | 0 | 0 | 0 | 1 | 6 | 55002  | 55091  | + |
| smorf77148 | 0 | 0 | 0 | 1 | 6 | 78978  | 79094  | + |
| smorf77213 | 0 | 0 | 0 | 1 | 6 | 100179 | 100244 | + |

|            |   |   |   |   |   |         |         |   |
|------------|---|---|---|---|---|---------|---------|---|
| YFL013W-A  | 1 | 1 | 1 | 0 | 6 | 107793  | 108596  | + |
| YFL010W-A  | 3 | 1 | 0 | 0 | 6 | 114984  | 115268  | + |
| YFR020W    | 3 | 0 | 1 | 1 | 6 | 192726  | 193424  | + |
| smorf77833 | 0 | 0 | 0 | 1 | 6 | 260552  | 260584  | - |
| YFR054C    | 2 | 0 | 1 | 0 | 6 | 258842  | 259420  | - |
| YFR035C    | 3 | 0 | 1 | 0 | 6 | 226109  | 226453  | - |
| YFR026C    | 3 | 0 | 1 | 0 | 6 | 205736  | 206245  | - |
| smorf78218 | 0 | 0 | 0 | 1 | 6 | 149729  | 149770  | - |
| smorf78313 | 0 | 0 | 0 | 1 | 6 | 123035  | 123070  | - |
| YFL015C    | 3 | 0 | 1 | 0 | 6 | 106463  | 106957  | - |
| YFL021C-A  | 3 | 0 | 1 | 0 | 6 | 95759   | 96613   | - |
| smorf78424 | 0 | 0 | 0 | 1 | 6 | 77465   | 77524   | - |
| YFR056C    | 2 | 0 | 1 | 0 | 6 | 263944  | 264312  | - |
| smorf78711 | 0 | 0 | 0 | 1 | 6 | 263068  | 263109  | - |
| smorf78882 | 0 | 0 | 0 | 1 | 6 | 207121  | 207261  | - |
| smorf79073 | 0 | 0 | 0 | 1 | 6 | 158926  | 159009  | - |
| YFL019C    | 2 | 0 | 1 | 0 | 6 | 100246  | 100599  | - |
| smorf79717 | 0 | 0 | 0 | 1 | 6 | 4204    | 4263    | - |
| YFR052C-A  | 3 | 0 | 1 | 1 | 6 | 253416  | 253721  | - |
| YFR032C-B  | 4 | 1 | 0 | 0 | 6 | 223698  | 223961  | - |
| smorf80369 | 0 | 0 | 0 | 1 | 6 | 87627   | 87728   | - |
| smorf80529 | 0 | 0 | 0 | 1 | 6 | 30987   | 31049   | - |
| smorf80745 | 0 | 0 | 0 | 1 | 7 | 27832   | 27864   | + |
| smorf80888 | 0 | 0 | 0 | 1 | 7 | 80590   | 80730   | + |
| YGL149W    | 4 | 0 | 1 | 0 | 7 | 225577  | 225882  | + |
| smorf81745 | 0 | 0 | 0 | 1 | 7 | 320044  | 320127  | + |
| smorf81759 | 0 | 0 | 0 | 1 | 7 | 324412  | 324528  | + |
| smorf82010 | 0 | 0 | 0 | 1 | 7 | 397786  | 397863  | + |
| smorf82091 | 0 | 0 | 0 | 1 | 7 | 423463  | 423528  | + |
| YGL007W    | 4 | 0 | 1 | 0 | 7 | 483265  | 483642  | + |
| smorf82292 | 0 | 0 | 0 | 1 | 7 | 484081  | 484125  | + |
| YGL006W-A  | 2 | 0 | 0 | 0 | 7 | 485428  | 485538  | + |
| smorf82352 | 0 | 0 | 0 | 1 | 7 | 497209  | 497346  | + |
| smorf82357 | 0 | 0 | 0 | 1 | 7 | 498199  | 498249  | + |
| YGR035W-A  | 4 | 0 | 0 | 0 | 7 | 557569  | 557790  | + |
| smorf82652 | 0 | 0 | 0 | 1 | 7 | 582529  | 582618  | + |
| smorf82694 | 0 | 0 | 0 | 1 | 7 | 593200  | 593247  | + |
| smorf82788 | 0 | 0 | 0 | 1 | 7 | 616363  | 616407  | + |
| smorf82793 | 0 | 0 | 0 | 1 | 7 | 617440  | 617502  | + |
| smorf82812 | 0 | 0 | 0 | 1 | 7 | 622252  | 622290  | + |
| smorf83149 | 0 | 0 | 0 | 1 | 7 | 700111  | 700164  | + |
| YGR121W-A  | 1 | 0 | 0 | 0 | 7 | 733417  | 733632  | + |
| smorf83285 | 0 | 0 | 0 | 1 | 7 | 751753  | 751794  | + |
| YGR161W-C  | 4 | 1 | 0 | 1 | 7 | 810232  | 810510  | + |
| YGR176W    | 4 | 0 | 1 | 0 | 7 | 848725  | 849072  | + |
| smorf83652 | 0 | 0 | 0 | 1 | 7 | 850819  | 850908  | + |
| smorf84105 | 0 | 0 | 0 | 1 | 7 | 969871  | 969936  | + |
| YGR242W    | 3 | 0 | 1 | 0 | 7 | 976420  | 976728  | + |
| YGR265W    | 3 | 1 | 1 | 0 | 7 | 1021654 | 1022064 | + |
| smorf84360 | 0 | 0 | 0 | 1 | 7 | 1052077 | 1052133 | + |
| smorf84449 | 0 | 0 | 0 | 1 | 7 | 1079131 | 1079178 | + |
| smorf84505 | 0 | 0 | 0 | 1 | 7 | 2411    | 2464    | + |
| YGL260W    | 4 | 0 | 0 | 0 | 7 | 6860    | 7090    | + |
| smorf84832 | 0 | 0 | 0 | 1 | 7 | 78776   | 78865   | + |
| YGL214W    | 1 | 0 | 1 | 0 | 7 | 90011   | 90499   | + |
| smorf84862 | 0 | 0 | 0 | 1 | 7 | 95192   | 95242   | + |
| smorf85003 | 0 | 0 | 0 | 1 | 7 | 147767  | 147814  | + |
| smorf85155 | 0 | 0 | 0 | 1 | 7 | 193649  | 193708  | + |
| smorf85397 | 0 | 0 | 0 | 1 | 7 | 263978  | 264013  | + |
| smorf85459 | 0 | 0 | 0 | 1 | 7 | 280871  | 281014  | + |
| smorf85987 | 0 | 0 | 0 | 1 | 7 | 427322  | 427393  | + |
| YGR011W    | 1 | 0 | 1 | 1 | 7 | 512501  | 512827  | + |
| YGR025W    | 4 | 0 | 1 | 0 | 7 | 532643  | 532945  | + |
| smorf86488 | 0 | 1 | 0 | 1 | 7 | 567740  | 567775  | + |
| smorf86494 | 0 | 0 | 0 | 1 | 7 | 568520  | 568570  | + |
| YGR039W    | 4 | 0 | 1 | 1 | 7 | 574892  | 575203  | + |
| smorf86619 | 0 | 0 | 0 | 1 | 7 | 605705  | 605821  | + |
| smorf86621 | 0 | 0 | 0 | 1 | 7 | 607295  | 607333  | + |
| YGR107W    | 4 | 0 | 1 | 0 | 7 | 702671  | 703120  | + |
| YGR137W    | 1 | 0 | 1 | 1 | 7 | 762893  | 763267  | + |
| YGR139W    | 4 | 0 | 1 | 0 | 7 | 765731  | 766069  | + |
| smorf87446 | 0 | 0 | 0 | 1 | 7 | 848543  | 848581  | + |
| smorf87578 | 0 | 0 | 0 | 1 | 7 | 884519  | 884578  | + |

|            |   |   |   |   |   |         |         |   |
|------------|---|---|---|---|---|---------|---------|---|
| smorf87988 | 0 | 0 | 0 | 1 | 7 | 1014671 | 1014724 | + |
| smorf88172 | 0 | 0 | 0 | 1 | 7 | 1050617 | 1050664 | + |
| smorf88327 | 0 | 0 | 0 | 1 | 7 | 1083083 | 1083121 | + |
| smorf88409 | 0 | 0 | 0 | 1 | 7 | 18942   | 19028   | + |
| YGL218W    | 1 | 0 | 1 | 0 | 7 | 83649   | 84299   | + |
| smorf88940 | 0 | 0 | 0 | 1 | 7 | 140286  | 140321  | + |
| YGL168W    | 3 | 0 | 1 | 0 | 7 | 187470  | 187802  | + |
| smorf89120 | 0 | 0 | 0 | 1 | 7 | 190782  | 190814  | + |
| YGL132W    | 1 | 0 | 1 | 0 | 7 | 261585  | 261920  | + |
| smorf89429 | 0 | 0 | 0 | 1 | 7 | 274692  | 274733  | + |
| YGL109W    | 2 | 0 | 1 | 0 | 7 | 303516  | 303839  | + |
| smorf89625 | 0 | 0 | 0 | 1 | 7 | 328071  | 328109  | + |
| smorf89629 | 0 | 0 | 0 | 1 | 7 | 328797  | 328859  | + |
| smorf89721 | 0 | 0 | 0 | 1 | 7 | 349503  | 349535  | + |
| smorf89852 | 0 | 0 | 0 | 1 | 7 | 383574  | 383615  | + |
| YGL052W    | 3 | 0 | 1 | 0 | 7 | 403440  | 403745  | + |
| YGL024W    | 4 | 0 | 1 | 0 | 7 | 449793  | 450128  | + |
| smorf90320 | 0 | 0 | 0 | 1 | 7 | 523263  | 523295  | + |
| smorf90429 | 0 | 0 | 0 | 1 | 7 | 559632  | 559670  | + |
| YGR064W    | 2 | 0 | 1 | 0 | 7 | 617625  | 617993  | + |
| YGR069W    | 2 | 0 | 1 | 0 | 7 | 627087  | 627422  | + |
| smorf90910 | 0 | 0 | 0 | 1 | 7 | 707037  | 707102  | + |
| smorf91035 | 0 | 0 | 0 | 1 | 7 | 729969  | 730064  | + |
| smorf91067 | 0 | 0 | 0 | 1 | 7 | 736545  | 736595  | + |
| smorf91081 | 0 | 0 | 0 | 1 | 7 | 739431  | 739466  | + |
| smorf91220 | 0 | 0 | 0 | 1 | 7 | 778239  | 778274  | + |
| smorf91231 | 0 | 0 | 0 | 1 | 7 | 780240  | 780278  | + |
| smorf91458 | 0 | 0 | 0 | 1 | 7 | 842718  | 842804  | + |
| YGR174W-A  | 1 | 0 | 0 | 1 | 7 | 846660  | 846746  | + |
| smorf91526 | 0 | 0 | 0 | 1 | 7 | 856395  | 856460  | + |
| smorf91842 | 0 | 0 | 0 | 1 | 7 | 939393  | 939452  | + |
| smorf91935 | 0 | 0 | 0 | 1 | 7 | 959277  | 959390  | + |
| smorf91972 | 0 | 0 | 0 | 1 | 7 | 968982  | 969029  | + |
| smorf91978 | 0 | 0 | 0 | 1 | 7 | 970359  | 970427  | + |
| smorf92062 | 0 | 0 | 0 | 1 | 7 | 994323  | 994376  | + |
| YGR269W    | 4 | 0 | 1 | 0 | 7 | 1026642 | 1026968 | + |
| YGR290W    | 1 | 0 | 1 | 0 | 7 | 1075488 | 1075931 | + |
| YGR291C    | 2 | 0 | 0 | 0 | 7 | 1076289 | 1076510 | - |
| smorf92856 | 0 | 0 | 0 | 1 | 7 | 944652  | 944711  | - |
| YGR204C-A  | 2 | 0 | 0 | 0 | 7 | 909066  | 909179  | - |
| smorf93508 | 0 | 0 | 0 | 1 | 7 | 757302  | 757373  | - |
| smorf93603 | 0 | 0 | 0 | 1 | 7 | 735936  | 735971  | - |
| smorf93719 | 0 | 0 | 0 | 1 | 7 | 702669  | 702731  | - |
| YGR073C    | 2 | 0 | 1 | 0 | 7 | 635619  | 635990  | - |
| smorf94182 | 0 | 0 | 0 | 1 | 7 | 584688  | 584723  | - |
| YGR045C    | 3 | 1 | 1 | 0 | 7 | 583938  | 584300  | - |
| smorf94358 | 0 | 0 | 0 | 1 | 7 | 535677  | 535742  | - |
| smorf94506 | 0 | 0 | 0 | 1 | 7 | 506619  | 506678  | - |
| YGL007C-A  | 4 | 0 | 0 | 0 | 7 | 482946  | 483032  | - |
| YGL015C    | 4 | 1 | 1 | 0 | 7 | 465048  | 465440  | - |
| smorf94949 | 0 | 0 | 0 | 1 | 7 | 393540  | 393611  | - |
| smorf95240 | 0 | 0 | 0 | 1 | 7 | 312918  | 312971  | - |
| smorf95573 | 0 | 0 | 0 | 1 | 7 | 213684  | 213764  | - |
| smorf95726 | 0 | 0 | 0 | 1 | 7 | 166047  | 166079  | - |
| YGL188C    | 4 | 0 | 0 | 1 | 7 | 149349  | 149522  | - |
| YGL188C-A  | 2 | 0 | 0 | 1 | 7 | 148830  | 148970  | - |
| smorf95812 | 0 | 0 | 0 | 1 | 7 | 142845  | 142883  | - |
| smorf96008 | 0 | 0 | 0 | 1 | 7 | 97359   | 97409   | - |
| YGL239C    | 4 | 0 | 1 | 0 | 7 | 49431   | 49745   | - |
| smorf96264 | 0 | 0 | 0 | 1 | 7 | 17652   | 17702   | - |
| YGR293C    | 3 | 0 | 1 | 0 | 7 | 1079891 | 1080352 | - |
| smorf96578 | 0 | 0 | 0 | 1 | 7 | 1022303 | 1022368 | - |
| YGR240C-A  | 2 | 0 | 0 | 0 | 7 | 974582  | 974782  | - |
| YGR190C    | 2 | 0 | 1 | 0 | 7 | 880301  | 880666  | - |
| YGR168C    | 4 | 0 | 1 | 0 | 7 | 833357  | 834487  | - |
| smorf97346 | 0 | 0 | 0 | 1 | 7 | 810800  | 810877  | - |
| smorf97375 | 0 | 0 | 0 | 1 | 7 | 801305  | 801340  | - |
| smorf97381 | 0 | 0 | 0 | 1 | 7 | 800087  | 800122  | - |
| smorf97443 | 0 | 0 | 0 | 1 | 7 | 788621  | 788662  | - |
| smorf97606 | 0 | 0 | 0 | 1 | 7 | 742127  | 742186  | - |
| smorf97641 | 0 | 0 | 0 | 1 | 7 | 733088  | 733153  | - |
| YGR114C    | 3 | 0 | 1 | 0 | 7 | 720269  | 720658  | - |
| YGR051C    | 4 | 0 | 1 | 0 | 7 | 592910  | 593233  | - |

|             |   |   |   |   |   |         |         |   |
|-------------|---|---|---|---|---|---------|---------|---|
| smorf98229  | 0 | 0 | 0 | 1 | 7 | 578588  | 578620  | - |
| smorf98374  | 0 | 0 | 0 | 1 | 7 | 544250  | 544306  | - |
| smorf98451  | 0 | 0 | 0 | 1 | 7 | 523250  | 523357  | - |
| smorf98594  | 0 | 0 | 0 | 1 | 7 | 484817  | 484855  | - |
| smorf98709  | 0 | 0 | 0 | 1 | 7 | 443324  | 443368  | - |
| smorf98720  | 0 | 0 | 0 | 1 | 7 | 439850  | 439885  | - |
| smorf98721  | 0 | 0 | 0 | 1 | 7 | 439748  | 439789  | - |
| YGL041C-B   | 3 | 0 | 0 | 0 | 7 | 418709  | 418891  | - |
| YGL042C     | 2 | 0 | 1 | 0 | 7 | 418292  | 418597  | - |
| YGL072C     | 2 | 0 | 1 | 0 | 7 | 371006  | 371365  | - |
| smorf98974  | 0 | 0 | 0 | 1 | 7 | 366572  | 366604  | - |
| smorf99156  | 0 | 0 | 0 | 1 | 7 | 316757  | 316792  | - |
| smorf99164  | 0 | 0 | 0 | 1 | 7 | 314270  | 314311  | - |
| YGL118C     | 3 | 0 | 1 | 0 | 7 | 288020  | 288457  | - |
| smorf99261  | 0 | 0 | 0 | 1 | 7 | 287051  | 287089  | - |
| smorf99482  | 0 | 0 | 0 | 1 | 7 | 226082  | 226147  | - |
| smorf99769  | 0 | 0 | 0 | 1 | 7 | 159650  | 159688  | - |
| smorf100721 | 0 | 0 | 0 | 1 | 7 | 1000165 | 1000230 | - |
| smorf100794 | 0 | 0 | 0 | 1 | 7 | 985699  | 985752  | - |
| smorf100834 | 0 | 0 | 0 | 1 | 7 | 974215  | 974337  | - |
| smorf100895 | 0 | 0 | 0 | 1 | 7 | 958933  | 958974  | - |
| smorf101250 | 0 | 0 | 0 | 1 | 7 | 879781  | 879813  | - |
| YGR182C     | 3 | 0 | 1 | 0 | 7 | 858556  | 858909  | - |
| smorf101381 | 0 | 0 | 0 | 1 | 7 | 832018  | 832071  | - |
| smorf101468 | 0 | 0 | 0 | 1 | 7 | 811213  | 811263  | - |
| YGR146C-A   | 4 | 0 | 0 | 0 | 7 | 785281  | 785442  | - |
| smorf101972 | 0 | 0 | 0 | 1 | 7 | 678058  | 678105  | - |
| smorf101997 | 0 | 0 | 0 | 1 | 7 | 670585  | 670626  | - |
| smorf102070 | 0 | 0 | 0 | 1 | 7 | 653920  | 653988  | - |
| YGR050C     | 3 | 0 | 1 | 1 | 7 | 592090  | 592446  | - |
| smorf102302 | 0 | 0 | 0 | 1 | 7 | 591409  | 591462  | - |
| smorf102346 | 0 | 0 | 0 | 1 | 7 | 577399  | 577431  | - |
| smorf102578 | 0 | 0 | 0 | 1 | 7 | 522658  | 522690  | - |
| smorf102607 | 0 | 0 | 0 | 1 | 7 | 512833  | 512871  | - |
| smorf102881 | 0 | 0 | 0 | 1 | 7 | 438406  | 438486  | - |
| YGL034C     | 4 | 0 | 1 | 0 | 7 | 433219  | 433584  | - |
| smorf103107 | 0 | 0 | 0 | 1 | 7 | 370864  | 370908  | - |
| YGL074C     | 2 | 0 | 1 | 0 | 7 | 368599  | 368925  | - |
| YGL108C     | 4 | 0 | 1 | 1 | 7 | 303652  | 304074  | - |
| smorf103525 | 0 | 0 | 0 | 1 | 7 | 257170  | 257271  | - |
| YGL152C     | 1 | 1 | 1 | 0 | 7 | 216697  | 217374  | - |
| YGL165C     | 2 | 0 | 1 | 0 | 7 | 191404  | 191982  | - |
| YGL170C     | 4 | 0 | 1 | 0 | 7 | 184159  | 185400  | - |
| YGL182C     | 2 | 0 | 1 | 0 | 7 | 157279  | 157602  | - |
| smorf103946 | 0 | 0 | 0 | 1 | 7 | 145378  | 145422  | - |
| YGL193C     | 4 | 1 | 1 | 0 | 7 | 141922  | 142233  | - |
| YGL230C     | 4 | 0 | 1 | 0 | 7 | 63772   | 64215   | - |
| smorf104319 | 0 | 0 | 0 | 1 | 7 | 34906   | 34941   | - |
| smorf104406 | 0 | 0 | 0 | 1 | 7 | 14842   | 14883   | - |
| YHL046W-A   | 1 | 0 | 1 | 0 | 8 | 9979    | 10305   | + |
| smorf104654 | 0 | 0 | 0 | 1 | 8 | 59011   | 59079   | + |
| smorf104709 | 0 | 0 | 0 | 1 | 8 | 76747   | 76794   | + |
| smorf104863 | 0 | 0 | 0 | 1 | 8 | 123895  | 123993  | + |
| YHR014W     | 4 | 0 | 1 | 0 | 8 | 132040  | 132915  | + |
| YHR021W-A   | 3 | 0 | 1 | 1 | 8 | 149218  | 149673  | + |
| smorf104960 | 0 | 0 | 0 | 1 | 8 | 151147  | 151185  | + |
| smorf105197 | 0 | 1 | 0 | 1 | 8 | 203788  | 203823  | + |
| smorf105514 | 0 | 0 | 0 | 1 | 8 | 294064  | 294120  | + |
| YHR125W     | 3 | 0 | 1 | 0 | 8 | 358861  | 359166  | + |
| smorf105691 | 0 | 0 | 0 | 1 | 8 | 364498  | 364530  | + |
| YHR131W-A   | 3 | 0 | 0 | 0 | 8 | 367750  | 367995  | + |
| smorf105966 | 0 | 0 | 0 | 1 | 8 | 429466  | 429498  | + |
| smorf106114 | 0 | 0 | 0 | 1 | 8 | 458206  | 458241  | + |
| YHR180W     | 2 | 0 | 1 | 0 | 8 | 465178  | 465669  | + |
| YHR214W     | 4 | 1 | 1 | 0 | 8 | 541651  | 542262  | + |
| YHL045W     | 4 | 0 | 1 | 0 | 8 | 12500   | 12847   | + |
| YHL041W     | 3 | 0 | 1 | 0 | 8 | 17390   | 17839   | + |
| smorf106642 | 0 | 0 | 0 | 1 | 8 | 32627   | 32662   | + |
| smorf106734 | 0 | 0 | 0 | 1 | 8 | 63038   | 63121   | + |
| YHL015W-A   | 1 | 0 | 0 | 0 | 8 | 74696   | 74779   | + |
| smorf107088 | 0 | 1 | 0 | 1 | 8 | 147224  | 147307  | + |
| YHR028W-A   | 1 | 0 | 1 | 0 | 8 | 167345  | 167665  | + |
| smorf107240 | 0 | 0 | 0 | 1 | 8 | 201716  | 201763  | + |



|             |   |   |   |   |   |        |        |   |
|-------------|---|---|---|---|---|--------|--------|---|
| smorf107439 | 0 | 0 | 0 | 1 | 8 | 255881 | 255955 | + |
| smorf107449 | 0 | 0 | 0 | 1 | 8 | 258044 | 258118 | + |
| YHR093W     | 4 | 0 | 1 | 0 | 8 | 289145 | 289693 | + |
| YHR095W     | 4 | 0 | 1 | 0 | 8 | 292946 | 293380 | + |
| smorf107930 | 0 | 0 | 0 | 1 | 8 | 379766 | 379813 | + |
| YHR157W     | 4 | 0 | 1 | 0 | 8 | 412910 | 413458 | + |
| smorf108318 | 0 | 1 | 0 | 1 | 8 | 497279 | 497326 | + |
| YHR213W-B   | 3 | 0 | 1 | 0 | 8 | 540800 | 541099 | + |
| YHL030W-A   | 1 | 1 | 1 | 0 | 8 | 39072  | 39533  | + |
| YHL006W-A   | 3 | 0 | 1 | 0 | 8 | 97728  | 98081  | + |
| smorf108956 | 0 | 0 | 0 | 1 | 8 | 111591 | 111656 | + |
| smorf108972 | 0 | 0 | 0 | 1 | 8 | 115494 | 115637 | + |
| smorf109013 | 0 | 0 | 0 | 1 | 8 | 122025 | 122075 | + |
| YHR032W-A   | 2 | 0 | 0 | 0 | 8 | 175188 | 175367 | + |
| smorf109256 | 0 | 0 | 0 | 1 | 8 | 201651 | 201719 | + |
| YHR050W-A   | 4 | 1 | 0 | 0 | 8 | 209469 | 209639 | + |
| YHR063W-A   | 4 | 0 | 1 | 0 | 8 | 225444 | 225779 | + |
| YHR086W-A   | 2 | 0 | 0 | 0 | 8 | 280233 | 280394 | + |
| YHR175W-A   | 2 | 0 | 0 | 0 | 8 | 453558 | 453707 | + |
| smorf110033 | 0 | 0 | 0 | 1 | 8 | 461685 | 461747 | + |
| YHR180W-A   | 1 | 0 | 0 | 0 | 8 | 466932 | 467114 | + |
| YHR213W-A   | 2 | 0 | 0 | 0 | 8 | 540549 | 540782 | + |
| smorf110358 | 0 | 1 | 0 | 1 | 8 | 551709 | 551744 | + |
| YHR212C     | 3 | 0 | 1 | 0 | 8 | 537759 | 538094 | - |
| smorf110790 | 0 | 0 | 0 | 1 | 8 | 465387 | 465443 | - |
| YHR130C     | 3 | 0 | 1 | 0 | 8 | 364968 | 365303 | - |
| smorf111229 | 0 | 0 | 0 | 1 | 8 | 354465 | 354566 | - |
| smorf111374 | 0 | 0 | 0 | 1 | 8 | 319788 | 319823 | - |
| smorf111506 | 0 | 0 | 0 | 1 | 8 | 276477 | 276539 | - |
| smorf111615 | 0 | 0 | 0 | 1 | 8 | 235818 | 235901 | - |
| YHR049C-A   | 4 | 0 | 1 | 0 | 8 | 207213 | 207524 | - |
| smorf111723 | 0 | 0 | 0 | 1 | 8 | 207087 | 207131 | - |
| smorf111734 | 0 | 0 | 0 | 1 | 8 | 204180 | 204230 | - |
| smorf111823 | 0 | 0 | 0 | 1 | 8 | 181650 | 181709 | - |
| smorf111826 | 0 | 0 | 0 | 1 | 8 | 181290 | 181322 | - |
| smorf111909 | 0 | 0 | 0 | 1 | 8 | 160239 | 160277 | - |
| smorf111951 | 0 | 0 | 0 | 1 | 8 | 146616 | 146774 | - |
| smorf112012 | 0 | 0 | 0 | 1 | 8 | 127623 | 127712 | - |
| YHL037C     | 4 | 0 | 1 | 0 | 8 | 25698  | 26177  | - |
| smorf112648 | 0 | 0 | 0 | 1 | 8 | 520070 | 520240 | - |
| smorf112860 | 0 | 0 | 0 | 1 | 8 | 464582 | 464635 | - |
| YHR173C     | 4 | 0 | 1 | 0 | 8 | 450815 | 451153 | - |
| smorf112907 | 0 | 0 | 0 | 1 | 8 | 450617 | 450673 | - |
| smorf113148 | 0 | 0 | 0 | 1 | 8 | 386897 | 387010 | - |
| smorf113154 | 0 | 0 | 0 | 1 | 8 | 386000 | 386080 | - |
| smorf113178 | 0 | 0 | 0 | 1 | 8 | 381509 | 381550 | - |
| YHR139C-A   | 3 | 0 | 1 | 0 | 8 | 380111 | 380422 | - |
| YHR126C     | 4 | 1 | 1 | 0 | 8 | 359705 | 360184 | - |
| smorf113258 | 0 | 0 | 0 | 1 | 8 | 357341 | 357391 | - |
| smorf113727 | 0 | 0 | 0 | 1 | 8 | 255779 | 255835 | - |
| smorf113743 | 0 | 0 | 0 | 1 | 8 | 250238 | 250291 | - |
| smorf114116 | 0 | 0 | 0 | 1 | 8 | 149315 | 149437 | - |
| smorf114165 | 0 | 0 | 0 | 1 | 8 | 135200 | 135262 | - |
| YHR214C-E   | 4 | 0 | 1 | 0 | 8 | 551200 | 551499 | - |
| YHR214C-D   | 4 | 0 | 0 | 0 | 8 | 550648 | 550941 | - |
| smorf114808 | 0 | 0 | 0 | 1 | 8 | 517075 | 517149 | - |
| smorf115260 | 0 | 0 | 0 | 1 | 8 | 383815 | 383856 | - |
| smorf115652 | 0 | 0 | 0 | 1 | 8 | 273298 | 273372 | - |
| smorf115731 | 0 | 0 | 0 | 1 | 8 | 242098 | 242193 | - |
| YHR071C-A   | 4 | 0 | 1 | 0 | 8 | 238912 | 239232 | - |
| smorf115744 | 0 | 1 | 0 | 1 | 8 | 238777 | 238809 | - |
| YHR070C-A   | 4 | 0 | 1 | 0 | 8 | 236104 | 236514 | - |
| YHR022C-A   | 2 | 0 | 0 | 0 | 8 | 151210 | 151299 | - |
| YHR007C-A   | 3 | 0 | 0 | 0 | 8 | 122545 | 122760 | - |
| YHL005C     | 4 | 0 | 1 | 0 | 8 | 98824  | 99216  | - |
| smorf116529 | 0 | 0 | 0 | 1 | 8 | 10999  | 11037  | - |
| YHL048C-A   | 1 | 0 | 0 | 0 | 8 | 5662   | 5796   | - |
| smorf116657 | 0 | 0 | 0 | 1 | 9 | 22741  | 22818  | + |
| smorf116696 | 0 | 0 | 0 | 1 | 9 | 35152  | 35202  | + |
| smorf116838 | 0 | 0 | 0 | 1 | 9 | 88921  | 88965  | + |
| smorf116878 | 0 | 0 | 0 | 1 | 9 | 100075 | 100119 | + |
| smorf116967 | 0 | 0 | 0 | 1 | 9 | 136696 | 136734 | + |
| smorf116971 | 0 | 0 | 0 | 1 | 9 | 137896 | 137943 | + |

|             |   |   |   |   |   |        |        |   |
|-------------|---|---|---|---|---|--------|--------|---|
| YIL115W-A   | 1 | 0 | 1 | 0 | 9 | 144265 | 144636 | + |
| smorf117113 | 0 | 0 | 0 | 1 | 9 | 173965 | 174027 | + |
| YIL100W     | 1 | 0 | 1 | 0 | 9 | 177370 | 177723 | + |
| smorf117193 | 0 | 0 | 0 | 1 | 9 | 199567 | 199659 | + |
| smorf117261 | 0 | 0 | 0 | 1 | 9 | 220966 | 221073 | + |
| YIL071W-A   | 1 | 1 | 1 | 0 | 9 | 228547 | 229023 | + |
| smorf117394 | 0 | 0 | 0 | 1 | 9 | 257455 | 257496 | + |
| YIL030W-A   | 1 | 0 | 1 | 0 | 9 | 295564 | 295902 | + |
| YIL029W-A   | 3 | 0 | 1 | 0 | 9 | 299734 | 300105 | + |
| smorf117555 | 0 | 0 | 0 | 1 | 9 | 301606 | 301680 | + |
| YIL028W     | 3 | 0 | 1 | 0 | 9 | 302098 | 302496 | + |
| smorf117679 | 0 | 0 | 0 | 1 | 9 | 338947 | 339033 | + |
| smorf117865 | 0 | 0 | 0 | 1 | 9 | 394699 | 394737 | + |
| YIR036W-A   | 1 | 0 | 1 | 0 | 9 | 422632 | 423033 | + |
| YIL171W-A   | 2 | 0 | 1 | 0 | 9 | 18260  | 18712  | + |
| smorf118678 | 0 | 0 | 0 | 1 | 9 | 173933 | 173968 | + |
| YIL089W     | 4 | 0 | 1 | 0 | 9 | 195596 | 196213 | + |
| smorf118917 | 0 | 0 | 0 | 1 | 9 | 230177 | 230227 | + |
| YIL058W     | 3 | 0 | 0 | 0 | 9 | 246911 | 247195 | + |
| smorf119115 | 0 | 0 | 0 | 1 | 9 | 289295 | 289345 | + |
| smorf119262 | 0 | 0 | 0 | 1 | 9 | 329378 | 329410 | + |
| smorf119360 | 0 | 0 | 0 | 1 | 9 | 357269 | 357310 | + |
| smorf119734 | 0 | 0 | 0 | 1 | 9 | 23823  | 23876  | + |
| smorf119777 | 0 | 0 | 0 | 1 | 9 | 31092  | 31139  | + |
| smorf119808 | 0 | 0 | 0 | 1 | 9 | 36114  | 36158  | + |
| YIL156W-A   | 4 | 0 | 1 | 0 | 9 | 47292  | 47693  | + |
| YIL141W     | 4 | 0 | 1 | 0 | 9 | 85053  | 85442  | + |
| YIL092W     | 4 | 1 | 1 | 0 | 9 | 189063 | 190964 | + |
| YIL068W-A   | 1 | 0 | 1 | 0 | 9 | 233010 | 233393 | + |
| YIL066W-A   | 1 | 0 | 1 | 0 | 9 | 237363 | 237806 | + |
| smorf120578 | 0 | 0 | 0 | 1 | 9 | 247617 | 247664 | + |
| YIL054W     | 4 | 0 | 1 | 0 | 9 | 254541 | 254858 | + |
| smorf120787 | 0 | 0 | 0 | 1 | 9 | 304389 | 304478 | + |
| smorf120884 | 0 | 0 | 0 | 1 | 9 | 330951 | 330995 | + |
| YIL012W     | 4 | 0 | 1 | 0 | 9 | 333009 | 333401 | + |
| smorf120914 | 0 | 0 | 0 | 1 | 9 | 337368 | 337418 | + |
| smorf121055 | 0 | 0 | 0 | 1 | 9 | 380895 | 380957 | + |
| YIR020W-A   | 4 | 0 | 0 | 0 | 9 | 394914 | 395156 | + |
| YIR021W-A   | 3 | 0 | 0 | 0 | 9 | 398511 | 398723 | + |
| YIR030W-A   | 2 | 0 | 1 | 0 | 9 | 412896 | 413279 | + |
| smorf121270 | 0 | 0 | 0 | 1 | 9 | 436116 | 436148 | + |
| YIR040C     | 4 | 0 | 1 | 0 | 9 | 433385 | 433717 | - |
| smorf121346 | 0 | 0 | 0 | 1 | 9 | 427286 | 427333 | - |
| smorf121439 | 0 | 0 | 0 | 1 | 9 | 399455 | 399547 | - |
| smorf121660 | 0 | 0 | 0 | 1 | 9 | 336992 | 337081 | - |
| smorf122052 | 0 | 0 | 0 | 1 | 9 | 216374 | 216406 | - |
| YIL086C     | 3 | 0 | 1 | 0 | 9 | 200150 | 200458 | - |
| smorf122142 | 0 | 0 | 0 | 1 | 9 | 196193 | 196255 | - |
| smorf122283 | 0 | 0 | 0 | 1 | 9 | 151262 | 151297 | - |
| smorf122623 | 0 | 0 | 0 | 1 | 9 | 51524  | 51571  | - |
| YIL163C     | 4 | 0 | 1 | 0 | 9 | 36899  | 37252  | - |
| smorf122693 | 0 | 0 | 0 | 1 | 9 | 28628  | 28672  | - |
| smorf122921 | 0 | 0 | 0 | 1 | 9 | 407902 | 407943 | - |
| YIR020C     | 3 | 0 | 1 | 0 | 9 | 394252 | 394554 | - |
| YIL014C-A   | 4 | 0 | 1 | 1 | 9 | 325210 | 325524 | - |
| smorf123208 | 0 | 0 | 0 | 1 | 9 | 321775 | 321885 | - |
| YIL020C-A   | 2 | 0 | 1 | 0 | 9 | 313711 | 314049 | - |
| smorf123421 | 0 | 0 | 0 | 1 | 9 | 261652 | 261687 | - |
| smorf123463 | 0 | 0 | 0 | 1 | 9 | 248593 | 248637 | - |
| YIL059C     | 3 | 0 | 1 | 1 | 9 | 246547 | 246912 | - |
| smorf124022 | 0 | 0 | 0 | 1 | 9 | 84406  | 84456  | - |
| smorf124209 | 0 | 0 | 0 | 1 | 9 | 35836  | 35880  | - |
| smorf124416 | 0 | 0 | 0 | 1 | 9 | 414723 | 414773 | - |
| YIR020C-B   | 1 | 0 | 1 | 0 | 9 | 397212 | 397946 | - |
| smorf124532 | 0 | 0 | 0 | 1 | 9 | 379863 | 379904 | - |
| YIL025C     | 3 | 0 | 1 | 0 | 9 | 308199 | 308573 | - |
| YIL032C     | 2 | 0 | 1 | 0 | 9 | 291960 | 292316 | - |
| smorf125126 | 0 | 0 | 0 | 1 | 9 | 197379 | 197411 | - |
| YIL102C     | 4 | 0 | 1 | 0 | 9 | 174579 | 174884 | - |
| smorf125320 | 0 | 0 | 0 | 1 | 9 | 142359 | 142403 | - |
| YIL134C-A   | 2 | 0 | 0 | 0 | 9 | 96522  | 96725  | - |
| smorf125470 | 0 | 0 | 0 | 1 | 9 | 93213  | 93362  | - |
| YIL142C-A   | 2 | 0 | 1 | 0 | 9 | 83208  | 83540  | - |

|             |   |   |   |   |    |        |        |   |
|-------------|---|---|---|---|----|--------|--------|---|
| smorf125534 | 0 | 1 | 0 | 1 | 9  | 69636  | 69725  | - |
| YJL222W-B   | 4 | 0 | 0 | 0 | 10 | 9346   | 9483   | + |
| smorf125976 | 0 | 0 | 0 | 1 | 10 | 47842  | 47874  | + |
| smorf126009 | 0 | 1 | 0 | 1 | 10 | 59371  | 59451  | + |
| smorf126246 | 0 | 0 | 0 | 1 | 10 | 111253 | 111285 | + |
| smorf126250 | 0 | 0 | 0 | 1 | 10 | 111706 | 111753 | + |
| smorf126289 | 0 | 0 | 0 | 1 | 10 | 123859 | 123936 | + |
| YJL136W-A   | 2 | 0 | 0 | 0 | 10 | 156166 | 156249 | + |
| YJL118W     | 4 | 0 | 1 | 0 | 10 | 191638 | 192297 | + |
| smorf126666 | 0 | 0 | 0 | 1 | 10 | 220603 | 220695 | + |
| smorf126693 | 0 | 0 | 0 | 1 | 10 | 228976 | 229017 | + |
| smorf126883 | 0 | 0 | 0 | 1 | 10 | 278020 | 278061 | + |
| YJL037W     | 4 | 0 | 1 | 0 | 10 | 376657 | 377331 | + |
| YJL028W     | 2 | 0 | 1 | 0 | 10 | 391306 | 391641 | + |
| smorf127418 | 0 | 1 | 0 | 1 | 10 | 458479 | 458526 | + |
| YJR037W     | 2 | 0 | 1 | 0 | 10 | 503095 | 503478 | + |
| smorf127615 | 0 | 0 | 0 | 1 | 10 | 517990 | 518034 | + |
| smorf127640 | 0 | 0 | 0 | 1 | 10 | 525685 | 525744 | + |
| smorf127837 | 0 | 1 | 0 | 1 | 10 | 581608 | 581682 | + |
| YJR087W     | 2 | 1 | 1 | 0 | 10 | 586393 | 586743 | + |
| YJR114W     | 1 | 0 | 1 | 0 | 10 | 638653 | 639045 | + |
| smorf128090 | 0 | 0 | 0 | 1 | 10 | 651301 | 651345 | + |
| YJR146W     | 4 | 0 | 1 | 0 | 10 | 703879 | 704232 | + |
| smorf128370 | 0 | 0 | 0 | 1 | 10 | 712081 | 712125 | + |
| YJR151W-A   | 1 | 0 | 0 | 0 | 10 | 717574 | 717624 | + |
| YJL222W-A   | 4 | 0 | 0 | 0 | 10 | 9452   | 9679   | + |
| smorf128767 | 0 | 0 | 0 | 1 | 10 | 59039  | 59086  | + |
| smorf128970 | 0 | 0 | 0 | 1 | 10 | 117947 | 117991 | + |
| YJL150W     | 4 | 0 | 1 | 0 | 10 | 137120 | 137422 | + |
| smorf129102 | 0 | 0 | 0 | 1 | 10 | 153221 | 153253 | + |
| smorf129115 | 0 | 0 | 0 | 1 | 10 | 156395 | 156445 | + |
| YJL135W     | 3 | 0 | 1 | 0 | 10 | 157874 | 158191 | + |
| smorf129198 | 0 | 0 | 0 | 1 | 10 | 173483 | 173533 | + |
| smorf129212 | 0 | 0 | 0 | 1 | 10 | 177938 | 177991 | + |
| YJL127W-A   | 4 | 0 | 0 | 0 | 10 | 180191 | 180307 | + |
| YJL120W     | 2 | 0 | 1 | 0 | 10 | 191021 | 191344 | + |
| smorf129362 | 0 | 0 | 0 | 1 | 10 | 211907 | 211951 | + |
| smorf129418 | 0 | 0 | 0 | 1 | 10 | 223724 | 223765 | + |
| YJL009W     | 4 | 0 | 1 | 0 | 10 | 419849 | 420175 | + |
| YJR071W     | 4 | 0 | 1 | 0 | 10 | 570398 | 570766 | + |
| smorf130701 | 0 | 0 | 0 | 1 | 10 | 585677 | 585751 | + |
| smorf130814 | 0 | 0 | 0 | 1 | 10 | 613244 | 613282 | + |
| YJR108W     | 4 | 0 | 1 | 0 | 10 | 628706 | 629077 | + |
| YJR120W     | 4 | 0 | 1 | 0 | 10 | 647120 | 647470 | + |
| YJR128W     | 3 | 0 | 1 | 0 | 10 | 662915 | 663274 | + |
| smorf131166 | 0 | 0 | 0 | 1 | 10 | 722720 | 722752 | + |
| YJL220W     | 2 | 0 | 1 | 0 | 10 | 18243  | 18695  | + |
| YJL217W     | 4 | 0 | 1 | 1 | 10 | 23133  | 23729  | + |
| smorf131352 | 0 | 0 | 0 | 1 | 10 | 31833  | 31901  | + |
| smorf131424 | 0 | 0 | 0 | 1 | 10 | 50313  | 50354  | + |
| YJL169W     | 3 | 0 | 1 | 0 | 10 | 102093 | 102461 | + |
| YJL156W-A   | 4 | 0 | 0 | 0 | 10 | 126600 | 126821 | + |
| smorf131931 | 0 | 0 | 0 | 1 | 10 | 195084 | 195116 | + |
| smorf132156 | 0 | 0 | 0 | 1 | 10 | 254280 | 254318 | + |
| smorf132290 | 0 | 0 | 0 | 1 | 10 | 289554 | 289616 | + |
| smorf132310 | 0 | 0 | 0 | 1 | 10 | 293244 | 293282 | + |
| YJL077W-B   | 3 | 0 | 0 | 0 | 10 | 294042 | 294140 | + |
| smorf132517 | 0 | 0 | 0 | 1 | 10 | 348570 | 348620 | + |
| smorf132673 | 0 | 0 | 0 | 1 | 10 | 398589 | 398633 | + |
| smorf132878 | 0 | 0 | 0 | 1 | 10 | 455388 | 455453 | + |
| smorf132893 | 0 | 0 | 0 | 1 | 10 | 459615 | 459659 | + |
| YJR018W     | 2 | 1 | 1 | 0 | 10 | 466779 | 467141 | + |
| YJR020W     | 1 | 0 | 1 | 0 | 10 | 467994 | 468326 | + |
| smorf133505 | 0 | 0 | 0 | 1 | 10 | 606855 | 606980 | + |
| smorf133676 | 0 | 0 | 0 | 1 | 10 | 654423 | 654455 | + |
| smorf133911 | 0 | 0 | 0 | 1 | 10 | 719379 | 719456 | + |
| YJR157W     | 1 | 0 | 1 | 0 | 10 | 730509 | 730871 | + |
| smorf134124 | 0 | 0 | 0 | 1 | 10 | 717900 | 717941 | - |
| smorf134357 | 0 | 0 | 0 | 1 | 10 | 651144 | 651257 | - |
| smorf134396 | 0 | 0 | 0 | 1 | 10 | 639675 | 639725 | - |
| smorf134431 | 0 | 0 | 0 | 1 | 10 | 627441 | 627488 | - |
| smorf134479 | 0 | 0 | 0 | 1 | 10 | 611532 | 611582 | - |
| YJR038C     | 3 | 0 | 1 | 0 | 10 | 503703 | 504065 | - |

|             |   |   |   |   |    |        |        |   |
|-------------|---|---|---|---|----|--------|--------|---|
| YJR023C     | 1 | 0 | 1 | 0 | 10 | 469797 | 470198 | - |
| smorf135214 | 0 | 0 | 0 | 1 | 10 | 417123 | 417230 | - |
| smorf135428 | 0 | 0 | 0 | 1 | 10 | 360873 | 360920 | - |
| YJL075C     | 2 | 0 | 1 | 0 | 10 | 298455 | 298871 | - |
| YJL119C     | 4 | 0 | 1 | 0 | 10 | 191571 | 191894 | - |
| smorf136142 | 0 | 0 | 0 | 1 | 10 | 173163 | 173213 | - |
| YJL142C     | 2 | 0 | 1 | 0 | 10 | 147816 | 148208 | - |
| smorf136226 | 0 | 0 | 0 | 1 | 10 | 144870 | 144944 | - |
| smorf136362 | 0 | 0 | 0 | 1 | 10 | 117627 | 117674 | - |
| smorf136366 | 0 | 0 | 0 | 1 | 10 | 116964 | 117047 | - |
| smorf136561 | 0 | 0 | 0 | 1 | 10 | 70875  | 70934  | - |
| YJL195C     | 2 | 1 | 1 | 0 | 10 | 69240  | 69941  | - |
| smorf136592 | 0 | 0 | 0 | 1 | 10 | 59490  | 59543  | - |
| YJL202C     | 3 | 1 | 1 | 0 | 10 | 53943  | 54290  | - |
| smorf136749 | 0 | 0 | 0 | 1 | 10 | 27216  | 27275  | - |
| YJL215C     | 3 | 0 | 1 | 0 | 10 | 26412  | 26771  | - |
| YJR162C     | 4 | 1 | 1 | 0 | 10 | 744905 | 745255 | - |
| smorf136928 | 0 | 0 | 0 | 1 | 10 | 725252 | 725347 | - |
| smorf136957 | 0 | 0 | 0 | 1 | 10 | 717461 | 717520 | - |
| smorf137941 | 0 | 0 | 0 | 1 | 10 | 472409 | 472450 | - |
| YJL038C     | 4 | 0 | 1 | 0 | 10 | 375110 | 375769 | - |
| smorf138514 | 0 | 0 | 0 | 1 | 10 | 319583 | 319654 | - |
| smorf138523 | 0 | 0 | 0 | 1 | 10 | 317171 | 317248 | - |
| smorf138524 | 0 | 0 | 0 | 1 | 10 | 317057 | 317122 | - |
| smorf138936 | 0 | 0 | 0 | 1 | 10 | 196067 | 196099 | - |
| YJL182C     | 2 | 0 | 1 | 0 | 10 | 85433  | 85750  | - |
| smorf139460 | 0 | 0 | 0 | 1 | 10 | 28118  | 28156  | - |
| smorf139664 | 0 | 0 | 0 | 1 | 10 | 723280 | 723336 | - |
| smorf139733 | 0 | 0 | 0 | 1 | 10 | 696946 | 697020 | - |
| smorf140027 | 0 | 0 | 0 | 1 | 10 | 618013 | 618045 | - |
| smorf140045 | 0 | 0 | 0 | 1 | 10 | 611962 | 612078 | - |
| smorf140278 | 0 | 0 | 0 | 1 | 10 | 543715 | 543825 | - |
| smorf140287 | 0 | 0 | 0 | 1 | 10 | 540367 | 540405 | - |
| smorf140598 | 0 | 0 | 0 | 1 | 10 | 455890 | 455937 | - |
| YJL015C     | 3 | 0 | 1 | 0 | 10 | 407137 | 407511 | - |
| YJL027C     | 4 | 1 | 1 | 0 | 10 | 391828 | 392244 | - |
| smorf141010 | 0 | 0 | 0 | 1 | 10 | 339316 | 339360 | - |
| YJL077C     | 3 | 0 | 1 | 0 | 10 | 294661 | 295056 | - |
| YJL086C     | 3 | 0 | 1 | 0 | 10 | 272473 | 272841 | - |
| smorf141195 | 0 | 0 | 0 | 1 | 10 | 268729 | 268773 | - |
| smorf141595 | 0 | 0 | 0 | 1 | 10 | 151036 | 151077 | - |
| smorf141904 | 0 | 0 | 0 | 1 | 10 | 60673  | 60753  | - |
| YJL211C     | 2 | 0 | 1 | 0 | 10 | 36757  | 37200  | - |
| smorf142162 | 0 | 0 | 0 | 1 | 11 | 14014  | 14139  | + |
| smorf142177 | 0 | 0 | 0 | 1 | 11 | 19060  | 19119  | + |
| YKL177W     | 1 | 0 | 1 | 0 | 11 | 114361 | 114699 | + |
| smorf142567 | 0 | 0 | 0 | 1 | 11 | 137254 | 137364 | + |
| YKL136W     | 1 | 0 | 1 | 0 | 11 | 186421 | 186819 | + |
| YKL123W     | 2 | 0 | 1 | 1 | 11 | 211687 | 212067 | + |
| YKL118W     | 2 | 1 | 1 | 0 | 11 | 218770 | 219081 | + |
| smorf143248 | 0 | 0 | 0 | 1 | 11 | 334726 | 334770 | + |
| YKL044W     | 4 | 0 | 1 | 0 | 11 | 355966 | 356286 | + |
| YKL031W     | 4 | 0 | 1 | 0 | 11 | 381715 | 382128 | + |
| YKL030W     | 1 | 0 | 1 | 0 | 11 | 382141 | 382746 | + |
| YKL023W     | 4 | 0 | 1 | 1 | 11 | 393364 | 394197 | + |
| smorf143585 | 0 | 0 | 0 | 1 | 11 | 430582 | 430626 | + |
| smorf143887 | 0 | 0 | 0 | 1 | 11 | 511297 | 511350 | + |
| YKR041W     | 4 | 0 | 1 | 0 | 11 | 517840 | 518592 | + |
| smorf143955 | 0 | 0 | 0 | 1 | 11 | 533608 | 533682 | + |
| smorf144088 | 0 | 0 | 0 | 1 | 11 | 578179 | 578232 | + |
| smorf144328 | 0 | 0 | 0 | 1 | 11 | 642637 | 642669 | + |
| YKL225W     | 4 | 0 | 1 | 0 | 11 | 452    | 799    | + |
| YKL223W     | 4 | 0 | 1 | 0 | 11 | 2390   | 2722   | + |
| smorf144654 | 0 | 0 | 0 | 1 | 11 | 66560  | 66604  | + |
| smorf144667 | 0 | 0 | 0 | 1 | 11 | 70325  | 70372  | + |
| smorf145019 | 0 | 0 | 0 | 1 | 11 | 165677 | 165712 | + |
| smorf145038 | 0 | 0 | 0 | 1 | 11 | 169064 | 169099 | + |
| YKL131W     | 1 | 0 | 1 | 0 | 11 | 194477 | 194998 | + |
| smorf145186 | 0 | 0 | 0 | 1 | 11 | 212579 | 212614 | + |
| smorf145551 | 0 | 0 | 0 | 1 | 11 | 304169 | 304216 | + |
| smorf145635 | 0 | 0 | 0 | 1 | 11 | 333947 | 333985 | + |
| smorf145676 | 0 | 0 | 0 | 1 | 11 | 346646 | 346687 | + |
| YKL037W     | 4 | 0 | 1 | 0 | 11 | 369008 | 369364 | + |

|             |   |   |   |   |    |        |        |   |
|-------------|---|---|---|---|----|--------|--------|---|
| smorf146129 | 0 | 0 | 0 | 1 | 11 | 466085 | 466153 | + |
| YKR032W     | 4 | 0 | 1 | 0 | 11 | 506159 | 506473 | + |
| smorf146521 | 0 | 0 | 0 | 1 | 11 | 575900 | 575950 | + |
| smorf146617 | 0 | 0 | 0 | 1 | 11 | 603629 | 603664 | + |
| smorf146751 | 0 | 0 | 0 | 1 | 11 | 638051 | 638113 | + |
| smorf146757 | 0 | 0 | 0 | 1 | 11 | 639845 | 639898 | + |
| smorf146770 | 0 | 0 | 0 | 1 | 11 | 644831 | 644899 | + |
| smorf146940 | 0 | 0 | 0 | 1 | 11 | 19704  | 19745  | + |
| smorf146951 | 0 | 0 | 0 | 1 | 11 | 22023  | 22103  | + |
| YKL202W     | 2 | 0 | 1 | 0 | 11 | 63822  | 64403  | + |
| smorf147166 | 0 | 0 | 0 | 1 | 11 | 74061  | 74159  | + |
| smorf147412 | 0 | 0 | 0 | 1 | 11 | 137379 | 137420 | + |
| YKL153W     | 1 | 0 | 1 | 0 | 11 | 163605 | 164114 | + |
| smorf147511 | 0 | 0 | 0 | 1 | 11 | 165507 | 165551 | + |
| smorf147651 | 0 | 0 | 0 | 1 | 11 | 195207 | 195242 | + |
| smorf147977 | 0 | 0 | 0 | 1 | 11 | 304530 | 304595 | + |
| YKL066W     | 2 | 0 | 1 | 0 | 11 | 314925 | 315368 | + |
| YKL053W     | 1 | 0 | 1 | 0 | 11 | 339216 | 339590 | + |
| smorf148380 | 0 | 0 | 0 | 1 | 11 | 428571 | 428636 | + |
| smorf148504 | 0 | 0 | 0 | 1 | 11 | 461235 | 461321 | + |
| smorf148702 | 0 | 0 | 0 | 1 | 11 | 513795 | 513842 | + |
| smorf148873 | 0 | 0 | 0 | 1 | 11 | 565518 | 565571 | + |
| smorf149177 | 0 | 0 | 0 | 1 | 11 | 650268 | 650339 | + |
| smorf149486 | 0 | 0 | 0 | 1 | 11 | 610775 | 610867 | - |
| smorf149597 | 0 | 0 | 0 | 1 | 11 | 584360 | 584392 | - |
| YKR073C     | 4 | 0 | 1 | 0 | 11 | 577829 | 578149 | - |
| smorf149797 | 0 | 0 | 0 | 1 | 11 | 517001 | 517135 | - |
| YKR012C     | 4 | 0 | 1 | 0 | 11 | 463382 | 463759 | - |
| YKL023C-A   | 4 | 1 | 0 | 1 | 11 | 392789 | 393016 | - |
| smorf150357 | 0 | 0 | 0 | 1 | 11 | 354806 | 354925 | - |
| smorf150362 | 0 | 0 | 0 | 1 | 11 | 353615 | 353659 | - |
| smorf150404 | 0 | 0 | 0 | 1 | 11 | 342071 | 342127 | - |
| smorf150405 | 0 | 0 | 0 | 1 | 11 | 341591 | 341782 | - |
| smorf150492 | 0 | 0 | 0 | 1 | 11 | 315314 | 315373 | - |
| smorf150510 | 0 | 0 | 0 | 1 | 11 | 308765 | 308806 | - |
| YKL102C     | 3 | 0 | 1 | 0 | 11 | 247706 | 248011 | - |
| smorf150819 | 0 | 0 | 0 | 1 | 11 | 216215 | 216280 | - |
| smorf150961 | 0 | 0 | 0 | 1 | 11 | 179387 | 179479 | - |
| smorf151134 | 0 | 0 | 0 | 1 | 11 | 137492 | 137566 | - |
| smorf151551 | 0 | 0 | 0 | 1 | 11 | 12485  | 12523  | - |
| smorf151651 | 0 | 0 | 0 | 1 | 11 | 652219 | 652251 | - |
| YKR040C     | 1 | 0 | 1 | 0 | 11 | 517705 | 518208 | - |
| smorf152192 | 0 | 0 | 0 | 1 | 11 | 513430 | 513546 | - |
| smorf152711 | 0 | 0 | 0 | 1 | 11 | 369118 | 369168 | - |
| smorf153053 | 0 | 0 | 0 | 1 | 11 | 265102 | 265134 | - |
| smorf153056 | 0 | 0 | 0 | 1 | 11 | 264184 | 264234 | - |
| YKL106C-A   | 4 | 0 | 0 | 0 | 11 | 236791 | 236910 | - |
| smorf153283 | 0 | 0 | 0 | 1 | 11 | 204388 | 204510 | - |
| YKL147C     | 2 | 0 | 1 | 0 | 11 | 171556 | 172173 | - |
| smorf153405 | 0 | 0 | 0 | 1 | 11 | 166597 | 166656 | - |
| smorf153482 | 0 | 0 | 0 | 1 | 11 | 152866 | 152922 | - |
| smorf153486 | 0 | 0 | 0 | 1 | 11 | 151756 | 151791 | - |
| smorf153545 | 0 | 0 | 0 | 1 | 11 | 130261 | 130305 | - |
| smorf153918 | 0 | 0 | 0 | 1 | 11 | 24784  | 24849  | - |
| smorf154221 | 0 | 0 | 0 | 1 | 11 | 617187 | 617225 | - |
| smorf154766 | 0 | 0 | 0 | 1 | 11 | 463044 | 463118 | - |
| YKL036C     | 3 | 0 | 1 | 0 | 11 | 369171 | 369563 | - |
| smorf155268 | 0 | 0 | 0 | 1 | 11 | 321678 | 321716 | - |
| YKL076C     | 3 | 0 | 1 | 1 | 11 | 292482 | 292865 | - |
| smorf155486 | 0 | 0 | 0 | 1 | 11 | 271245 | 271337 | - |
| YKL096C-B   | 1 | 0 | 0 | 0 | 11 | 258717 | 258866 | - |
| YKL097C     | 4 | 0 | 1 | 0 | 11 | 258147 | 258557 | - |
| smorf155655 | 0 | 0 | 0 | 1 | 11 | 231828 | 231872 | - |
| YKL115C     | 4 | 0 | 1 | 0 | 11 | 222537 | 222929 | - |
| smorf155986 | 0 | 0 | 0 | 1 | 11 | 137472 | 137519 | - |
| YKL165C-A   | 4 | 0 | 0 | 0 | 11 | 135795 | 136028 | - |
| YKL183C-A   | 2 | 1 | 0 | 0 | 11 | 98400  | 98612  | - |
| smorf156336 | 0 | 0 | 0 | 1 | 11 | 53427  | 53465  | - |
| smorf156497 | 0 | 0 | 0 | 1 | 11 | 14085  | 14126  | - |
| smorf156510 | 0 | 0 | 0 | 1 | 11 | 11883  | 11915  | - |
| smorf156527 | 0 | 0 | 0 | 1 | 11 | 6372   | 6425   | - |
| smorf156874 | 0 | 0 | 0 | 1 | 12 | 94321  | 94413  | + |
| smorf156957 | 0 | 0 | 0 | 1 | 12 | 130828 | 130890 | + |

|             |   |   |   |   |    |         |         |   |
|-------------|---|---|---|---|----|---------|---------|---|
| smorf157004 | 0 | 0 | 0 | 1 | 12 | 151156  | 151206  | + |
| YLR041W     | 2 | 0 | 1 | 0 | 12 | 229378  | 229698  | + |
| YLR112W     | 4 | 0 | 1 | 1 | 12 | 370792  | 371211  | + |
| YLR140W     | 3 | 0 | 1 | 0 | 12 | 423475  | 423801  | + |
| smorf158022 | 0 | 1 | 0 | 1 | 12 | 449737  | 449784  | + |
| YLR156W     | 1 | 0 | 1 | 0 | 12 | 472114  | 472458  | + |
| YLR157W-D   | 1 | 0 | 0 | 0 | 12 | 475765  | 475977  | + |
| YLR161W     | 1 | 0 | 1 | 0 | 12 | 488998  | 489342  | + |
| YLR230W     | 2 | 0 | 1 | 0 | 12 | 604576  | 604881  | + |
| YLR232W     | 1 | 1 | 1 | 0 | 12 | 606832  | 607179  | + |
| YLR252W     | 2 | 0 | 1 | 0 | 12 | 641959  | 642264  | + |
| smorf158762 | 0 | 0 | 0 | 1 | 12 | 669211  | 669315  | + |
| smorf158864 | 0 | 1 | 0 | 1 | 12 | 699886  | 699993  | + |
| YLR279W     | 3 | 0 | 1 | 0 | 12 | 704311  | 704700  | + |
| YLR296W     | 4 | 0 | 1 | 0 | 12 | 722980  | 723306  | + |
| YLR322W     | 1 | 0 | 1 | 0 | 12 | 777628  | 777942  | + |
| YLR338W     | 2 | 0 | 1 | 0 | 12 | 804346  | 805203  | + |
| YLR400W     | 2 | 0 | 1 | 0 | 12 | 922063  | 922536  | + |
| smorf159701 | 0 | 0 | 0 | 1 | 12 | 927889  | 927927  | + |
| YLL065W     | 4 | 0 | 1 | 0 | 12 | 11726   | 12076   | + |
| smorf160374 | 0 | 0 | 0 | 1 | 12 | 29666   | 29740   | + |
| smorf160386 | 0 | 0 | 0 | 1 | 12 | 32294   | 32338   | + |
| smorf160511 | 0 | 0 | 0 | 1 | 12 | 63968   | 64039   | + |
| smorf160622 | 0 | 0 | 0 | 1 | 12 | 95348   | 95410   | + |
| YLR030W     | 4 | 0 | 1 | 0 | 12 | 203291  | 204082  | + |
| smorf161202 | 0 | 0 | 0 | 1 | 12 | 228680  | 228766  | + |
| smorf161501 | 0 | 0 | 0 | 1 | 12 | 307319  | 307351  | + |
| YLR120W-A   | 2 | 0 | 0 | 1 | 12 | 388673  | 388774  | + |
| smorf161791 | 0 | 0 | 0 | 1 | 12 | 390974  | 391009  | + |
| YLR124W     | 2 | 0 | 1 | 0 | 12 | 391601  | 391945  | + |
| YLR125W     | 4 | 0 | 1 | 0 | 12 | 393485  | 393895  | + |
| smorf161888 | 0 | 0 | 0 | 1 | 12 | 415535  | 415591  | + |
| YLR157W-E   | 1 | 0 | 0 | 0 | 12 | 481874  | 482038  | + |
| smorf162196 | 0 | 0 | 0 | 1 | 12 | 493616  | 493693  | + |
| YLR171W     | 1 | 0 | 1 | 0 | 12 | 500735  | 501124  | + |
| smorf162375 | 0 | 0 | 0 | 1 | 12 | 540770  | 540853  | + |
| YLR224W     | 4 | 0 | 1 | 1 | 12 | 586466  | 587575  | + |
| smorf162543 | 0 | 0 | 0 | 1 | 12 | 591434  | 591475  | + |
| smorf162588 | 0 | 0 | 0 | 1 | 12 | 603926  | 603991  | + |
| smorf162809 | 0 | 0 | 0 | 1 | 12 | 674309  | 674389  | + |
| smorf163032 | 0 | 0 | 0 | 1 | 12 | 738173  | 738205  | + |
| YLR342W-A   | 2 | 0 | 0 | 0 | 12 | 815810  | 815983  | + |
| smorf164095 | 0 | 0 | 0 | 1 | 12 | 1042781 | 1043044 | + |
| smorf164359 | 0 | 0 | 0 | 1 | 12 | 45864   | 45899   | + |
| YLL047W     | 1 | 0 | 1 | 0 | 12 | 46671   | 47054   | + |
| YLL037W     | 2 | 0 | 1 | 0 | 12 | 66561   | 66941   | + |
| smorf164641 | 0 | 0 | 0 | 1 | 12 | 122001  | 122147  | + |
| YLL006W-A   | 4 | 0 | 0 | 0 | 12 | 136344  | 136520  | + |
| smorf164933 | 0 | 0 | 0 | 1 | 12 | 201627  | 201707  | + |
| smorf165072 | 0 | 0 | 0 | 1 | 12 | 234864  | 234908  | + |
| smorf165136 | 0 | 0 | 0 | 1 | 12 | 251175  | 251216  | + |
| smorf165580 | 0 | 0 | 0 | 1 | 12 | 363174  | 363224  | + |
| YLR111W     | 4 | 1 | 1 | 0 | 12 | 370392  | 370724  | + |
| smorf165776 | 0 | 0 | 0 | 1 | 12 | 410334  | 410372  | + |
| YLR159W     | 1 | 0 | 1 | 0 | 12 | 485346  | 485690  | + |
| YLR169W     | 4 | 0 | 1 | 0 | 12 | 500337  | 500690  | + |
| YLR184W     | 4 | 0 | 1 | 0 | 12 | 522108  | 522455  | + |
| smorf166263 | 0 | 0 | 0 | 1 | 12 | 542307  | 542339  | + |
| smorf166903 | 0 | 0 | 0 | 1 | 12 | 713634  | 713681  | + |
| smorf166944 | 0 | 0 | 0 | 1 | 12 | 721797  | 721850  | + |
| YLR315W     | 4 | 0 | 1 | 1 | 12 | 764808  | 765269  | + |
| YLR349W     | 2 | 0 | 1 | 0 | 12 | 827520  | 828026  | + |
| YLR365W     | 2 | 0 | 1 | 0 | 12 | 855198  | 855530  | + |
| YLR366W     | 2 | 0 | 1 | 0 | 12 | 855537  | 855842  | + |
| YLR379W     | 2 | 0 | 1 | 0 | 12 | 876921  | 877295  | + |
| smorf167520 | 0 | 0 | 0 | 1 | 12 | 898077  | 898151  | + |
| smorf167566 | 0 | 0 | 0 | 1 | 12 | 910251  | 910409  | + |
| YLR402W     | 4 | 0 | 1 | 0 | 12 | 924564  | 925079  | + |
| smorf168200 | 0 | 0 | 0 | 1 | 12 | 1053108 | 1053203 | - |
| smorf168455 | 0 | 0 | 0 | 1 | 12 | 988047  | 988085  | - |
| YLR406C-A   | 4 | 0 | 0 | 0 | 12 | 932205  | 932354  | - |
| smorf168734 | 0 | 0 | 0 | 1 | 12 | 928356  | 928514  | - |
| YLR374C     | 4 | 0 | 1 | 0 | 12 | 871452  | 871841  | - |

|             |   |   |   |   |    |         |         |   |
|-------------|---|---|---|---|----|---------|---------|---|
| YLR358C     | 1 | 1 | 1 | 0 | 12 | 843486  | 844049  | - |
| smorf169048 | 0 | 0 | 0 | 1 | 12 | 840363  | 840401  | - |
| smorf169204 | 0 | 0 | 0 | 1 | 12 | 789753  | 789785  | - |
| smorf169214 | 0 | 0 | 0 | 1 | 12 | 787212  | 787340  | - |
| smorf169618 | 0 | 0 | 0 | 1 | 12 | 682452  | 682499  | - |
| YLR269C     | 4 | 1 | 1 | 0 | 12 | 680868  | 681218  | - |
| smorf169623 | 0 | 0 | 0 | 1 | 12 | 679821  | 679961  | - |
| YLR264C-A   | 4 | 0 | 0 | 0 | 12 | 673830  | 673946  | - |
| smorf169679 | 0 | 0 | 0 | 1 | 12 | 665391  | 665507  | - |
| YLR236C     | 4 | 0 | 1 | 0 | 12 | 611796  | 612119  | - |
| smorf169927 | 0 | 0 | 0 | 1 | 12 | 593007  | 593084  | - |
| smorf170285 | 0 | 1 | 0 | 1 | 12 | 498450  | 498494  | - |
| smorf170545 | 0 | 0 | 0 | 1 | 12 | 423759  | 423812  | - |
| smorf171141 | 0 | 0 | 0 | 1 | 12 | 264075  | 264125  | - |
| smorf171529 | 0 | 0 | 0 | 1 | 12 | 150936  | 150974  | - |
| YLL020C     | 1 | 0 | 1 | 1 | 12 | 105555  | 105860  | - |
| smorf171688 | 0 | 0 | 0 | 1 | 12 | 100479  | 100520  | - |
| smorf171729 | 0 | 0 | 0 | 1 | 12 | 88224   | 88262   | - |
| YLL030C     | 3 | 0 | 1 | 0 | 12 | 80355   | 80696   | - |
| YLL060C     | 4 | 1 | 1 | 0 | 12 | 21138   | 21839   | - |
| YLR453C     | 4 | 1 | 1 | 0 | 12 | 1041797 | 1042984 | - |
| smorf172231 | 0 | 1 | 0 | 1 | 12 | 1007321 | 1007353 | - |
| YLR434C     | 4 | 0 | 1 | 0 | 12 | 1006022 | 1006405 | - |
| YLR428C     | 2 | 1 | 1 | 0 | 12 | 990614  | 990958  | - |
| smorf172404 | 0 | 0 | 0 | 1 | 12 | 954986  | 955021  | - |
| YLR416C     | 3 | 0 | 1 | 0 | 12 | 954488  | 954886  | - |
| YLR412C-A   | 4 | 0 | 0 | 0 | 12 | 950264  | 950470  | - |
| smorf172631 | 0 | 0 | 0 | 1 | 12 | 898826  | 898870  | - |
| smorf172917 | 0 | 0 | 0 | 1 | 12 | 818330  | 818368  | - |
| YLR339C     | 4 | 0 | 1 | 0 | 12 | 805784  | 806335  | - |
| YLR294C     | 4 | 0 | 1 | 1 | 12 | 721703  | 722032  | - |
| YLR285C-A   | 2 | 0 | 0 | 1 | 12 | 708170  | 708340  | - |
| YLR265C     | 4 | 0 | 1 | 1 | 12 | 674429  | 675457  | - |
| YLR255C     | 2 | 0 | 1 | 0 | 12 | 645602  | 645955  | - |
| smorf173556 | 0 | 1 | 0 | 1 | 12 | 636113  | 636178  | - |
| YLR222C-A   | 4 | 0 | 0 | 0 | 12 | 582008  | 582238  | - |
| smorf173983 | 0 | 0 | 0 | 1 | 12 | 527960  | 528013  | - |
| YLR154C     | 4 | 0 | 1 | 1 | 12 | 447983  | 448315  | - |
| YLR123C     | 2 | 0 | 1 | 0 | 12 | 391079  | 391408  | - |
| smorf174572 | 0 | 0 | 0 | 1 | 12 | 348899  | 348946  | - |
| YLR036C     | 4 | 0 | 1 | 1 | 12 | 221522  | 222133  | - |
| smorf175588 | 0 | 0 | 0 | 1 | 12 | 52589   | 52651   | - |
| smorf175670 | 0 | 0 | 0 | 1 | 12 | 23024   | 23068   | - |
| YLR466C-B   | 1 | 0 | 0 | 0 | 12 | 1071592 | 1071708 | - |
| smorf175961 | 0 | 0 | 0 | 1 | 12 | 1025827 | 1025895 | - |
| YLR437C-A   | 2 | 0 | 0 | 0 | 12 | 1012456 | 1012683 | - |
| smorf176035 | 0 | 0 | 0 | 1 | 12 | 1011325 | 1011390 | - |
| YLR415C     | 4 | 0 | 1 | 0 | 12 | 954256  | 954594  | - |
| smorf176222 | 0 | 0 | 0 | 1 | 12 | 949435  | 949470  | - |
| YLR361C-A   | 4 | 1 | 0 | 1 | 12 | 849382  | 849678  | - |
| smorf176667 | 0 | 0 | 0 | 1 | 12 | 832894  | 832947  | - |
| smorf176856 | 0 | 0 | 0 | 1 | 12 | 786835  | 786867  | - |
| smorf176871 | 0 | 0 | 0 | 1 | 12 | 781837  | 781875  | - |
| YLR311C     | 3 | 0 | 1 | 0 | 12 | 757267  | 757614  | - |
| YLR302C     | 4 | 0 | 1 | 0 | 12 | 732193  | 732555  | - |
| YLR282C     | 2 | 1 | 1 | 0 | 12 | 705073  | 705414  | - |
| smorf177115 | 0 | 0 | 0 | 1 | 12 | 704437  | 704478  | - |
| smorf177289 | 0 | 0 | 0 | 1 | 12 | 660100  | 660138  | - |
| smorf177356 | 0 | 0 | 0 | 1 | 12 | 642265  | 642306  | - |
| smorf177473 | 0 | 0 | 0 | 1 | 12 | 614446  | 614532  | - |
| smorf177926 | 0 | 0 | 0 | 1 | 12 | 493888  | 493935  | - |
| YLR149C-A   | 4 | 0 | 0 | 0 | 12 | 440371  | 440457  | - |
| YLR122C     | 2 | 0 | 1 | 0 | 12 | 390955  | 391332  | - |
| smorf178755 | 0 | 0 | 0 | 1 | 12 | 283648  | 283680  | - |
| YLR053C     | 4 | 0 | 1 | 1 | 12 | 248101  | 248427  | - |
| smorf179152 | 0 | 0 | 0 | 1 | 12 | 172069  | 172101  | - |
| smorf179327 | 0 | 0 | 0 | 1 | 12 | 124924  | 125007  | - |
| YLL022C     | 4 | 0 | 1 | 1 | 12 | 99043   | 100200  | - |
| smorf179575 | 0 | 0 | 0 | 1 | 12 | 40906   | 40944   | - |
| YLL059C     | 2 | 0 | 1 | 0 | 12 | 22474   | 22980   | - |
| YML100W-A   | 3 | 0 | 0 | 0 | 13 | 70138   | 70311   | + |
| smorf180020 | 0 | 0 | 0 | 1 | 13 | 97759   | 97815   | + |
| smorf180091 | 0 | 0 | 0 | 1 | 13 | 115681  | 115731  | + |

|             |   |   |   |   |    |        |        |   |
|-------------|---|---|---|---|----|--------|--------|---|
| smorf180218 | 0 | 0 | 0 | 1 | 13 | 148888 | 148932 | + |
| smorf180285 | 0 | 0 | 0 | 1 | 13 | 167680 | 167718 | + |
| YML047W-A   | 3 | 0 | 1 | 0 | 13 | 179893 | 180258 | + |
| smorf180686 | 0 | 0 | 0 | 1 | 13 | 262849 | 262962 | + |
| smorf180766 | 0 | 0 | 0 | 1 | 13 | 283258 | 283338 | + |
| smorf180876 | 0 | 0 | 0 | 1 | 13 | 320659 | 320775 | + |
| YMR031W-A   | 4 | 0 | 1 | 0 | 13 | 334708 | 335034 | + |
| YMR030W-A   | 4 | 0 | 0 | 0 | 13 | 337312 | 337602 | + |
| smorf181183 | 0 | 0 | 0 | 1 | 13 | 405937 | 405990 | + |
| smorf181277 | 0 | 0 | 0 | 1 | 13 | 436375 | 436455 | + |
| YMR105W-A   | 3 | 0 | 0 | 0 | 13 | 478063 | 478257 | + |
| smorf181505 | 0 | 0 | 0 | 1 | 13 | 502246 | 502341 | + |
| smorf181507 | 0 | 1 | 0 | 1 | 13 | 503092 | 503136 | + |
| smorf181510 | 0 | 0 | 0 | 1 | 13 | 503740 | 503790 | + |
| YMR119W-A   | 1 | 0 | 1 | 1 | 13 | 506995 | 507369 | + |
| smorf181610 | 0 | 0 | 0 | 1 | 13 | 522298 | 522360 | + |
| YMR173W-A   | 1 | 0 | 1 | 1 | 13 | 608896 | 610080 | + |
| YMR182W-A   | 2 | 0 | 0 | 0 | 13 | 625810 | 625896 | + |
| YMR230W-A   | 2 | 0 | 0 | 0 | 13 | 733267 | 733455 | + |
| YMR247W-A   | 2 | 0 | 0 | 0 | 13 | 769282 | 769425 | + |
| YMR251W-A   | 4 | 0 | 0 | 1 | 13 | 774751 | 774930 | + |
| smorf182536 | 0 | 0 | 0 | 1 | 13 | 784516 | 784554 | + |
| smorf182621 | 0 | 0 | 0 | 1 | 13 | 806725 | 806862 | + |
| YMR294W-A   | 1 | 0 | 1 | 0 | 13 | 858208 | 858567 | + |
| YMR315W-A   | 1 | 0 | 0 | 0 | 13 | 904285 | 904392 | + |
| YMR320W     | 2 | 0 | 1 | 0 | 13 | 916744 | 917049 | + |
| smorf183021 | 0 | 0 | 0 | 1 | 13 | 917518 | 917568 | + |
| smorf183098 | 0 | 0 | 0 | 1 | 13 | 15152  | 15196  | + |
| YML116W-A   | 1 | 0 | 1 | 1 | 13 | 37472  | 37774  | + |
| smorf183424 | 0 | 0 | 0 | 1 | 13 | 95702  | 95758  | + |
| smorf183502 | 0 | 0 | 0 | 1 | 13 | 121526 | 121702 | + |
| smorf183999 | 0 | 0 | 0 | 1 | 13 | 253238 | 253300 | + |
| YMR013W-A   | 4 | 0 | 0 | 1 | 13 | 298310 | 298390 | + |
| smorf184550 | 0 | 0 | 0 | 1 | 13 | 386285 | 386332 | + |
| smorf184687 | 0 | 0 | 0 | 1 | 13 | 429983 | 430039 | + |
| smorf184883 | 0 | 0 | 0 | 1 | 13 | 480923 | 481186 | + |
| smorf185026 | 0 | 0 | 0 | 1 | 13 | 512291 | 512341 | + |
| smorf185029 | 0 | 0 | 0 | 1 | 13 | 512981 | 513013 | + |
| smorf185153 | 0 | 0 | 0 | 1 | 13 | 549518 | 549553 | + |
| smorf185171 | 0 | 0 | 0 | 1 | 13 | 556880 | 556927 | + |
| YMR151W     | 2 | 0 | 1 | 0 | 13 | 562505 | 562942 | + |
| smorf185215 | 0 | 0 | 0 | 1 | 13 | 570578 | 570622 | + |
| smorf185309 | 0 | 0 | 0 | 1 | 13 | 592964 | 593008 | + |
| YMR175W     | 4 | 0 | 0 | 1 | 13 | 611015 | 611254 | + |
| smorf185708 | 0 | 0 | 0 | 1 | 13 | 720923 | 721024 | + |
| smorf185827 | 0 | 0 | 0 | 1 | 13 | 763361 | 763501 | + |
| YMR272W-B   | 2 | 0 | 0 | 0 | 13 | 811088 | 811195 | + |
| smorf186240 | 0 | 0 | 0 | 1 | 13 | 872978 | 873037 | + |
| smorf186241 | 0 | 0 | 0 | 1 | 13 | 873056 | 873103 | + |
| smorf186383 | 0 | 0 | 0 | 1 | 13 | 912635 | 912697 | + |
| smorf186489 | 0 | 0 | 0 | 1 | 13 | 13629  | 13661  | + |
| YML099W-A   | 1 | 0 | 1 | 0 | 13 | 74229  | 74558  | + |
| YML090W     | 4 | 0 | 1 | 0 | 13 | 90744  | 91130  | + |
| smorf186771 | 0 | 0 | 0 | 1 | 13 | 97734  | 97769  | + |
| YML084W     | 4 | 0 | 1 | 0 | 13 | 99489  | 99797  | + |
| smorf186872 | 0 | 0 | 0 | 1 | 13 | 121647 | 121694 | + |
| smorf186880 | 0 | 0 | 0 | 1 | 13 | 123057 | 123095 | + |
| YML058W-A   | 4 | 0 | 0 | 1 | 13 | 158760 | 158966 | + |
| smorf187191 | 0 | 0 | 0 | 1 | 13 | 202437 | 202481 | + |
| smorf187362 | 0 | 0 | 0 | 1 | 13 | 258444 | 258476 | + |
| YMR007W     | 4 | 0 | 1 | 0 | 13 | 279960 | 280340 | + |
| smorf187944 | 0 | 0 | 0 | 1 | 13 | 413250 | 413339 | + |
| smorf188038 | 0 | 0 | 0 | 1 | 13 | 434127 | 434159 | + |
| smorf188121 | 0 | 0 | 0 | 1 | 13 | 462891 | 462938 | + |
| smorf188253 | 0 | 0 | 0 | 1 | 13 | 501180 | 501236 | + |
| smorf188255 | 0 | 0 | 0 | 1 | 13 | 502251 | 502355 | + |
| YMR135W-A   | 3 | 0 | 1 | 0 | 13 | 539910 | 540443 | + |
| smorf188511 | 0 | 0 | 0 | 1 | 13 | 586902 | 586961 | + |
| smorf188561 | 0 | 0 | 0 | 1 | 13 | 601437 | 601517 | + |
| YMR175W-A   | 1 | 0 | 0 | 0 | 13 | 611313 | 611507 | + |
| YMR242W-A   | 4 | 0 | 0 | 0 | 13 | 754296 | 754385 | + |
| smorf189427 | 0 | 0 | 0 | 1 | 13 | 826374 | 826418 | + |
| YMR290W-A   | 3 | 0 | 1 | 0 | 13 | 851421 | 851768 | + |



|             |   |   |   |   |    |        |        |   |
|-------------|---|---|---|---|----|--------|--------|---|
| smorf189556 | 0 | 0 | 0 | 1 | 13 | 864696 | 864734 | + |
| smorf189571 | 0 | 0 | 0 | 1 | 13 | 867231 | 867269 | + |
| smorf189707 | 0 | 0 | 0 | 1 | 13 | 915063 | 915107 | + |
| YMR304C-A   | 4 | 0 | 1 | 0 | 13 | 878779 | 879129 | - |
| smorf190867 | 0 | 0 | 0 | 1 | 13 | 654682 | 654750 | - |
| YMR153C-A   | 1 | 0 | 1 | 0 | 13 | 565573 | 565908 | - |
| YMR122C     | 3 | 0 | 1 | 0 | 13 | 510700 | 511074 | - |
| smorf191843 | 0 | 0 | 0 | 1 | 13 | 390757 | 390804 | - |
| YMR052C-A   | 2 | 0 | 1 | 0 | 13 | 380068 | 380433 | - |
| smorf192210 | 0 | 0 | 0 | 1 | 13 | 276103 | 276141 | - |
| YML007C-A   | 4 | 0 | 0 | 1 | 13 | 253162 | 253272 | - |
| YML009C-A   | 3 | 0 | 1 | 0 | 13 | 250675 | 251001 | - |
| smorf192363 | 0 | 1 | 0 | 1 | 13 | 226813 | 226860 | - |
| YML034C-A   | 2 | 0 | 1 | 0 | 13 | 209428 | 209826 | - |
| YML054C-A   | 3 | 0 | 0 | 0 | 13 | 167623 | 167781 | - |
| YML094C-A   | 2 | 0 | 1 | 0 | 13 | 82219  | 82620  | - |
| smorf192909 | 0 | 0 | 0 | 1 | 13 | 74089  | 74130  | - |
| YMR324C     | 4 | 0 | 0 | 0 | 13 | 922200 | 922442 | - |
| smorf193309 | 0 | 0 | 0 | 1 | 13 | 904389 | 904505 | - |
| smorf193330 | 0 | 1 | 0 | 1 | 13 | 898449 | 898490 | - |
| YMR306C-A   | 1 | 0 | 1 | 0 | 13 | 886182 | 886571 | - |
| smorf193458 | 0 | 0 | 0 | 1 | 13 | 854472 | 854516 | - |
| smorf193639 | 0 | 0 | 0 | 1 | 13 | 800769 | 800816 | - |
| smorf193725 | 0 | 0 | 0 | 1 | 13 | 770331 | 770387 | - |
| smorf193975 | 0 | 0 | 0 | 1 | 13 | 698361 | 698399 | - |
| YMR194C-A   | 3 | 0 | 0 | 1 | 13 | 652911 | 653135 | - |
| smorf194227 | 0 | 0 | 0 | 1 | 13 | 619098 | 619370 | - |
| YMR172C-A   | 1 | 0 | 1 | 0 | 13 | 607827 | 608210 | - |
| smorf194281 | 0 | 0 | 0 | 1 | 13 | 600906 | 600980 | - |
| YMR141C     | 2 | 0 | 1 | 0 | 13 | 549735 | 550043 | - |
| smorf194601 | 0 | 0 | 0 | 1 | 13 | 513153 | 513221 | - |
| smorf194782 | 0 | 0 | 0 | 1 | 13 | 466275 | 466316 | - |
| smorf194872 | 0 | 0 | 0 | 1 | 13 | 436644 | 436685 | - |
| smorf194876 | 0 | 0 | 0 | 1 | 13 | 436032 | 436112 | - |
| smorf194995 | 0 | 0 | 0 | 1 | 13 | 401244 | 401279 | - |
| smorf195458 | 0 | 0 | 0 | 1 | 13 | 275688 | 275750 | - |
| smorf195465 | 0 | 0 | 0 | 1 | 13 | 273711 | 273761 | - |
| smorf195474 | 0 | 0 | 0 | 1 | 13 | 271857 | 271919 | - |
| YMR001C-A   | 4 | 0 | 0 | 1 | 13 | 271347 | 271577 | - |
| YML031C-A   | 3 | 0 | 1 | 0 | 13 | 214086 | 214421 | - |
| YML053C     | 4 | 0 | 1 | 1 | 13 | 169116 | 169754 | - |
| smorf195880 | 0 | 0 | 0 | 1 | 13 | 169035 | 169091 | - |
| YML057C-A   | 2 | 0 | 1 | 0 | 13 | 160023 | 160412 | - |
| smorf195909 | 0 | 0 | 0 | 1 | 13 | 159804 | 159854 | - |
| YML089C     | 4 | 1 | 1 | 0 | 13 | 91041  | 91409  | - |
| smorf196344 | 0 | 0 | 0 | 1 | 13 | 32562  | 32600  | - |
| YMR326C     | 4 | 0 | 1 | 0 | 13 | 923492 | 923800 | - |
| smorf196470 | 0 | 0 | 0 | 1 | 13 | 918107 | 918151 | - |
| smorf196495 | 0 | 0 | 0 | 1 | 13 | 910655 | 910744 | - |
| smorf196496 | 0 | 0 | 0 | 1 | 13 | 909962 | 910009 | - |
| YMR316C-B   | 1 | 0 | 1 | 0 | 13 | 907319 | 907627 | - |
| YMR316C-A   | 3 | 0 | 1 | 0 | 13 | 905660 | 905971 | - |
| smorf196517 | 0 | 0 | 0 | 1 | 13 | 903881 | 903925 | - |
| smorf196526 | 0 | 0 | 0 | 1 | 13 | 898709 | 898969 | - |
| smorf196865 | 0 | 0 | 0 | 1 | 13 | 795773 | 795805 | - |
| YMR254C     | 2 | 0 | 1 | 0 | 13 | 777614 | 777922 | - |
| YMR244C-A   | 1 | 0 | 1 | 1 | 13 | 758516 | 758830 | - |
| YMR193C-A   | 1 | 0 | 1 | 0 | 13 | 651071 | 651457 | - |
| smorf197720 | 0 | 0 | 0 | 1 | 13 | 560441 | 560494 | - |
| YMR103C     | 4 | 1 | 1 | 0 | 13 | 472901 | 473263 | - |
| YMR086C-A   | 3 | 1 | 1 | 0 | 13 | 442025 | 442363 | - |
| YMR082C     | 4 | 0 | 1 | 0 | 13 | 431768 | 432124 | - |
| YMR057C     | 4 | 0 | 1 | 0 | 13 | 388358 | 388729 | - |
| smorf198467 | 0 | 0 | 0 | 1 | 13 | 353648 | 353698 | - |
| YML122C     | 4 | 0 | 1 | 0 | 13 | 26039  | 26419  | - |
| smorf199706 | 0 | 0 | 0 | 1 | 13 | 9521   | 9553   | - |
| YNL337W     | 4 | 0 | 0 | 0 | 14 | 7165   | 7419   | + |
| YNL319W     | 1 | 0 | 1 | 0 | 14 | 38641  | 39081  | + |
| YNL303W     | 4 | 0 | 1 | 0 | 14 | 61510  | 61857  | + |
| smorf200685 | 0 | 0 | 0 | 1 | 14 | 263542 | 263577 | + |
| smorf200959 | 0 | 0 | 0 | 1 | 14 | 338008 | 338064 | + |
| smorf201010 | 0 | 0 | 0 | 1 | 14 | 356128 | 356235 | + |
| smorf201104 | 0 | 0 | 0 | 1 | 14 | 380881 | 381012 | + |

|             |   |   |   |   |    |        |        |   |
|-------------|---|---|---|---|----|--------|--------|---|
| smorf201180 | 0 | 0 | 0 | 1 | 14 | 418915 | 418953 | + |
| YNL109W     | 1 | 1 | 1 | 0 | 14 | 418966 | 419511 | + |
| YNL103W-A   | 2 | 0 | 0 | 0 | 14 | 426721 | 426810 | + |
| smorf201285 | 0 | 0 | 0 | 1 | 14 | 440821 | 440856 | + |
| smorf201511 | 0 | 0 | 0 | 1 | 14 | 515254 | 515286 | + |
| YNL046W     | 4 | 0 | 1 | 1 | 14 | 542305 | 542823 | + |
| smorf201631 | 0 | 0 | 0 | 1 | 14 | 561559 | 561624 | + |
| YNL034W     | 4 | 1 | 1 | 0 | 14 | 570478 | 572316 | + |
| YNL028W     | 3 | 0 | 1 | 0 | 14 | 578680 | 578997 | + |
| smorf201691 | 0 | 0 | 0 | 1 | 14 | 579028 | 579078 | + |
| smorf201873 | 0 | 1 | 0 | 1 | 14 | 626092 | 626133 | + |
| smorf201995 | 0 | 0 | 0 | 1 | 14 | 661552 | 661593 | + |
| smorf202200 | 0 | 0 | 0 | 1 | 14 | 727399 | 727440 | + |
| smorf202237 | 0 | 0 | 0 | 1 | 14 | 736726 | 736764 | + |
| smorf202335 | 0 | 0 | 0 | 1 | 14 | 759601 | 759696 | + |
| smorf202357 | 0 | 0 | 0 | 1 | 14 | 764521 | 764634 | + |
| YNL324W     | 2 | 0 | 1 | 0 | 14 | 31049  | 31444  | + |
| smorf202830 | 0 | 0 | 0 | 1 | 14 | 104672 | 104728 | + |
| smorf202891 | 0 | 0 | 0 | 1 | 14 | 118985 | 119047 | + |
| smorf203008 | 0 | 0 | 0 | 1 | 14 | 154922 | 154954 | + |
| YNL170W     | 2 | 1 | 1 | 0 | 14 | 315980 | 316375 | + |
| YNL150W     | 2 | 0 | 1 | 0 | 14 | 349253 | 349660 | + |
| YNL105W     | 1 | 1 | 1 | 0 | 14 | 424157 | 424585 | + |
| YNL067W-A   | 4 | 0 | 0 | 0 | 14 | 498539 | 498685 | + |
| YNL067W-B   | 3 | 0 | 0 | 0 | 14 | 499418 | 499558 | + |
| smorf204318 | 0 | 0 | 0 | 1 | 14 | 515873 | 515908 | + |
| smorf204471 | 0 | 0 | 0 | 1 | 14 | 552785 | 552817 | + |
| smorf204654 | 0 | 0 | 0 | 1 | 14 | 596780 | 596818 | + |
| smorf204704 | 0 | 0 | 0 | 1 | 14 | 611750 | 611797 | + |
| YNR001W-A   | 4 | 0 | 0 | 0 | 14 | 631265 | 631483 | + |
| smorf204777 | 0 | 0 | 0 | 1 | 14 | 632864 | 632905 | + |
| smorf204784 | 0 | 0 | 0 | 1 | 14 | 633779 | 633883 | + |
| smorf205082 | 0 | 0 | 0 | 1 | 14 | 720995 | 721081 | + |
| smorf205120 | 0 | 0 | 0 | 1 | 14 | 730832 | 730870 | + |
| smorf205177 | 0 | 0 | 0 | 1 | 14 | 743846 | 743938 | + |
| smorf205222 | 0 | 1 | 0 | 1 | 14 | 755267 | 755332 | + |
| smorf205454 | 0 | 0 | 0 | 1 | 14 | 28542  | 28613  | + |
| smorf205494 | 0 | 0 | 0 | 1 | 14 | 42702  | 42734  | + |
| YNL277W-A   | 2 | 0 | 0 | 1 | 14 | 116679 | 116867 | + |
| YNL269W     | 2 | 1 | 1 | 0 | 14 | 137700 | 138095 | + |
| smorf205959 | 0 | 0 | 0 | 1 | 14 | 169584 | 169625 | + |
| YNL226W     | 2 | 0 | 1 | 0 | 14 | 222240 | 222650 | + |
| smorf206267 | 0 | 0 | 0 | 1 | 14 | 273783 | 273836 | + |
| smorf206414 | 0 | 0 | 0 | 1 | 14 | 318768 | 318800 | + |
| YNL146W     | 4 | 0 | 1 | 0 | 14 | 351717 | 352019 | + |
| smorf206545 | 0 | 0 | 0 | 1 | 14 | 355767 | 355841 | + |
| smorf207017 | 0 | 0 | 0 | 1 | 14 | 486543 | 486611 | + |
| smorf207274 | 0 | 0 | 0 | 1 | 14 | 559146 | 559193 | + |
| YNL033W     | 4 | 0 | 1 | 0 | 14 | 573000 | 573854 | + |
| smorf207347 | 0 | 0 | 0 | 1 | 14 | 575754 | 575786 | + |
| smorf207583 | 0 | 0 | 0 | 1 | 14 | 625917 | 625985 | + |
| smorf207977 | 0 | 0 | 0 | 1 | 14 | 742365 | 742424 | + |
| smorf208059 | 0 | 0 | 0 | 1 | 14 | 769716 | 769880 | + |
| YNR077C     | 4 | 0 | 0 | 0 | 14 | 783287 | 783541 | - |
| YNR075C-A   | 3 | 0 | 0 | 0 | 14 | 781511 | 781603 | - |
| smorf208363 | 0 | 0 | 0 | 1 | 14 | 711182 | 711283 | - |
| smorf208382 | 0 | 0 | 0 | 1 | 14 | 706268 | 706318 | - |
| YNR025C     | 2 | 0 | 1 | 0 | 14 | 672704 | 673063 | - |
| YNL013C     | 1 | 0 | 1 | 0 | 14 | 609134 | 609511 | - |
| smorf208825 | 0 | 0 | 0 | 1 | 14 | 579278 | 579316 | - |
| smorf208994 | 0 | 0 | 0 | 1 | 14 | 529838 | 529879 | - |
| smorf209360 | 0 | 0 | 0 | 1 | 14 | 429743 | 429805 | - |
| smorf209499 | 0 | 0 | 0 | 1 | 14 | 394295 | 394351 | - |
| smorf209635 | 0 | 0 | 0 | 1 | 14 | 351746 | 351796 | - |
| YNL179C     | 4 | 0 | 1 | 1 | 14 | 300668 | 301105 | - |
| YNL184C     | 3 | 0 | 1 | 1 | 14 | 292559 | 292885 | - |
| smorf209878 | 0 | 0 | 0 | 1 | 14 | 275600 | 275656 | - |
| YNL235C     | 2 | 0 | 1 | 0 | 14 | 209549 | 209980 | - |
| smorf210154 | 0 | 0 | 0 | 1 | 14 | 201941 | 201976 | - |
| smorf210247 | 0 | 0 | 0 | 1 | 14 | 175202 | 175267 | - |
| smorf210540 | 0 | 0 | 0 | 1 | 14 | 82538  | 82612  | - |
| smorf211072 | 0 | 0 | 0 | 1 | 14 | 727153 | 727206 | - |
| smorf211767 | 0 | 0 | 0 | 1 | 14 | 553066 | 553119 | - |

|             |   |   |   |   |    |         |         |   |
|-------------|---|---|---|---|----|---------|---------|---|
| smorf211865 | 0 | 0 | 0 | 1 | 14 | 525109  | 525219  | - |
| smorf212302 | 0 | 0 | 0 | 1 | 14 | 393352  | 393399  | - |
| YNL130C-A   | 2 | 0 | 0 | 0 | 14 | 381247  | 381393  | - |
| YNL146C-A   | 2 | 1 | 0 | 0 | 14 | 351388  | 351582  | - |
| smorf212521 | 0 | 0 | 0 | 1 | 14 | 337678  | 337737  | - |
| smorf212537 | 0 | 0 | 0 | 1 | 14 | 332905  | 332958  | - |
| smorf212548 | 0 | 0 | 0 | 1 | 14 | 330772  | 330807  | - |
| YNL171C     | 2 | 0 | 1 | 0 | 14 | 315631  | 315999  | - |
| smorf212745 | 0 | 0 | 0 | 1 | 14 | 267121  | 267237  | - |
| smorf213405 | 0 | 0 | 0 | 1 | 14 | 68839   | 68895   | - |
| smorf213553 | 0 | 0 | 0 | 1 | 14 | 17317   | 17373   | - |
| smorf213831 | 0 | 0 | 0 | 1 | 14 | 727605  | 727685  | - |
| smorf213874 | 0 | 0 | 0 | 1 | 14 | 715848  | 715886  | - |
| smorf214123 | 0 | 0 | 0 | 1 | 14 | 643197  | 643235  | - |
| YNR005C     | 1 | 0 | 1 | 0 | 14 | 636933  | 637337  | - |
| smorf214239 | 0 | 0 | 0 | 1 | 14 | 610620  | 610652  | - |
| YNL018C     | 4 | 1 | 1 | 0 | 14 | 599937  | 601775  | - |
| YNL019C     | 4 | 1 | 1 | 0 | 14 | 598377  | 599231  | - |
| smorf214478 | 0 | 0 | 0 | 1 | 14 | 545964  | 546017  | - |
| smorf214540 | 0 | 0 | 0 | 1 | 14 | 531378  | 531422  | - |
| smorf214718 | 0 | 0 | 0 | 1 | 14 | 480177  | 480236  | - |
| smorf214739 | 0 | 0 | 0 | 1 | 14 | 473058  | 473141  | - |
| smorf214763 | 0 | 0 | 0 | 1 | 14 | 466524  | 466589  | - |
| YNL097C-B   | 2 | 0 | 0 | 0 | 14 | 440799  | 440921  | - |
| YNL114C     | 1 | 0 | 1 | 0 | 14 | 412686  | 413057  | - |
| YNL143C     | 3 | 0 | 1 | 0 | 14 | 356796  | 357188  | - |
| smorf215456 | 0 | 0 | 0 | 1 | 14 | 278514  | 278573  | - |
| YNL203C     | 2 | 0 | 1 | 0 | 14 | 259440  | 260051  | - |
| YNL205C     | 2 | 0 | 1 | 0 | 14 | 258156  | 258578  | - |
| smorf215679 | 0 | 1 | 0 | 1 | 14 | 205794  | 205835  | - |
| smorf215938 | 0 | 0 | 0 | 1 | 14 | 140409  | 140444  | - |
| smorf216029 | 0 | 0 | 0 | 1 | 14 | 122574  | 122621  | - |
| YOL164W     | 4 | 0 | 1 | 0 | 15 | 6175    | 8115    | + |
| smorf216633 | 0 | 0 | 0 | 1 | 15 | 15124   | 15219   | + |
| smorf216700 | 0 | 0 | 0 | 1 | 15 | 34225   | 34260   | + |
| smorf216732 | 0 | 0 | 0 | 1 | 15 | 39856   | 39948   | + |
| smorf216736 | 0 | 0 | 0 | 1 | 15 | 40510   | 40548   | + |
| smorf216934 | 0 | 0 | 0 | 1 | 15 | 83482   | 83529   | + |
| smorf217281 | 0 | 0 | 0 | 1 | 15 | 193795  | 193830  | + |
| YOL024W     | 4 | 0 | 1 | 0 | 15 | 277087  | 277605  | + |
| YOL019W-A   | 4 | 0 | 0 | 0 | 15 | 288421  | 288573  | + |
| YOL015W     | 4 | 1 | 1 | 0 | 15 | 297079  | 298839  | + |
| smorf217642 | 0 | 0 | 0 | 1 | 15 | 300181  | 300225  | + |
| smorf217734 | 0 | 0 | 0 | 1 | 15 | 338908  | 338976  | + |
| smorf217837 | 0 | 0 | 0 | 1 | 15 | 371269  | 371337  | + |
| smorf217898 | 0 | 0 | 0 | 1 | 15 | 385456  | 385488  | + |
| YOR032W-A   | 4 | 0 | 0 | 0 | 15 | 392176  | 392376  | + |
| smorf218000 | 0 | 0 | 0 | 1 | 15 | 418330  | 418386  | + |
| smorf218022 | 0 | 0 | 0 | 1 | 15 | 422626  | 422679  | + |
| smorf218549 | 0 | 0 | 0 | 1 | 15 | 571042  | 571227  | + |
| YOR170W     | 3 | 0 | 1 | 0 | 15 | 651859  | 652164  | + |
| smorf218982 | 0 | 1 | 0 | 1 | 15 | 701845  | 701979  | + |
| smorf218986 | 0 | 0 | 0 | 1 | 15 | 702733  | 702768  | + |
| YOR203W     | 4 | 0 | 1 | 0 | 15 | 722566  | 722919  | + |
| smorf219153 | 0 | 0 | 0 | 1 | 15 | 745300  | 745371  | + |
| smorf219332 | 0 | 0 | 0 | 1 | 15 | 802441  | 802488  | + |
| YOR300W     | 3 | 0 | 1 | 0 | 15 | 880573  | 880881  | + |
| smorf219668 | 0 | 1 | 0 | 1 | 15 | 890947  | 890997  | + |
| YOR314W     | 2 | 0 | 1 | 0 | 15 | 903040  | 903369  | + |
| smorf220171 | 0 | 0 | 0 | 1 | 15 | 1019176 | 1019259 | + |
| smorf220257 | 0 | 0 | 0 | 1 | 15 | 1051171 | 1051248 | + |
| smorf220296 | 0 | 0 | 0 | 1 | 15 | 1064626 | 1064727 | + |
| YOL164W-A   | 1 | 0 | 0 | 0 | 15 | 4130    | 4312    | + |
| YOL160W     | 2 | 0 | 1 | 0 | 15 | 14312   | 14653   | + |
| smorf220426 | 0 | 0 | 0 | 1 | 15 | 15824   | 15928   | + |
| YOL155W-A   | 1 | 0 | 0 | 0 | 15 | 27083   | 27217   | + |
| YOL131W     | 4 | 0 | 1 | 0 | 15 | 73031   | 73357   | + |
| smorf220732 | 0 | 0 | 0 | 1 | 15 | 96656   | 96823   | + |
| YOL097W-A   | 4 | 1 | 0 | 0 | 15 | 136220  | 136405  | + |
| YOL085W-A   | 2 | 0 | 0 | 0 | 15 | 161579  | 161791  | + |
| smorf221195 | 0 | 0 | 0 | 1 | 15 | 225593  | 225868  | + |
| smorf221545 | 0 | 0 | 0 | 1 | 15 | 315893  | 315937  | + |
| smorf221651 | 0 | 0 | 0 | 1 | 15 | 337571  | 337654  | + |

|             |   |   |   |   |    |         |         |   |
|-------------|---|---|---|---|----|---------|---------|---|
| smorf221684 | 0 | 0 | 0 | 1 | 15 | 348377  | 348418  | + |
| YOR011W-A   | 1 | 0 | 0 | 0 | 15 | 355652  | 355858  | + |
| YOR015W     | 3 | 0 | 1 | 0 | 15 | 359993  | 360352  | + |
| smorf221926 | 0 | 0 | 0 | 1 | 15 | 436763  | 436816  | + |
| smorf221991 | 0 | 0 | 0 | 1 | 15 | 458192  | 458230  | + |
| YOR072W     | 3 | 0 | 1 | 0 | 15 | 461504  | 461818  | + |
| smorf222071 | 0 | 0 | 0 | 1 | 15 | 474125  | 474172  | + |
| smorf222173 | 0 | 0 | 0 | 1 | 15 | 507425  | 507472  | + |
| smorf222289 | 0 | 0 | 0 | 1 | 15 | 550508  | 550579  | + |
| smorf222364 | 0 | 0 | 0 | 1 | 15 | 571079  | 571132  | + |
| smorf222599 | 0 | 1 | 0 | 1 | 15 | 639941  | 639985  | + |
| smorf222696 | 0 | 0 | 0 | 1 | 15 | 670697  | 670834  | + |
| YOR199W     | 4 | 0 | 1 | 0 | 15 | 720182  | 720511  | + |
| YOR225W     | 3 | 0 | 1 | 0 | 15 | 761393  | 761722  | + |
| smorf223233 | 0 | 0 | 0 | 1 | 15 | 801791  | 801823  | + |
| YOR284W     | 4 | 0 | 1 | 1 | 15 | 848477  | 849208  | + |
| smorf223863 | 0 | 0 | 0 | 1 | 15 | 969389  | 969508  | + |
| smorf223977 | 0 | 0 | 0 | 1 | 15 | 996692  | 996724  | + |
| smorf224130 | 0 | 0 | 0 | 1 | 15 | 1034753 | 1034785 | + |
| YOR376W     | 4 | 0 | 1 | 0 | 15 | 1043189 | 1043557 | + |
| smorf224210 | 0 | 0 | 0 | 1 | 15 | 1055285 | 1055353 | + |
| YOL166W-A   | 4 | 0 | 0 | 0 | 15 | 585     | 740     | + |
| smorf224394 | 0 | 0 | 0 | 1 | 15 | 9297    | 9359    | + |
| smorf224467 | 0 | 0 | 0 | 1 | 15 | 28494   | 28571   | + |
| smorf224866 | 0 | 0 | 0 | 1 | 15 | 138006  | 138104  | + |
| smorf225242 | 0 | 0 | 0 | 1 | 15 | 242013  | 242066  | + |
| smorf225378 | 0 | 0 | 0 | 1 | 15 | 281841  | 281966  | + |
| YOL014W     | 4 | 0 | 1 | 0 | 15 | 299694  | 300068  | + |
| smorf225454 | 0 | 0 | 0 | 1 | 15 | 304647  | 304718  | + |
| YOR008W-B   | 4 | 0 | 0 | 0 | 15 | 343929  | 344030  | + |
| YOR024W     | 4 | 0 | 1 | 0 | 15 | 377847  | 378170  | + |
| YOR029W     | 4 | 0 | 1 | 0 | 15 | 384600  | 384935  | + |
| smorf225767 | 0 | 0 | 0 | 1 | 15 | 389643  | 389675  | + |
| smorf225907 | 0 | 1 | 0 | 1 | 15 | 426600  | 426641  | + |
| YOR055W     | 1 | 1 | 1 | 0 | 15 | 429480  | 429914  | + |
| smorf226048 | 0 | 0 | 0 | 1 | 15 | 460650  | 460691  | + |
| YOR072W-A   | 2 | 0 | 0 | 0 | 15 | 461793  | 462041  | + |
| smorf226155 | 0 | 0 | 0 | 1 | 15 | 487224  | 487256  | + |
| smorf226179 | 0 | 0 | 0 | 1 | 15 | 490998  | 491054  | + |
| smorf226854 | 0 | 0 | 0 | 1 | 15 | 664728  | 664784  | + |
| smorf226870 | 0 | 1 | 0 | 1 | 15 | 667707  | 667787  | + |
| YOR183W     | 4 | 0 | 1 | 0 | 15 | 678873  | 679262  | + |
| YOR186W     | 4 | 0 | 1 | 0 | 15 | 683112  | 683546  | + |
| smorf227106 | 0 | 0 | 0 | 1 | 15 | 746529  | 746597  | + |
| YOR235W     | 4 | 0 | 1 | 0 | 15 | 779871  | 780185  | + |
| YOR282W     | 3 | 0 | 1 | 0 | 15 | 846999  | 847319  | + |
| smorf227497 | 0 | 0 | 0 | 1 | 15 | 874488  | 874538  | + |
| YOR314W-A   | 4 | 0 | 0 | 0 | 15 | 904455  | 904565  | + |
| smorf227622 | 0 | 0 | 0 | 1 | 15 | 912408  | 912446  | + |
| smorf227665 | 0 | 0 | 0 | 1 | 15 | 923142  | 923177  | + |
| YOR329W-A   | 3 | 0 | 0 | 0 | 15 | 939345  | 939554  | + |
| smorf227828 | 0 | 0 | 0 | 1 | 15 | 978477  | 978605  | + |
| smorf227923 | 0 | 0 | 0 | 1 | 15 | 1003944 | 1004036 | + |
| YOR364W     | 2 | 0 | 1 | 0 | 15 | 1023369 | 1023737 | + |
| smorf228080 | 0 | 0 | 0 | 1 | 15 | 1044702 | 1044764 | + |
| YOR376W-A   | 2 | 0 | 0 | 0 | 15 | 1045194 | 1045349 | + |
| YOR381W-A   | 2 | 0 | 0 | 0 | 15 | 1058421 | 1058588 | + |
| smorf228164 | 0 | 0 | 0 | 1 | 15 | 1069140 | 1069190 | + |
| YOR392W     | 1 | 0 | 1 | 0 | 15 | 1079280 | 1079723 | + |
| smorf228466 | 0 | 0 | 0 | 1 | 15 | 1026604 | 1026654 | - |
| YOR316C-A   | 3 | 0 | 0 | 0 | 15 | 907723  | 907932  | - |
| smorf228932 | 0 | 0 | 0 | 1 | 15 | 903358  | 903408  | - |
| YOR309C     | 4 | 0 | 1 | 1 | 15 | 896695  | 897075  | - |
| smorf229000 | 0 | 0 | 0 | 1 | 15 | 882547  | 882660  | - |
| smorf229140 | 0 | 0 | 0 | 1 | 15 | 849994  | 850029  | - |
| smorf229162 | 0 | 0 | 0 | 1 | 15 | 843022  | 843057  | - |
| smorf229340 | 0 | 0 | 0 | 1 | 15 | 784552  | 784614  | - |
| smorf229392 | 0 | 0 | 0 | 1 | 15 | 774172  | 774207  | - |
| smorf230529 | 0 | 0 | 0 | 1 | 15 | 464020  | 464052  | - |
| smorf230596 | 0 | 0 | 0 | 1 | 15 | 448192  | 448275  | - |
| smorf230732 | 0 | 0 | 0 | 1 | 15 | 409942  | 409989  | - |
| YOR041C     | 1 | 0 | 1 | 0 | 15 | 408358  | 408789  | - |
| YOR034C-A   | 2 | 0 | 0 | 0 | 15 | 397426  | 397668  | - |

|             |   |   |   |   |    |         |         |   |
|-------------|---|---|---|---|----|---------|---------|---|
| smorf230970 | 0 | 0 | 0 | 1 | 15 | 333421  | 333453  | - |
| smorf230999 | 0 | 0 | 0 | 1 | 15 | 326329  | 326433  | - |
| smorf231228 | 0 | 0 | 0 | 1 | 15 | 265057  | 265125  | - |
| YOL035C     | 2 | 0 | 1 | 0 | 15 | 258802  | 259104  | - |
| smorf231564 | 0 | 0 | 0 | 1 | 15 | 167752  | 167823  | - |
| smorf231856 | 0 | 0 | 0 | 1 | 15 | 97240   | 97332   | - |
| smorf231923 | 0 | 0 | 0 | 1 | 15 | 73831   | 73902   | - |
| YOL134C     | 2 | 0 | 1 | 0 | 15 | 70156   | 70545   | - |
| smorf232045 | 0 | 0 | 0 | 1 | 15 | 40093   | 40191   | - |
| YOL159C-A   | 4 | 0 | 0 | 1 | 15 | 15232   | 15504   | - |
| smorf232171 | 0 | 0 | 0 | 1 | 15 | 5560    | 5661    | - |
| YOL166C     | 1 | 1 | 1 | 0 | 15 | 1000    | 1338    | - |
| YOR394C-A   | 1 | 0 | 0 | 0 | 15 | 1084200 | 1084367 | - |
| smorf232324 | 0 | 0 | 0 | 1 | 15 | 1054914 | 1054961 | - |
| smorf232413 | 0 | 0 | 0 | 1 | 15 | 1027740 | 1027787 | - |
| smorf232504 | 0 | 0 | 0 | 1 | 15 | 1000944 | 1001027 | - |
| smorf232623 | 0 | 0 | 0 | 1 | 15 | 969765  | 969893  | - |
| YOR343C     | 4 | 0 | 1 | 0 | 15 | 968145  | 968471  | - |
| YOR333C     | 1 | 0 | 1 | 0 | 15 | 944538  | 944954  | - |
| smorf233368 | 0 | 0 | 0 | 1 | 15 | 741948  | 742100  | - |
| smorf233449 | 0 | 0 | 0 | 1 | 15 | 724917  | 724958  | - |
| smorf233524 | 0 | 0 | 0 | 1 | 15 | 701598  | 701690  | - |
| YOR121C     | 1 | 0 | 1 | 0 | 15 | 551799  | 552104  | - |
| smorf234039 | 0 | 0 | 0 | 1 | 15 | 550590  | 550652  | - |
| smorf234271 | 0 | 0 | 0 | 1 | 15 | 494790  | 494840  | - |
| YOR082C     | 3 | 0 | 1 | 0 | 15 | 479298  | 479639  | - |
| YOR050C     | 3 | 0 | 1 | 0 | 15 | 424272  | 424619  | - |
| YOR008C-A   | 1 | 0 | 0 | 0 | 15 | 342858  | 343082  | - |
| smorf234987 | 0 | 0 | 0 | 1 | 15 | 304932  | 304970  | - |
| smorf235012 | 0 | 1 | 0 | 1 | 15 | 298989  | 299063  | - |
| YOL037C     | 1 | 0 | 1 | 0 | 15 | 256665  | 257018  | - |
| YOL038C-A   | 1 | 0 | 0 | 1 | 15 | 254925  | 255020  | - |
| YOL085C     | 4 | 0 | 1 | 0 | 15 | 161673  | 162014  | - |
| smorf235531 | 0 | 0 | 0 | 1 | 15 | 160929  | 161006  | - |
| smorf235828 | 0 | 0 | 0 | 1 | 15 | 78216   | 78311   | - |
| YOL150C     | 1 | 1 | 1 | 0 | 15 | 44472   | 44783   | - |
| smorf235955 | 0 | 0 | 0 | 1 | 15 | 43344   | 43385   | - |
| smorf235979 | 0 | 0 | 0 | 1 | 15 | 39162   | 39242   | - |
| YOL159C     | 4 | 0 | 1 | 1 | 15 | 17280   | 17795   | - |
| smorf236095 | 0 | 0 | 0 | 1 | 15 | 8532    | 8612    | - |
| smorf236316 | 0 | 0 | 0 | 1 | 15 | 1045904 | 1045936 | - |
| smorf236554 | 0 | 0 | 0 | 1 | 15 | 981368  | 981424  | - |
| smorf236614 | 0 | 0 | 0 | 1 | 15 | 967928  | 967975  | - |
| YOR331C     | 4 | 0 | 1 | 0 | 15 | 943562  | 944119  | - |
| smorf237052 | 0 | 0 | 0 | 1 | 15 | 853622  | 853825  | - |
| YOR263C     | 2 | 0 | 1 | 0 | 15 | 818756  | 819163  | - |
| smorf237380 | 0 | 0 | 0 | 1 | 15 | 769847  | 769912  | - |
| smorf237666 | 0 | 0 | 0 | 1 | 15 | 689342  | 689395  | - |
| smorf237724 | 0 | 0 | 0 | 1 | 15 | 675311  | 675358  | - |
| smorf237749 | 0 | 0 | 0 | 1 | 15 | 665465  | 665506  | - |
| smorf237769 | 0 | 0 | 0 | 1 | 15 | 661994  | 662104  | - |
| YOR169C     | 2 | 0 | 1 | 0 | 15 | 651377  | 651841  | - |
| YOR161C-C   | 1 | 0 | 0 | 0 | 15 | 639122  | 639268  | - |
| YOR135C     | 1 | 1 | 1 | 0 | 15 | 580160  | 580501  | - |
| smorf238076 | 0 | 0 | 0 | 1 | 15 | 579539  | 579688  | - |
| smorf238083 | 0 | 0 | 0 | 1 | 15 | 577832  | 577933  | - |
| smorf238249 | 0 | 1 | 0 | 1 | 15 | 524996  | 525040  | - |
| smorf238258 | 0 | 0 | 0 | 1 | 15 | 522596  | 522640  | - |
| smorf238683 | 0 | 0 | 0 | 1 | 15 | 367085  | 367135  | - |
| smorf238732 | 0 | 0 | 0 | 1 | 15 | 355649  | 355681  | - |
| smorf238857 | 0 | 0 | 0 | 1 | 15 | 324881  | 325009  | - |
| YOL052C-A   | 4 | 1 | 0 | 1 | 15 | 231569  | 231754  | - |
| smorf239229 | 0 | 0 | 0 | 1 | 15 | 220523  | 220555  | - |
| smorf239636 | 0 | 0 | 0 | 1 | 15 | 106268  | 106360  | - |
| YOL118C     | 3 | 0 | 1 | 0 | 15 | 96608   | 96916   | - |
| smorf239753 | 0 | 0 | 0 | 1 | 15 | 72719   | 72754   | - |
| smorf239890 | 0 | 0 | 0 | 1 | 15 | 39662   | 39718   | - |
| smorf239906 | 0 | 0 | 0 | 1 | 15 | 35753   | 35848   | - |
| smorf239983 | 0 | 0 | 0 | 1 | 15 | 15989   | 16027   | - |
| smorf240109 | 0 | 0 | 0 | 1 | 16 | 20197   | 20271   | + |
| smorf240134 | 0 | 0 | 0 | 1 | 16 | 26107   | 26145   | + |
| smorf240184 | 0 | 0 | 0 | 1 | 16 | 44470   | 44526   | + |
| smorf240312 | 0 | 0 | 0 | 1 | 16 | 79636   | 79677   | + |

|             |   |   |   |   |    |        |        |   |
|-------------|---|---|---|---|----|--------|--------|---|
| smorf240700 | 0 | 0 | 0 | 1 | 16 | 192928 | 192990 | + |
| smorf240717 | 0 | 0 | 0 | 1 | 16 | 197815 | 197874 | + |
| YPL152W-A   | 1 | 0 | 0 | 1 | 16 | 264601 | 264699 | + |
| smorf241370 | 0 | 0 | 0 | 1 | 16 | 378973 | 379131 | + |
| smorf241479 | 0 | 0 | 0 | 1 | 16 | 418384 | 418446 | + |
| smorf241515 | 0 | 0 | 0 | 1 | 16 | 425221 | 425274 | + |
| smorf241754 | 0 | 0 | 0 | 1 | 16 | 486409 | 486471 | + |
| YPL027W     | 4 | 0 | 1 | 0 | 16 | 499663 | 500400 | + |
| YPR087W     | 1 | 0 | 1 | 0 | 16 | 711352 | 711672 | + |
| smorf242717 | 0 | 0 | 0 | 1 | 16 | 777577 | 777669 | + |
| YPR150W     | 1 | 0 | 1 | 0 | 16 | 830995 | 831516 | + |
| smorf243001 | 0 | 0 | 0 | 1 | 16 | 856555 | 856599 | + |
| smorf243045 | 0 | 0 | 0 | 1 | 16 | 870289 | 870333 | + |
| smorf243278 | 0 | 0 | 0 | 1 | 16 | 924220 | 924276 | + |
| smorf243306 | 0 | 0 | 0 | 1 | 16 | 929128 | 929220 | + |
| smorf243412 | 0 | 0 | 0 | 1 | 16 | 12791  | 12853  | + |
| smorf243573 | 0 | 0 | 0 | 1 | 16 | 53045  | 53098  | + |
| smorf243624 | 0 | 0 | 0 | 1 | 16 | 62711  | 62752  | + |
| YPL251W     | 1 | 0 | 1 | 0 | 16 | 73625  | 73927  | + |
| smorf243696 | 0 | 0 | 0 | 1 | 16 | 81491  | 81526  | + |
| smorf243709 | 0 | 0 | 0 | 1 | 16 | 85394  | 85429  | + |
| smorf243988 | 0 | 0 | 0 | 1 | 16 | 169730 | 169765 | + |
| smorf244305 | 0 | 0 | 0 | 1 | 16 | 261488 | 261541 | + |
| smorf244406 | 0 | 0 | 0 | 1 | 16 | 286583 | 286765 | + |
| YPL124W     | 4 | 0 | 1 | 1 | 16 | 316754 | 317515 | + |
| smorf244674 | 0 | 0 | 0 | 1 | 16 | 352655 | 352696 | + |
| smorf244856 | 0 | 0 | 0 | 1 | 16 | 398246 | 398284 | + |
| smorf245008 | 0 | 1 | 0 | 1 | 16 | 444017 | 444049 | + |
| smorf245086 | 0 | 0 | 0 | 1 | 16 | 462233 | 462313 | + |
| YPL038W-A   | 1 | 0 | 0 | 0 | 16 | 480179 | 480370 | + |
| smorf245430 | 0 | 0 | 0 | 1 | 16 | 544052 | 544102 | + |
| smorf245439 | 0 | 0 | 0 | 1 | 16 | 553472 | 553504 | + |
| smorf245509 | 0 | 0 | 0 | 1 | 16 | 566327 | 566377 | + |
| YPR012W     | 2 | 0 | 0 | 0 | 16 | 584306 | 584560 | + |
| YPR016W-A   | 4 | 0 | 0 | 0 | 16 | 593093 | 593353 | + |
| YPR039W     | 2 | 0 | 1 | 0 | 16 | 647009 | 647344 | + |
| smorf246058 | 0 | 0 | 0 | 1 | 16 | 729140 | 729175 | + |
| smorf246523 | 0 | 0 | 0 | 1 | 16 | 855764 | 855799 | + |
| YPL257W     | 4 | 0 | 1 | 1 | 16 | 63279  | 63860  | + |
| smorf247096 | 0 | 0 | 0 | 1 | 16 | 74160  | 74219  | + |
| smorf247301 | 0 | 0 | 0 | 1 | 16 | 128523 | 128555 | + |
| YPL200W     | 4 | 0 | 1 | 0 | 16 | 171483 | 171953 | + |
| smorf247515 | 0 | 0 | 0 | 1 | 16 | 183852 | 183974 | + |
| YPL185W     | 3 | 0 | 1 | 1 | 16 | 195252 | 195647 | + |
| smorf247562 | 0 | 0 | 0 | 1 | 16 | 197934 | 197978 | + |
| smorf247637 | 0 | 0 | 0 | 1 | 16 | 212886 | 212927 | + |
| smorf247944 | 0 | 0 | 0 | 1 | 16 | 286818 | 286874 | + |
| smorf248031 | 0 | 0 | 0 | 1 | 16 | 308655 | 308705 | + |
| YPL062W     | 4 | 0 | 1 | 0 | 16 | 431892 | 432296 | + |
| smorf248735 | 0 | 1 | 0 | 1 | 16 | 519324 | 519392 | + |
| YPR064W     | 4 | 0 | 1 | 0 | 16 | 678948 | 679367 | + |
| YPR092W     | 2 | 0 | 1 | 0 | 16 | 718377 | 718682 | + |
| smorf249651 | 0 | 0 | 0 | 1 | 16 | 770037 | 770132 | + |
| smorf249825 | 0 | 0 | 0 | 1 | 16 | 812850 | 812924 | + |
| smorf250197 | 0 | 0 | 0 | 1 | 16 | 917322 | 917360 | + |
| smorf250291 | 0 | 0 | 0 | 1 | 16 | 941553 | 941594 | + |
| smorf250357 | 0 | 0 | 0 | 1 | 16 | 936834 | 936875 | - |
| YPR197C     | 2 | 0 | 1 | 0 | 16 | 933894 | 934457 | - |
| smorf250518 | 0 | 0 | 0 | 1 | 16 | 886443 | 886481 | - |
| smorf250532 | 0 | 0 | 0 | 1 | 16 | 882663 | 882698 | - |
| YPR151C     | 4 | 1 | 1 | 0 | 16 | 831051 | 831671 | - |
| smorf250859 | 0 | 0 | 0 | 1 | 16 | 787503 | 787550 | - |
| smorf251333 | 0 | 0 | 0 | 1 | 16 | 658836 | 658889 | - |
| smorf251485 | 0 | 0 | 0 | 1 | 16 | 619887 | 619937 | - |
| smorf251598 | 0 | 0 | 0 | 1 | 16 | 589878 | 589922 | - |
| smorf251722 | 0 | 0 | 0 | 1 | 16 | 556722 | 556814 | - |
| smorf252105 | 0 | 0 | 0 | 1 | 16 | 444108 | 444245 | - |
| smorf252189 | 0 | 0 | 0 | 1 | 16 | 415392 | 415430 | - |
| smorf252373 | 0 | 0 | 0 | 1 | 16 | 367542 | 367577 | - |
| YPL102C     | 4 | 0 | 1 | 0 | 16 | 360000 | 360302 | - |
| smorf252640 | 0 | 0 | 0 | 1 | 16 | 297267 | 297338 | - |
| smorf252930 | 0 | 1 | 0 | 1 | 16 | 214641 | 214721 | - |
| smorf253025 | 0 | 0 | 0 | 1 | 16 | 188919 | 188960 | - |

|             |   |   |   |   |    |         |         |   |
|-------------|---|---|---|---|----|---------|---------|---|
| YPL197C     | 2 | 0 | 1 | 0 | 16 | 174342  | 174755  | - |
| smorf253145 | 0 | 0 | 0 | 1 | 16 | 146454  | 146504  | - |
| smorf253489 | 0 | 0 | 0 | 1 | 16 | 55893   | 55961   | - |
| YPL261C     | 3 | 0 | 1 | 0 | 16 | 48996   | 49304   | - |
| smorf253532 | 0 | 0 | 0 | 1 | 16 | 47091   | 47204   | - |
| smorf253760 | 0 | 0 | 0 | 1 | 16 | 937265  | 937297  | - |
| smorf253795 | 0 | 0 | 0 | 1 | 16 | 930413  | 930448  | - |
| smorf254143 | 0 | 0 | 0 | 1 | 16 | 844223  | 844354  | - |
| smorf254186 | 0 | 0 | 0 | 1 | 16 | 830294  | 830422  | - |
| smorf254193 | 0 | 0 | 0 | 1 | 16 | 828557  | 828595  | - |
| YPR142C     | 4 | 0 | 1 | 0 | 16 | 818126  | 818689  | - |
| YPR130C     | 2 | 0 | 1 | 0 | 16 | 793370  | 793777  | - |
| YPR123C     | 2 | 1 | 1 | 0 | 16 | 786137  | 786571  | - |
| smorf254341 | 0 | 0 | 0 | 1 | 16 | 781517  | 781588  | - |
| smorf254383 | 0 | 0 | 0 | 1 | 16 | 770441  | 770473  | - |
| smorf254393 | 0 | 0 | 0 | 1 | 16 | 769043  | 769078  | - |
| smorf254486 | 0 | 0 | 0 | 1 | 16 | 733247  | 733291  | - |
| smorf254705 | 0 | 0 | 0 | 1 | 16 | 679436  | 679468  | - |
| YPR014C     | 4 | 0 | 1 | 0 | 16 | 587186  | 587515  | - |
| smorf255122 | 0 | 0 | 0 | 1 | 16 | 557279  | 557380  | - |
| YPL080C     | 2 | 0 | 1 | 0 | 16 | 406169  | 406495  | - |
| YPL119C-A   | 2 | 0 | 0 | 0 | 16 | 324023  | 324286  | - |
| smorf256039 | 0 | 1 | 0 | 1 | 16 | 301286  | 301345  | - |
| smorf256321 | 0 | 0 | 0 | 1 | 16 | 209951  | 209983  | - |
| smorf256387 | 0 | 0 | 0 | 1 | 16 | 198770  | 198811  | - |
| smorf256577 | 0 | 0 | 0 | 1 | 16 | 146108  | 146143  | - |
| YPL250C     | 4 | 0 | 1 | 1 | 16 | 74309   | 74719   | - |
| smorf257007 | 0 | 0 | 0 | 1 | 16 | 21449   | 21544   | - |
| smorf257115 | 0 | 0 | 0 | 1 | 16 | 940993  | 941040  | - |
| YPR195C     | 2 | 1 | 1 | 0 | 16 | 927961  | 928290  | - |
| smorf257187 | 0 | 0 | 0 | 1 | 16 | 923872  | 923931  | - |
| YPR170C     | 4 | 0 | 1 | 0 | 16 | 882979  | 883314  | - |
| YPR146C     | 4 | 0 | 1 | 1 | 16 | 825343  | 825672  | - |
| YPR145C-A   | 4 | 0 | 0 | 1 | 16 | 824686  | 824922  | - |
| smorf257693 | 0 | 0 | 0 | 1 | 16 | 789484  | 789525  | - |
| YPR126C     | 1 | 0 | 1 | 0 | 16 | 789073  | 789381  | - |
| YPR096C     | 4 | 0 | 1 | 0 | 16 | 724840  | 725142  | - |
| YPR053C     | 4 | 0 | 1 | 1 | 16 | 665785  | 666240  | - |
| smorf258193 | 0 | 0 | 0 | 1 | 16 | 657043  | 657123  | - |
| smorf258247 | 0 | 0 | 0 | 1 | 16 | 646207  | 646254  | - |
| YPR027C     | 4 | 1 | 1 | 0 | 16 | 620422  | 621255  | - |
| YPL025C     | 4 | 0 | 1 | 0 | 16 | 502471  | 503028  | - |
| smorf258801 | 0 | 0 | 0 | 1 | 16 | 486076  | 486147  | - |
| YPL056C     | 4 | 0 | 1 | 0 | 16 | 453427  | 453732  | - |
| smorf258999 | 0 | 0 | 0 | 1 | 16 | 431485  | 431520  | - |
| YPL182C     | 3 | 1 | 1 | 0 | 16 | 203305  | 203688  | - |
| smorf259922 | 0 | 0 | 0 | 1 | 16 | 175945  | 175998  | - |
| YPL205C     | 4 | 0 | 1 | 0 | 16 | 163921  | 164265  | - |
| smorf260060 | 0 | 0 | 0 | 1 | 16 | 145570  | 145635  | - |
| smorf260100 | 0 | 0 | 0 | 1 | 16 | 138322  | 138363  | - |
| smorf260204 | 0 | 0 | 0 | 1 | 16 | 105847  | 105891  | - |
| YBR090C     | 4 | 0 | 0 | 1 | 2  | 426327  | 427052  | - |
| YBR109W-A   | 2 | 0 | 0 | 1 | 2  | 458602  | 458826  | + |
| YDL069C     | 4 | 0 | 0 | 1 | 4  | 333121  | 333810  | - |
| YDR535C     | 3 | 0 | 0 | 0 | 4  | 1506597 | 1507353 | - |
| YER014C-A   | 4 | 0 | 0 | 0 | 5  | 183730  | 184699  | - |
| YER044C-A   | 4 | 0 | 0 | 0 | 5  | 238459  | 239773  | - |
| YHR199C-A   | 4 | 0 | 0 | 1 | 8  | 498571  | 498859  | - |
| YJL189W     | 2 | 0 | 0 | 1 | 10 | 75932   | 76473   | + |
| YJL052C-A   | 4 | 0 | 0 | 0 | 10 | 337879  | 337998  | - |
| YJL047C-A   | 4 | 0 | 0 | 0 | 10 | 349039  | 349173  | - |
| YJR079W     | 3 | 0 | 0 | 0 | 10 | 580198  | 581232  | + |
| YKL065W-A   | 4 | 0 | 0 | 0 | 11 | 315598  | 315819  | + |
| YLR202C     | 4 | 0 | 0 | 0 | 12 | 550196  | 550638  | - |
| YOR031W     | 4 | 0 | 0 | 0 | 15 | 389213  | 389422  | + |
| YOR103C     | 3 | 0 | 0 | 1 | 15 | 516450  | 516842  | - |
| YOR293C-A   | 2 | 0 | 0 | 0 | 15 | 867997  | 868146  | - |
| YOR318C     | 3 | 0 | 0 | 0 | 15 | 911781  | 912433  | - |
| YPR074W-A   | 4 | 0 | 0 | 0 | 16 | 695015  | 695185  | + |

**Supplementary Table 3. ORFs meeting the proto-gene designation.** ORF name: systematic name from SGD for ORFs<sub>1-4</sub> and internally generated name for ORFs<sub>0</sub>; these internally generated names do not bear any specific meaning. Conservation level: estimation of the relative time elapsed since emergence of the ORF in a range between 0 (most recent) and 4 (most ancient here; the entire range goes to 10) (Supplementary Information). Retained by natural selection: indicates whether the ORF was under significant intra-species natural selection (1) or not (0) (Supplementary Information). Length greater or equal to 300 nucleotides: indicates whether the ORF is longer (1) or shorter (0) than the threshold of 300 nucleotides traditionally used for delineating genes from non-genic ORFs in *S. cerevisiae*. With translation signatures: indicates whether the ORF is translated according to our pipeline (Supplementary Information). Coor1, Coor2: inferior and superior coordinates of the ORF.



| Figure | Variable 1         | Variable 2                                                           | ORF group in figure                                     | Kendall's <i>tau</i> in figure | Kendall's <i>tau</i> in bootstraps | Kendall's <i>tau</i> for ORFs <sub>5-10</sub> |
|--------|--------------------|----------------------------------------------------------------------|---------------------------------------------------------|--------------------------------|------------------------------------|-----------------------------------------------|
| 2a     | conservation level | length                                                               | ORFs <sub>0-10</sub>                                    | 0.31                           | 0.55 ± 0.02                        | 0.2                                           |
| 2a     | conservation level | expression level (average number of RNAseq reads in rich conditions) | ORFs <sub>0-10</sub>                                    | 0.28                           | 0.41 ± 0.02                        | 0.1                                           |
| 2b     | conservation level | codon adaptation index                                               | ORFs <sub>0-10</sub>                                    | 0.12                           | 0.28 ± 0.02                        | 0.19                                          |
| 3e     | conservation level | significant intra-species purifying selection                        | ORFs <sub>0</sub> <sup>+</sup> and ORFs <sub>1-10</sub> | 0.45                           | 0.39 ± 0.03                        | 0.2                                           |

**Supplementary Table 4. Controls for correlation statistics.** For correlation statistics presented in Fig. 2 and Fig. 3, bootstrap simulations were performed whereby only 50 ORFs per conservation level were sampled 100 times in order to control for the large number of ORFs<sub>0</sub>. Correlation statistics were also calculated for the group ORFs<sub>5-10</sub> only. For all these correlations,  $P < 10^{-14}$ .

## Supplementary References

- 31 Kellis, M., Birren, B.W., & Lander, E.S., Proof and evolutionary analysis of ancient genome duplication in the yeast *Saccharomyces cerevisiae*. *Nature* **428**, 617-624 (2004).
- 32 Tats, A., Tenson, T., & Remm, M., Preferred and avoided codon pairs in three domains of life. *BMC Genomics* 10.1186/1471-2164-9-463 (2008).
- 33 Makalowska, I., Lin, C.F., & Hernandez, K., Birth and death of gene overlaps in vertebrates. *BMC Evol Biol* 10.1186/1471-2148-7-193 (2007).
- 34 Liti, G. *et al.*, Population genomics of domestic and wild yeasts. *Nature* **458**, 337-341 (2009).
- 35 Vilella, A.J. *et al.*, EnsemblCompara GeneTrees: complete, duplication-aware phylogenetic trees in vertebrates. *Genome Res* **19**, 327-335 (2009).
- 36 Wapinski, I., Pfeffer, A., Friedman, N., & Regev, A., Natural history and evolutionary principles of gene duplication in fungi. *Nature* **449**, 54-61 (2007).
- 37 Edgar, R.C., MUSCLE: multiple sequence alignment with high accuracy and high throughput. *Nucleic Acids Res* **32**, 1792-1797 (2004).
- 38 Felsenstein, J. PHYLIP (Phylogeny Inference Package) version 3.6 (Distributed by the author. Department of Genome Sciences, University of Washington, Seattle, 2005).
- 39 Scannell, D.R., Byrne, K.P., Gordon, J.L., Wong, S., & Wolfe, K.H., Multiple rounds of speciation associated with reciprocal gene loss in polyploid yeasts. *Nature* **440**, 341-345 (2006).
- 40 Altschul, S.F. *et al.*, Gapped BLAST and PSI-BLAST: a new generation of protein database search programs. *Nucleic Acids Res* **25**, 3389-3402 (1997).
- 41 Wang, W., Zhang, J., Alvarez, C., Llopart, A., & Long, M., The origin of the *Jingwei* gene and the complex modular structure of its parental gene, *Yellow Emperor*, in *Drosophila melanogaster*. *Mol Biol Evol* **17**, 1294-1301 (2000).
- 42 Yang, Z., Likelihood ratio tests for detecting positive selection and application to primate lysozyme evolution. *Mol Biol Evol* **15**, 568-573 (1998).
- 43 Hall, C., Brachat, S., & Dietrich, F.S., Contribution of horizontal gene transfer to the evolution of *Saccharomyces cerevisiae*. *Eukaryot Cell* **4**, 1102-1115 (2005).
- 44 Hall, C. & Dietrich, F.S., The reacquisition of biotin prototrophy in *Saccharomyces cerevisiae* involved horizontal gene transfer, gene duplication and gene clustering. *Genetics* **177**, 2293-2307 (2007).
- 45 Rolland, T., Neuveglise, C., Sacerdot, C., & Dujon, B., Insertion of horizontally transferred genes within conserved syntenic regions of yeast genomes. *PLoS ONE* **4**, e6515 (2009).
- 46 Sonnhammer, E.L., von Heijne, G., & Krogh, A., A hidden Markov model for predicting transmembrane helices in protein sequences. *Proc Int Conf Intell Syst Mol Biol* **6**, 175-182 (1998).

- 47 Ward, J.J., McGuffin, L.J., Bryson, K., Buxton, B.F., & Jones, D.T., The DISOPRED server for the prediction of protein disorder. *Bioinformatics* **20**, 2138-2139 (2004).
- 48 Lupas, A., Van Dyke, M., & Stock, J., Predicting coiled coils from protein sequences. *Science* **252**, 1162-1164 (1991).
- 49 Gsponer, J., Futschik, M.E., Teichmann, S.A., & Babu, M.M., Tight regulation of unstructured proteins: from transcript synthesis to protein degradation. *Science* **322**, 1365-1368 (2008).
- 50 Kyte, J. & Doolittle, R.F., A simple method for displaying the hydropathic character of a protein. *J Mol Biol* **157**, 105-132 (1982).
- 51 Sharp, P.M. & Li, W.H., The Codon Adaptation Index--a measure of directional synonymous codon usage bias, and its potential applications. *Nucleic Acids Res* **15**, 1281-1295 (1987).
- 52 Miyasaka, H., The positive relationship between codon usage bias and translation initiation AUG context in *Saccharomyces cerevisiae*. *Yeast* **15**, 633-637 (1999).
- 53 David, L. *et al.*, A high-resolution map of transcription in the yeast genome. *Proc Natl Acad Sci U S A* **103**, 5320-5325 (2006).
- 54 Shumway, M., Cochrane, G., & Sugawara, H., Archiving next generation sequencing data. *Nucleic Acids Res* **38**, D870-871 (2009).
- 55 Langmead, B., Trapnell, C., Pop, M., & Salzberg, S.L., Ultrafast and memory-efficient alignment of short DNA sequences to the human genome. *Genome Biol* 10.1186/gb-2009-10-3-r25 (2009).
- 56 Ashburner, M. *et al.*, Gene ontology: tool for the unification of biology. *Nat Genet* **25**, 25-29 (2000).
- 57 Harbison, C.T. *et al.*, Transcriptional regulatory code of a eukaryotic genome. *Nature* **431**, 99-104 (2004).
- 58 R Development Core Team, R: A language and environment for statistical computing (R Foundation for Statistical Computing, Vienna, Austria, 2011).
- 59 Kim, S.H. & Yi, S.V., Correlated asymmetry of sequence and functional divergence between duplicate proteins of *Saccharomyces cerevisiae*. *Mol Biol Evol* **23**, 1068-1075 (2006).
